# Supplementary material for: Diastereo- and enantioselective construction of spirooxindole scaffolds through a catalytic asymmetric [3 + 3] cycloaddition
Source: Royal Society of Chemistry journal article supplement (doi:10.1039/c7ob01059a), 2017-01-01
Supplement: c7ob01059a1.pdf [file c7ob01059a1.pdf]

## *Supporting Information for*

# **Diastereo- and Enantioselective Construction of Spirooxindole Scaffolds through a Catalytic Asymmetric [3+3] Cycloaddition**

Can Li,<sup>‡</sup> Han Lu,<sup>‡</sup> Xiao-Xue Sun, Guang-Jian Mei<sup>\*</sup> and Feng Shi<sup>\*</sup>

*School of Chemistry & Material Science, Jiangsu Normal University, Xuzhou, 221116, China*

*E-mail: [fshi@jsnu.edu.cn](mailto:fshi@jsnu.edu.cn); [guangjianM@jsnu.edu.cn](mailto:guangjianM@jsnu.edu.cn)*

### **Contents:**

- 1. General information (S2)**
- 2. General procedure for the catalytic asymmetric synthesis of products 6 (S2)**
- 3. Characterization data of products 6 (S3-S13)**
- 4. NMR spectra of products 6 (S14-S31)**
- 5. HPLC spectra of products 6 (S32-S49)**
- 6. X-ray single crystal data for product 6aa (S50-S51)**

**1. General information:**  $^1\text{H}$  and  $^{13}\text{C}$  NMR spectra were measured respectively at 400 and 100 MHz, respectively. The solvent used for NMR spectroscopy were  $\text{CDCl}_3$  and acetone- $d_6$ , using tetramethylsilane as the internal reference. HRMS spectra were recorded on a LTQ-Orbitrap mass spectrometer. Enantiomeric ratios (*er*) were determined by chiral high-performance liquid chromatography (chiral HPLC). The chiral column used for the determination of Enantiomeric ratios by chiral HPLC was Chiralpak IC, IA and AD-H columns. Optical rotation values were measured with instruments operating at  $\lambda = 589$  nm, corresponding to the sodium D line at the temperatures indicated. Analytical grade solvents for the column chromatography and commercially available reagents were used as received. All starting materials commercially available were used directly. Substrates **1** were synthesized according to the literature methods.<sup>1</sup>

## 2. General procedure for the catalytic asymmetric synthesis of products **6**

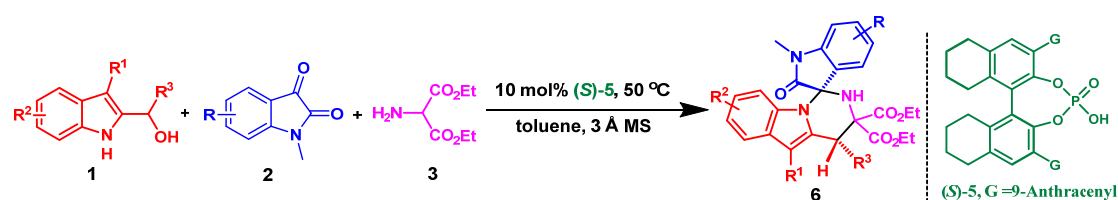

After a solution of *N*-methyl-isatins **2** (0.12 mmol), amino ester **3** (0.11 mmol), the catalyst **5** (0.01 mmol), and 3 Å molecular sieves (100 mg) in toluene (4 mL) was stirred at 25 °C for 30 minutes, the solution of 3-substituted-2-indolylmethanols **1** (0.1 mmol) in toluene (4 mL) was added. After being stirred at 50 °C for 12 h, the reaction mixture was filtered to remove molecular sieves and the solid powder was washed with ethyl acetate. The resultant solution was concentrated under the reduced pressure to give the residue, which was purified through flash column chromatography on silica gel to afford pure product **6**.

<sup>1</sup> K. Bera, C. Schneider, *Chem. Eur. J.* **2016**, *22*, 7074.

### 3. Characterization data of products 6

#### **(1'S,4'S)-diethyl-1,5'-dimethyl-2-oxo-4'-phenyl-2'H-spiro[indoline-3,1'-pyrimido[1,6-a]indole]-3',3'(4'H)-dicarboxylate (6aa):**

Flash column chromatography eluent, petroleum ether/ethyl acetate = 4/1; Reaction time = 12 h; yield: 74% (39.8 mg); yellowish solid, m.p. 118.8-119.5 °C;  $[\alpha]_D^{20} = +135.2$  (c = 0.59, CHCl<sub>3</sub>); <sup>1</sup>H NMR (400 MHz, CDCl<sub>3</sub>) δ 7.69 (d, *J* = 7.4 Hz, 1H), 7.54 (t, *J* = 7.8 Hz, 1H), 7.51 – 7.42 (m, 3H), 7.31 (t, *J* = 7.5 Hz, 2H), 7.26 – 7.19 (m, 2H), 7.04 – 6.98 (m, 2H), 6.83 (t, *J* = 7.7 Hz, 1H), 6.20 (d, *J* = 8.3 Hz, 1H), 5.56 (s, 1H), 4.37 – 4.29 (m, 1H), 4.23 – 4.13 (m, 1H), 4.12 – 4.01 (m, 1H), 3.94 – 3.85 (m, 1H), 3.66 (s, 1H), 3.17 (s, 3H), 2.20 (s, 3H), 1.26 (t, *J* = 7.1 Hz, 3H), 1.15 (t, *J* = 7.1 Hz, 3H); <sup>13</sup>C NMR (100 MHz, CDCl<sub>3</sub>) δ 172.5, 168.2, 167.7, 144.2, 139.1, 134.9, 132.5, 131.8, 130.7, 128.9, 128.4, 128.1, 127.5, 124.6, 123.8, 121.6, 120.3, 118.7, 110.2, 109.7, 109.2, 72.4, 67.1, 62.5, 62.2, 41.4, 26.1, 13.9, 13.8, 8.1; IR (KBr): 2981, 2935, 1613, 1471, 1493, 1456, 1336, 1367, 1299, 1257, 1242, 1210, 1180, 1095, 1077, 1019, 757 cm<sup>-1</sup>; ESI FTMS exact mass calcd for (C<sub>32</sub>H<sub>31</sub>N<sub>3</sub>O<sub>5</sub>+H)<sup>+</sup> requires *m/z* 538.2342, found *m/z* 538.2342; Enantiomeric ratio: 82:18, determined by HPLC (Daicel Chiralpak AD-H, hexane/ isopropanol = 70/30, flow rate 1.0 mL/min, T = 30 °C, 254 nm): *t<sub>R</sub>* = 4.10 min (minor), *t<sub>R</sub>* = 5.35 min (major).

#### **(1'R,4'R)-diethyl-1,5'-dimethyl-2-oxo-4'-(*o*-tolyl)-2'H-spiro[indoline-3,1'-pyrimid[1,6-a]indole]-3',3'(4'H)-dicarboxylate (*ent*-6ba):**

Flash column chromatography eluent, petroleum ether/ethyl acetate = 4/1; Reaction time = 12 h; yield: 56% (30.9 mg); yellowish solid, m.p. 143.7-144.9 °C;  $[\alpha]_D^{20} = -103.6$  (c = 0.15, CHCl<sub>3</sub>); <sup>1</sup>H NMR (400 MHz, CDCl<sub>3</sub>) δ 7.70 (d, *J* = 7.4 Hz, 1H), 7.61 – 7.54 (m, 2H), 7.31 – 7.25 (m, 2H), 7.17 – 7.09 (m, 3H), 7.05 (d, *J* = 7.8 Hz, 1H), 6.94 (d, *J* = 8.4 Hz, 1H), 6.06 (s, 1H), 5.96 (s, 1H), 4.33 – 4.25 (m, 1H), 4.21 – 4.13 (m, 1H), 3.99 – 3.91 (m, 1H), 3.81 (s, 1H), 3.72 – 3.65 (m, 1H), 3.19 (s, 3H), 2.68 (s, 3H), 2.09 (s, 3H), 1.24 (t, *J* = 7.0 Hz, 3H), 1.02 (t, *J* = 7.1 Hz, 3H); <sup>13</sup>C NMR (100 MHz, CDCl<sub>3</sub>) δ 172.2, 168.4, 167.5, 144.1, 137.3, 135.6, 135.1, 134.3, 132.1, 130.5, 129.1, 128.9, 127.4, 127.3, 127.1, 126.4, 124.6, 123.9, 120.9, 119.3, 110.5,

109.7, 109.4, 72.1, 66.7, 62.5, 62.3, 35.6, 26.2, 20.2, 13.9, 13.5, 8.2; IR (KBr): 2920, 1869, 1742, 1614, 1559, 1542, 1508, 1493, 1470, 1368, 1327, 1301, 1252, 1238, 1208, 1173, 1073  $\text{cm}^{-1}$ ; ESI FTMS exact mass calcd for  $(\text{C}_{33}\text{H}_{33}\text{N}_3\text{O}_5+\text{Na})^+$  requires  $m/z$  574.2318, found  $m/z$  574.2326; Enantiomeric ratio: 90:10, determined by HPLC (Daicel Chiralpak AD-H, hexane/ isopropanol = 70/30, flow rate 1.0 mL/min, T = 30 °C, 254 nm):  $t_R$  = 3.94 min (major),  $t_R$  = 9.71 min (minor).

**(1'S,4'S)-diethyl-4'-(2-methoxyphenyl)-1,5'-dimethyl-2-oxo-2'H-spiro[indoline-3,1'-pyrimido[1,6-a]indole]-3',3'(4'H)-dicarboxylate (6ca):**

Flash column chromatography eluent, petroleum ether/ethyl acetate = 4/1; Reaction time = 12 h; yield: 83% (47.1 mg); yellowish solid, m.p. 118.9-119.6 °C;  $[\alpha]_D^{20} = +132.6$  (c = 0.91,  $\text{CHCl}_3$ );  $^1\text{H}$  NMR (400 MHz,  $\text{CDCl}_3$ )  $\delta$  7.72 – 7.66 (m, 2H), 7.54 (t,  $J = 7.8$  Hz, 1H), 7.40 (d,  $J = 7.8$  Hz, 1H), 7.24 – 7.17 (m, 2H), 7.02 – 6.95 (m, 2H), 6.92 – 6.86 (m, 2H), 6.77 (t,  $J = 7.7$  Hz, 1H), 6.27 (s, 1H), 6.14 (d,  $J = 8.3$  Hz, 1H), 4.33 – 4.25 (m, 1H), 4.19 – 4.10 (m, 1H), 4.02 – 3.94 (m, 1H), 3.93 (s, 3H), 3.78 – 3.69 (m, 2H), 3.17 (s, 3H), 2.17 (s, 3H), 1.24 (t,  $J = 7.1$  Hz, 3H), 1.02 (t,  $J = 7.1$  Hz, 3H);  $^{13}\text{C}$  NMR (100 MHz,  $\text{CDCl}_3$ )  $\delta$  172.6, 168.3, 168.0, 156.2, 144.2, 135.0, 133.5, 131.6, 130.7, 130.1, 128.3, 128.2, 127.6, 124.7, 123.6, 121.2, 120.6, 120.1, 118.5, 110.4, 110.1, 109.5, 109.1, 72.4, 66.6, 62.1, 62.0, 55.6, 26.0, 13.9, 13.5, 7.9; IR (KBr): 3565, 3445, 1742, 1614, 1491, 1471, 1456, 1368, 1336, 1301, 1243, 1208, 1094, 1052, 1020, 751, 650  $\text{cm}^{-1}$ ; ESI FTMS exact mass calcd for  $(\text{C}_{33}\text{H}_{33}\text{N}_3\text{O}_6+\text{Na})^+$  requires  $m/z$  590.2267, found  $m/z$  590.2277; Enantiomeric ratio: 81:19, determined by HPLC (Daicel Chiralpak AD-H, hexane/ isopropanol = 70/30, flow rate 1.0 mL/min, T = 30 °C, 254 nm):  $t_R$  = 4.16 min (minor),  $t_R$  = 5.58 min (major).

**(1'R,4'R)-diethyl-4'-(2-chlorophenyl)-1,5'-dimethyl-2-oxo-2'H-spiro[indoline-3,1'-pyrimido[1,6-a]indole]-3',3'(4'H)-dicarboxylate (ent-4da):**

Flash column chromatography eluent, petroleum ether/ethyl acetate = 4/1; Reaction time = 12 h; yield: 67% (38.3 mg); yellowish oil;  $[\alpha]_D^{20} = -180.3$  (c = 0.24,  $\text{CHCl}_3$ );  $^1\text{H}$  NMR (400 MHz,  $\text{CDCl}_3$ )  $\delta$  7.86 (d,  $J = 7.6$  Hz, 1H), 7.70 (d,  $J = 7.4$  Hz, 1H), 7.57

(t,  $J = 7.8$  Hz, 1H), 7.41 (dd,  $J = 11.3, 7.9$  Hz, 2H), 7.26 – 7.10 (m, 3H), 7.04 – 6.97 (m, 2H), 6.80 (t,  $J = 7.7$  Hz, 1H), 6.39 (s, 1H), 6.14 (d,  $J = 8.3$  Hz, 1H), 4.33 – 4.26 (m, 1H), 4.24 – 4.16 (m, 1H), 4.07 – 3.99 (m, 1H), 3.85 – 3.78 (m, 1H), 3.76 (s, 1H), 3.16 (s, 3H), 2.23 (s, 3H), 1.26 (t,  $J = 7.2$  Hz, 3H), 1.11 (t,  $J = 7.1$  Hz, 3H);  $^{13}\text{C}$  NMR (100 MHz,  $\text{CDCl}_3$ )  $\delta$  172.4, 168.0, 167.7, 144.2, 136.9, 135.1, 133.4, 132.5, 131.8, 130.6, 129.5, 128.4, 127.9, 127.1, 124.8, 123.7, 121.6, 120.3, 118.7, 110.6, 110.3, 109.2, 72.3, 66.3, 62.6, 62.2, 36.0, 26.0, 13.9, 13.6, 8.2; IR (KBr): 2979, 2934, 2360, 2340, 1743, 1614, 1494, 1471, 1456, 1368, 1336, 1300, 1259, 1240, 1209, 1182, 1095, 1076, 1038, 1019  $\text{cm}^{-1}$ ; ESI FTMS exact mass calcd for  $(\text{C}_{32}\text{H}_{30}\text{ClN}_3\text{O}_5+\text{Na})^+$  requires  $m/z$  594.1772, found  $m/z$  594.1766; Enantiomeric ratio: 92:8, determined by HPLC (Daicel Chiralpak AD-H, hexane/ isopropanol = 70/30, flow rate 1.0 mL/min,  $T = 30$  °C, 254 nm):  $t_{\text{R}} = 4.45$  min (major),  $t_{\text{R}} = 5.32$  min (minor).

**(1'R,4'R)-diethyl-4'-(3-fluorophenyl)-1,5'-dimethyl-2-oxo-2'H-spiro[indoline-3,1'-pyrimido[1,6-a]indole]-3',3'(4'H)-dicarboxylate (ent-6ea):**

Flash column chromatography eluent, petroleum ether/ethyl acetate = 4/1; Reaction time = 12 h; yield: 53% (29.4 mg); yellowish oil;  $[\alpha]_{\text{D}}^{20} = -92.0$  ( $c = 0.23$ ,  $\text{CHCl}_3$ );  $^1\text{H}$  NMR (400 MHz,  $\text{CDCl}_3$ )  $\delta$  7.67 (d,  $J = 7.4$  Hz, 1H), 7.55 (t,  $J = 7.8$  Hz, 1H), 7.44 (d,  $J = 7.8$  Hz, 1H), 7.30 – 7.20 (m, 4H), 7.01 (t,  $J = 7.6$  Hz, 2H), 6.97 – 6.91 (m, 1H), 6.82 (t,  $J = 7.7$  Hz, 1H), 6.18 (d,  $J = 8.3$  Hz, 1H), 5.54 (s, 1H), 4.33 – 4.25 (m, 1H), 4.21 – 4.13 (m, 1H), 4.11 – 4.03 (m, 1H), 3.97 – 3.89 (m, 1H), 3.62 (s, 1H), 3.17 (s, 3H), 2.19 (s, 3H), 1.24 (t,  $J = 7.1$  Hz, 3H), 1.15 (t,  $J = 7.1$  Hz, 3H);  $^{13}\text{C}$  NMR (100 MHz,  $\text{CDCl}_3$ )  $\delta$  172.4, 168.0, 167.5, 162.6 ( $J = 246.1$  Hz), 144.1, 135.1, 131.8, 130.6, 129.7 ( $J = 8.2$  Hz), 127.9, 124.7, 123.8, 121.8, 120.4, 118.8, 116.0 ( $J = 22.1$  Hz), 114.4 ( $J = 21.0$  Hz), 110.2, 110.0, 109.1, 72.4, 66.8, 62.5, 62.2, 41.0, 26.0, 13.8, 13.7, 8.1; IR (KBr): 2936, 1613, 1588, 1491, 1471, 1456, 1368, 1335, 1300, 1258, 1239, 1208, 1132, 1095, 1077, 1019  $\text{cm}^{-1}$ ; ESI FTMS exact mass calcd for  $(\text{C}_{32}\text{H}_{30}\text{FN}_3\text{O}_5+\text{Na})^+$  requires  $m/z$  578.2067, found  $m/z$  578.2065; Enantiomeric ratio: 88:12, determined by HPLC (Daicel Chiralpak AD-H, hexane/ isopropanol = 70/30, flow rate 1.0 mL/min,  $T = 30$  °C, 254 nm):  $t_{\text{R}} = 4.30$  min (major),  $t_{\text{R}} = 4.71$  min

(minor).

**(1'S,4'S)-diethyl-4'-(4-fluorophenyl)-1,5'-dimethyl-2-oxo-2'H-spiro[indoline-3,1'-pyrimido[1,6-a]indole]-3',3'(4'H)-dicarboxylate (6fa):**

Flash column chromatography eluent, petroleum ether/ethyl acetate = 4/1; Reaction time = 12 h; yield: 53% (29.4 mg); yellowish solid, m.p. 112.3-114.2 °C;  $[\alpha]_D^{20} = +156.0$  ( $c = 0.30$ ,  $\text{CHCl}_3$ );  $^1\text{H NMR}$  (400 MHz,  $\text{CDCl}_3$ )  $\delta$  7.63 (d,  $J = 7.4$  Hz, 1H), 7.55 (t,  $J = 7.8$  Hz, 1H), 7.50 – 7.39 (m, 3H), 7.21 (t,  $J = 7.6$  Hz, 1H), 7.03 – 6.97 (m, 4H), 6.81 (t,  $J = 7.7$  Hz, 1H), 6.17 (d,  $J = 8.3$  Hz, 1H), 5.53 (s, 1H), 4.33 – 4.25 (m, 1H), 4.21 – 4.12 (m, 1H), 4.11 – 4.00 (m, 1H), 3.94 – 3.84 (m, 1H), 3.59 (s, 1H), 3.17 (s, 3H), 2.17 (s, 3H), 1.23 (t,  $J = 7.1$  Hz, 3H), 1.15 (t,  $J = 7.1$  Hz, 3H);  $^{13}\text{C NMR}$  (100 MHz,  $\text{CDCl}_3$ )  $\delta$  172.4, 168.1, 167.6, 162.0 ( $J = 246.5$  Hz), 144.1, 134.9, 134.8, 132.3, 131.8, 130.6, 130.5, 130.4, 127.9, 124.6, 123.7, 121.7, 120.3, 118.7, 115.2 ( $J = 21.4$  Hz), 110.2, 109.7, 109.1, 72.4, 66.9, 62.5, 62.2, 40.5, 26.0, 13.9, 13.8, 8.0; IR (KBr): 2980, 2918, 1613, 1506, 1495, 1471, 1456, 1368, 1335, 1300, 1238, 1178, 1159, 1094, 1075, 1018, 739  $\text{cm}^{-1}$ ; ESI FTMS exact mass calcd for  $(\text{C}_{32}\text{H}_{30}\text{FN}_3\text{O}_5+\text{Na})^+$  requires  $m/z$  578.2067, found  $m/z$  578.2075; Enantiomeric ratio: 85:15, determined by HPLC (Daicel Chiralpak AD-H, hexane/ isopropanol = 70/30, flow rate 1.0 mL/min, T = 30 °C, 254 nm):  $t_R = 4.07$  min (minor),  $t_R = 5.82$  min (major).

**(1'S,4'S)-diethyl-4'-(4-chlorophenyl)-1,5'-dimethyl-2-oxo-2'H-spiro[indoline-3,1'-pyrimido[1,6-a]indole]-3',3'(4'H)-dicarboxylate (6ga):**

Flash column chromatography eluent, petroleum ether/ethyl acetate = 4/1; Reaction time = 12 h; yield: 45% (25.7 mg); yellowish solid, m.p. 114.8-115.8 °C;  $[\alpha]_D^{20} = +103.5$  ( $c = 0.21$ ,  $\text{CHCl}_3$ );  $^1\text{H NMR}$  (400 MHz,  $\text{CDCl}_3$ )  $\delta$  7.62 (d,  $J = 7.4$  Hz, 1H), 7.55 (t,  $J = 7.8$  Hz, 1H), 7.44 (d,  $J = 8.4$  Hz, 3H), 7.28 (d,  $J = 8.1$  Hz, 2H), 7.22 (t,  $J = 7.6$  Hz, 1H), 7.01 (t,  $J = 8.0$  Hz, 2H), 6.82 (t,  $J = 7.7$  Hz, 1H), 6.18 (d,  $J = 8.3$  Hz, 1H), 5.52 (s, 1H), 4.33 – 4.25 (m, 1H), 4.21 – 4.13 (m, 1H), 4.12 – 4.04 (m, 1H), 3.95 – 3.86 (m, 1H), 3.60 (s, 1H), 3.17 (s, 3H), 2.17 (s, 3H), 1.24 (t,  $J = 7.1$  Hz, 3H), 1.16 (t,  $J = 7.1$  Hz, 3H);  $^{13}\text{C NMR}$  (100 MHz,  $\text{CDCl}_3$ )  $\delta$  172.4, 168.0, 167.5, 144.1, 137.6,

135.0, 133.3, 132.0, 131.8, 130.5, 130.2, 128.5, 127.9, 124.6, 123.7, 121.8, 120.4, 118.8, 110.2, 109.9, 109.2, 72.4, 66.8, 62.5, 62.2, 40.7, 26.0, 13.8, 13.7, 8.1; IR (KBr): 2979, 2918, 1744, 1614, 1557, 1541, 1521, 1490, 1471, 1456, 1337, 1369, 1300, 1258, 1241, 1210, 1094, 1016  $\text{cm}^{-1}$ ; ESI FTMS exact mass calcd for  $(\text{C}_{32}\text{H}_{30}\text{ClN}_3\text{O}_5+\text{H})^+$  requires  $m/z$  572.1952, found  $m/z$  572.1944; Enantiomeric ratio: 80:20, determined by HPLC (Daicel Chiralpak AD-H, hexane/ isopropanol = 70/30, flow rate 1.0 mL/min,  $T = 30\text{ }^\circ\text{C}$ , 254 nm):  $t_{\text{R}} = 4.32$  min (minor),  $t_{\text{R}} = 5.94$  min (major).

**(1'S,4'S)-diethyl-1,5'-dimethyl-2-oxo-4'-(thiophen-2-yl)-2'H-spiro[indoline-3,1'-pyrimido[1,6-a]indole]-3',3'(4'H)-dicarboxylate (6ha):**

Flash column chromatography eluent, petroleum ether/ethyl acetate = 4/1; Reaction time = 12 h; yield: 47% (25.5 mg); yellow solid, m.p. 136.5-138.7  $^\circ\text{C}$ ;  $[\alpha]_{\text{D}}^{20} = +110.9$  ( $c = 0.34$ ,  $\text{CHCl}_3$ );  $^1\text{H}$  NMR (400 MHz,  $\text{CDCl}_3$ )  $\delta$  7.85 (d,  $J = 7.4$  Hz, 1H), 7.52 (t,  $J = 7.8$  Hz, 1H), 7.44 (d,  $J = 7.8$  Hz, 1H), 7.20 (t,  $J = 7.1$  Hz, 2H), 7.04 (d,  $J = 3.4$  Hz, 1H), 7.02 – 6.96 (m, 2H), 6.94 – 6.89 (m, 1H), 6.81 (t,  $J = 7.7$  Hz, 1H), 6.16 (d,  $J = 8.3$  Hz, 1H), 5.83 (s, 1H), 4.34 – 4.26 (m, 1H), 4.20 – 4.11 (m, 2H), 4.06 – 3.97 (m, 1H), 3.76 (s, 1H), 3.16 (s, 3H), 2.27 (s, 3H), 1.23 (t,  $J = 7.1$  Hz, 3H), 1.18 (t,  $J = 7.1$  Hz, 3H);  $^{13}\text{C}$  NMR (100 MHz,  $\text{CDCl}_3$ )  $\delta$  172.4, 167.7, 167.4, 144.0, 141.3, 135.2, 132.3, 131.6, 130.5, 128.1, 126.2, 126.0, 125.4, 125.3, 123.7, 121.8, 120.3, 118.8, 110.3, 109.9, 108.9, 72.5, 66.9, 62.6, 62.2, 37.6, 26.0, 13.9, 13.8, 8.0; IR (KBr): 2921, 1869, 1845, 1793, 1743, 1685, 1559, 1541, 1508, 1473, 1457, 1339, 1259  $\text{cm}^{-1}$ ; ESI FTMS exact mass calcd for  $(\text{C}_{30}\text{H}_{29}\text{N}_3\text{O}_5\text{S}+\text{H})^+$  requires  $m/z$  544.1906, found  $m/z$  544.1903; Enantiomeric ratio: 80:20, determined by HPLC (Daicel Chiralpak AD-H, hexane/ isopropanol = 70/30, flow rate 1.0 mL/min,  $T = 30\text{ }^\circ\text{C}$ , 254 nm):  $t_{\text{R}} = 4.28$  min (minor),  $t_{\text{R}} = 6.45$  min (major).

**(1'S,4'S)-diethyl-5-bromo-1,5'-dimethyl-2-oxo-4'-(o-tolyl)-2'H-spiro[indoline-3,1'-pyrimido[1,6-a]indole]-3',3'(4'H)-dicarboxylate (6ia):**

Flash column chromatography eluent, petroleum ether/ethyl acetate = 4/1; Reaction time = 12 h; yield: 60% (37.7 mg); yellowish solid, m.p. 76.9-78.1  $^\circ\text{C}$ ;  $[\alpha]_{\text{D}}^{20} =$

+120.5 (c = 0.60, CHCl<sub>3</sub>); <sup>1</sup>H NMR (400 MHz, CDCl<sub>3</sub>) δ 7.68 (d, *J* = 7.4 Hz, 1H), 7.60 – 7.50 (m, 3H), 7.24 (d, *J* = 7.6 Hz, 1H), 7.18 – 7.10 (m, 3H), 7.03 (d, *J* = 7.8 Hz, 1H), 6.86 (d, *J* = 8.7 Hz, 1H), 5.98 (d, *J* = 7.9 Hz, 2H), 4.32 – 4.25 (m, 1H), 4.20 – 4.15 (m, 1H), 3.98 – 3.89 (m, 1H), 3.81 (s, 1H), 3.72 – 3.64 (m, 1H), 3.17 (s, 3H), 2.68 (s, 3H), 2.07 (s, 3H), 1.23 (t, *J* = 7.0 Hz, 3H), 1.03 (t, *J* = 7.1 Hz, 3H); <sup>13</sup>C NMR (100 MHz, CDCl<sub>3</sub>) δ 172.1, 168.3, 167.4, 144.1, 137.2, 135.6, 135.0, 133.4, 132.3, 132.0, 130.5, 128.8, 127.5, 127.3, 126.4, 124.5, 124.0, 123.9, 121.1, 113.7, 111.6, 109.3, 109.1, 72.0, 66.7, 62.5, 62.3, 26.1, 20.2, 13.9, 13.5, 8.1; IR (KBr): 2979, 2929, 1743, 1613, 1560, 1577, 1492, 1470, 1456, 1368, 1340, 1300, 1254, 1238, 1207, 1095, 1058, 1018 cm<sup>-1</sup>; ESI FTMS exact mass calcd for (C<sub>33</sub>H<sub>32</sub>BrN<sub>3</sub>O<sub>5</sub>+H)<sup>+</sup> requires *m/z* 630.1603, found *m/z* 630.1601; Enantiomeric ratio: 80:20, determined by HPLC (Daicel Chiralpak AD-H, hexane/ isopropanol = 70/30, flow rate 1.0 mL/min, T = 30 °C, 254 nm): *t<sub>R</sub>* = 4.19 min (minor), *t<sub>R</sub>* = 6.71 min (major).

**(1'*S*,4'*S*)-diethyl-8'-chloro-1,5'-dimethyl-2-oxo-4'-(*o*-tolyl)-2'*H*-spiro[indoline-3,1'-pyrimido[1,6-*a*]indole]-3',3'(4'*H*)-dicarboxylate (6ja):**

Flash column chromatography eluent, petroleum ether/ethyl acetate = 4/1; Reaction time = 12 h; yield: 56% (32.8 mg); yellow solid, m.p. 157.7-158.6 °C; [ $\alpha$ ]<sub>D</sub><sup>20</sup> = +192.2 (c = 0.31, CHCl<sub>3</sub>); <sup>1</sup>H NMR (400 MHz, CDCl<sub>3</sub>) δ 7.70 (d, *J* = 7.4 Hz, 1H), 7.62 – 7.54 (m, 2H), 7.31 – 7.25 (m, 2H), 7.18 – 7.08 (m, 3H), 7.05 (d, *J* = 7.9 Hz, 1H), 6.94 (d, *J* = 8.4 Hz, 1H), 6.07 (s, 1H), 5.96 (s, 1H), 4.34 – 4.25 (m, 1H), 4.22 – 4.14 (m, 1H), 3.98 – 3.89 (m, 1H), 3.81 (s, 1H), 3.73 – 3.64 (m, 1H), 3.19 (s, 3H), 2.68 (s, 3H), 2.09 (s, 3H), 1.26 – 1.22 (t, *J* = 7.0 Hz, 3H), 1.02 (t, *J* = 7.1 Hz, 3H); <sup>13</sup>C NMR (100 MHz, CDCl<sub>3</sub>) δ 172.1, 168.3, 167.5, 144.1, 137.3, 135.6, 135.1, 134.3, 132.1, 130.5, 129.1, 128.8, 127.4, 127.3, 127.0, 126.4, 124.5, 123.9, 120.8, 119.2, 110.4, 109.6, 109.4, 72.0, 66.6, 62.5, 62.3, 35.5, 26.1, 20.2, 13.9, 13.5, 8.1; IR (KBr): 3732, 2919, 1742, 1614, 1540, 1557, 1494, 1506, 1520, 1470, 1369, 1327, 1301, 1238, 1260, 1208, 1073 cm<sup>-1</sup>; ESI FTMS exact mass calcd for (C<sub>33</sub>H<sub>32</sub>ClN<sub>3</sub>O<sub>5</sub>+Na)<sup>+</sup> requires *m/z* 608.1928, found *m/z* 608.1930; Enantiomeric ratio: 80:20, determined by HPLC (Daicel Chiralpak AD-H, hexane/ isopropanol = 70/30, flow rate 1.0 mL/min, T = 30



°C, 254 nm):  $t_R = 3.95$  min (minor),  $t_R = 9.77$  min (major).

**(1'S,4'S)-diethyl-4'-(4-methoxyphenyl)-1-methyl-2-oxo-5'-propyl-2'H-spiro[indoline-3,1'-pyrimido[1,6-a]indole]-3',3'(4'H)-dicarboxylate (6ka):**

Flash column chromatography eluent, petroleum ether/ethyl acetate = 4/1; Reaction time = 12 h; yield: 85% (50.6 mg); yellowish solid, m.p. 102.8-104.3 °C;  $[\alpha]_D^{20} = +127.2$  (c = 0.81, CHCl<sub>3</sub>); <sup>1</sup>H NMR (400 MHz, CDCl<sub>3</sub>) δ 7.66 (d, *J* = 7.4 Hz, 1H), 7.53 (t, *J* = 7.8 Hz, 1H), 7.47 (d, *J* = 7.8 Hz, 1H), 7.36 (d, *J* = 8.5 Hz, 2H), 7.20 (t, *J* = 7.6 Hz, 1H), 7.02 – 6.96 (m, 2H), 6.83 – 6.78 (m, 3H), 6.19 (d, *J* = 8.3 Hz, 1H), 5.50 (s, 1H), 4.30 (m, 1H), 4.19 – 4.13 (m, 1H), 4.13 – 4.07 (m, 1H), 3.95 – 3.90 (m, 1H), 3.77 (s, 3H), 3.61 (s, 1H), 3.17 (s, 3H), 2.69 – 2.61 (m, 2H), 1.55 – 1.47 (m, 1H), 1.24 (t, *J* = 7.1 Hz, 3H), 1.19 (t, *J* = 7.1 Hz, 3H), 0.82 (t, *J* = 7.3 Hz, 3H); <sup>13</sup>C NMR (100 MHz, CDCl<sub>3</sub>) δ 172.3, 168.1, 167.7, 158.8, 144.1, 135.0, 132.8, 131.8, 131.7, 130.2, 129.9, 128.1, 124.5, 123.6, 121.4, 120.1, 119.0, 114.4, 113.6, 110.2, 109.1, 72.4, 67.1, 62.4, 62.1, 55.1, 40.5, 26.1, 26.0, 23.0, 14.3, 13.9, 13.8; IR (KBr): 1743, 1613, 1510, 1494, 1470, 1456, 1368, 1329, 1301, 1244, 1210, 1176, 1092, 1076, 1037, 1022, 740 cm<sup>-1</sup>; ESI FTMS exact mass calcd for (C<sub>35</sub>H<sub>37</sub>N<sub>3</sub>O<sub>6</sub>+H)<sup>+</sup> requires m/z 596.2760, found m/z 596.2765; Enantiomeric ratio: 86:14, determined by HPLC (Daicel Chiralpak AD-H, hexane/ isopropanol = 70/30, flow rate 1.0 mL/min, T = 30 °C, 254 nm):  $t_R = 3.94$  min (minor),  $t_R = 4.62$  min (major).

**(1'S,4'S)-diethyl-5'-(4-chlorophenyl)-4'-(4-methoxyphenyl)-1-methyl-2-oxo-2'H-spiro[indoline-3,1'-pyrimido[1,6-a]indole]-3',3'(4'H)-dicarboxylate (6la):**

Flash column chromatography eluent, petroleum ether/ethyl acetate = 4/1; Reaction time = 12 h; yield: 74% (49.1 mg); yellowish solid, m.p. 131.5-133.1 °C;  $[\alpha]_D^{20} = +72.6$  (c = 0.76, CHCl<sub>3</sub>); <sup>1</sup>H NMR (400 MHz, CDCl<sub>3</sub>) δ 7.75 – 7.70 (m, 1H), 7.56 (t, *J* = 7.8 Hz, 1H), 7.51 – 7.44 (m, 1H), 7.40 – 7.32 (m, 4H), 7.23 (t, *J* = 8.6 Hz, 3H), 7.06 – 6.99 (m, 2H), 6.90 – 6.84 (m, 1H), 6.81 – 6.75 (m, 2H), 6.28 (d, *J* = 8.3 Hz, 1H), 5.54 (d, *J* = 21.7 Hz, 1H), 4.34 – 4.26 (m, 1H), 4.17 – 4.05 (m, 2H), 3.96 – 3.88 (m, 1H), 3.76 (s, 3H), 3.64 (s, 1H), 3.20 (s, 3H), 1.22 (t, *J* = 7.1 Hz, 3H), 1.14 (t, *J* =

7.0 Hz, 3H);  $^{13}\text{C}$  NMR (100 MHz,  $\text{CDCl}_3$ )  $\delta$  172.1, 168.1, 167.7, 158.8, 144.2, 135.0, 133.8, 132.6, 132.1, 132.0, 131.5, 131.2, 129.9, 129.7, 129.3, 128.5, 128.3, 127.8, 124.6, 123.8, 122.2, 121.2, 119.2, 115.0, 113.7, 110.4, 109.3, 72.9, 67.0, 62.5, 62.1, 55.1, 40.7, 26.1, 13.9; IR (KBr): 3646, 3626, 3564, 3585, 3445, 1732, 1746, 1668, 1682, 1645, 1634, 1398, 669  $\text{cm}^{-1}$ ; ESI FTMS exact mass calcd for  $(\text{C}_{38}\text{H}_{34}\text{ClN}_3\text{O}_6+\text{Na})^+$  requires  $m/z$  686.2034, found  $m/z$  686.2017; Enantiomeric ratio: 93:7, determined by HPLC (Daicel Chiralpak AD-H, hexane/ isopropanol = 98/2, flow rate 1.0 mL/min, T = 30 °C, 254 nm):  $t_R$  = 38.42 min (major),  $t_R$  = 46.63 min (minor).

**(1'S,4'S)-diethyl-1,5,5'-trimethyl-2-oxo-4'-phenyl-2'H-spiro[indoline-3,1'-pyrimidino[1,6-a]indole]-3',3'(4'H)-dicarboxylate (6ab):**

Flash column chromatography eluent, petroleum ether/ethyl acetate = 4/1; Reaction time = 12 h; yield: 42% (23.2 mg); yellowish solid, m.p. 133.9-135.1 °C;  $[\alpha]_D^{20}$  = +154.7 (c = 0.32,  $\text{CHCl}_3$ );  $^1\text{H}$  NMR (400 MHz,  $\text{CDCl}_3$ )  $\delta$  7.48 (d,  $J$  = 6.9 Hz, 3H), 7.44 (d,  $J$  = 7.9 Hz, 1H), 7.34 – 7.28 (m, 3H), 7.23 (d,  $J$  = 7.0 Hz, 1H), 7.00 (t,  $J$  = 7.5 Hz, 1H), 6.90 (d,  $J$  = 7.9 Hz, 1H), 6.82 (t,  $J$  = 7.7 Hz, 1H), 6.21 (d,  $J$  = 8.3 Hz, 1H), 5.55 (s, 1H), 4.35 – 4.27 (m, 1H), 4.20 – 4.12 (m, 1H), 4.10 – 4.02 (m, 1H), 3.93 – 3.85 (m, 1H), 3.62 (s, 1H), 3.15 (s, 3H), 2.38 (s, 3H), 2.18 (s, 3H), 1.24 (t,  $J$  = 7.1 Hz, 3H), 1.16 (t,  $J$  = 7.1 Hz, 3H);  $^{13}\text{C}$  NMR (100 MHz,  $\text{CDCl}_3$ )  $\delta$  172.4, 168.2, 167.7, 141.7, 139.1, 134.9, 133.3, 132.5, 131.9, 130.6, 128.9, 128.3, 128.0, 127.4, 125.3, 121.5, 120.2, 118.6, 110.2, 109.5, 108.9, 72.5, 67.0, 62.4, 62.1, 41.3, 26.1, 21.2, 13.9, 13.8, 8.0; IR (KBr): 2968, 2920, 1742, 1603, 1501, 1456, 1360, 1327, 1293, 1257, 1242, 1198, 1159, 1103, 1076, 1020, 749, 705  $\text{cm}^{-1}$ ; ESI FTMS exact mass calcd for  $(\text{C}_{33}\text{H}_{33}\text{N}_3\text{O}_5+\text{H})^+$  requires  $m/z$  552.2498, found  $m/z$  552.2490; Enantiomeric ratio: 96:4, determined by HPLC (Daicel Chiralpak AD-H, hexane/ isopropanol = 70/30, flow rate 1.0 mL/min, T = 30 °C, 254 nm):  $t_R$  = 3.70 min (minor),  $t_R$  = 5.29 min (major).

**(1'S,4'S)-diethyl-5-methoxy-1,5'-dimethyl-2-oxo-4'-phenyl-2'H-spiro[indoline-3,1'**

**'-pyrimido[1,6-a]indole]-3',3'(4'H)-dicarboxylate (6ac):**

Flash column chromatography eluent, petroleum ether/ethyl acetate = 4/1; Reaction time = 12 h; yield: 64% (36.3 mg); yellowish solid, m.p. 130.3-132.0 °C;  $[\alpha]_D^{20} = +185.9$  (c = 0.22, CHCl<sub>3</sub>); <sup>1</sup>H NMR (400 MHz, CDCl<sub>3</sub>) δ 7.45 (t, *J* = 8.1 Hz, 3H), 7.31 – 7.26 (m, 3H), 7.22 (t, *J* = 7.2 Hz, 1H), 7.06 – 6.98 (m, 2H), 6.92 (d, *J* = 8.5 Hz, 1H), 6.83 (t, *J* = 7.7 Hz, 1H), 6.23 (d, *J* = 8.3 Hz, 1H), 5.53 (s, 1H), 4.35 – 4.27 (m, 1H), 4.19 – 4.11 (m, 1H), 4.09 – 4.01 (m, 1H), 3.93 – 3.87 (m, 1H), 3.82 (s, 3H), 3.60 (s, 1H), 3.15 (s, 3H), 2.18 (s, 3H), 1.23 (t, *J* = 7.1 Hz, 3H), 1.14 (t, *J* = 7.1 Hz, 3H); <sup>13</sup>C NMR (100 MHz, CDCl<sub>3</sub>) δ 172.3, 168.1, 167.6, 156.6, 139.0, 137.4, 134.9, 132.4, 130.6, 129.2, 128.9, 128.3, 127.4, 121.6, 120.2, 118.7, 115.8, 111.9, 110.2, 109.6, 109.5, 72.6, 67.0, 62.4, 62.1, 55.8, 41.3, 26.1, 13.8, 13.7, 8.0; IR (KBr): 3735, 2923, 1743, 1604, 1558, 1541, 1498, 1457, 1337, 1363, 1288, 1259, 1240, 1220, 1158, 1076, 1103, 1032 cm<sup>-1</sup>; ESI FTMS exact mass calcd for (C<sub>33</sub>H<sub>33</sub>N<sub>3</sub>O<sub>6</sub>+H)<sup>+</sup> requires *m/z* 568.2447, found *m/z* 568.2447; Enantiomeric ratio: 90:10, determined by HPLC (Daicel Chiralpak AD-H, hexane/ isopropanol = 70/30, flow rate 1.0 mL/min, T = 30 °C, 254 nm): *t<sub>R</sub>* = 4.22 min (minor), *t<sub>R</sub>* = 6.36 min (major).

**(1'S,4'S)-diethyl-1,5',7-trimethyl-2-oxo-4'-phenyl-2'H-spiro[indoline-3,1'-pyrimid o[1,6-a]indole]-3',3'(4'H)-dicarboxylate (6ad):**

Flash column chromatography eluent, petroleum ether/ethyl acetate = 4/1; Reaction time = 12 h; yield: 60% (33.1 mg); yellowish solid, m.p. 122.9-124.0 °C;  $[\alpha]_D^{20} = +146.1$  (c = 0.43, CHCl<sub>3</sub>); <sup>1</sup>H NMR (400 MHz, CDCl<sub>3</sub>) δ 7.51 (d, *J* = 7.4 Hz, 1H), 7.43 (d, *J* = 6.8 Hz, 3H), 7.30 – 7.19 (m, 4H), 7.09 (t, *J* = 7.6 Hz, 1H), 6.99 (t, *J* = 7.5 Hz, 1H), 6.83 (t, *J* = 7.7 Hz, 1H), 6.25 (d, *J* = 8.3 Hz, 1H), 5.55 (s, 1H), 4.34 – 4.26 (m, 1H), 4.18 – 4.11 (m, 1H), 4.07 – 3.98 (m, 1H), 3.90 – 3.81 (m, 1H), 3.58 (s, 1H), 3.42 (s, 3H), 2.67 (s, 3H), 2.16 (s, 3H), 1.24 (t, *J* = 7.4 Hz, 3H), 1.12 (t, *J* = 7.1 Hz, 3H); <sup>13</sup>C NMR (100 MHz, CDCl<sub>3</sub>) δ 173.1, 168.1, 167.6, 141.7, 139.0, 135.3, 135.0, 132.5, 130.6, 128.9, 128.8, 128.3, 127.4, 123.7, 122.4, 121.5, 120.9, 120.2, 118.7, 110.3, 109.7, 71.8, 67.1, 62.4, 62.1, 41.3, 29.4, 19.1, 13.8, 13.7, 8.0; IR (KBr): 2978, 2921, 1601, 1522, 1491, 1459, 1357, 1327, 1298, 1244, 1210, 1168, 1104, 1052, 734

cm<sup>-1</sup>; ESI FTMS exact mass calcd for (C<sub>33</sub>H<sub>33</sub>N<sub>3</sub>O<sub>5</sub>+H)<sup>+</sup> requires m/z 552.2498, found m/z 552.2517 Enantiomeric ratio: 86:14, determined by HPLC (Daicel Chiralpak AD-H, hexane/ isopropanol = 70/30, flow rate 1.0 mL/min, T = 30 °C, 254 nm): t<sub>R</sub> = 3.94 min (minor), t<sub>R</sub> = 5.17 min (major).

**(1'S,4'S)-diethyl-7-methoxy-1,5'-dimethyl-2-oxo-4'-phenyl-2'H-spiro[indoline-3,1'-pyrimido[1,6-a]indole]-3',3'(4'H)-dicarboxylate (6ae):**

Flash column chromatography eluent, petroleum ether/ethyl acetate = 4/1; Reaction time = 12 h; yield: 53% (30.1 mg); yellowish solid, m.p. 138.2-139.1 °C; [α]<sub>D</sub><sup>20</sup> = +94.8 (c = 0.71, CHCl<sub>3</sub>); <sup>1</sup>H NMR (400 MHz, CDCl<sub>3</sub>) δ 7.47 – 7.42 (m, 3H), 7.29 (t, J = 6.8 Hz, 3H), 7.23 (t, J = 7.2 Hz, 1H), 7.15 (t, J = 7.8 Hz, 1H), 7.10 (d, J = 8.3 Hz, 1H), 7.01 (t, J = 7.5 Hz, 1H), 6.85 (t, J = 7.7 Hz, 1H), 6.32 (d, J = 8.2 Hz, 1H), 5.55 (s, 1H), 4.33 – 4.25 (m, 1H), 4.21 – 4.13 (m, 1H), 4.07 – 4.00 (m, 1H), 3.96 (s, 3H), 3.90 – 3.84 (m, 1H), 3.60 (s, 1H), 3.43 (s, 3H), 2.18 (s, 3H), 1.25 (t, J = 7.1 Hz, 3H), 1.13 (t, J = 7.1 Hz, 3H); <sup>13</sup>C NMR (100 MHz, CDCl<sub>3</sub>) δ 172.7, 168.1, 167.6, 145.9, 139.1, 135.0, 132.5, 131.9, 130.6, 129.5, 128.9, 128.3, 127.4, 124.4, 121.5, 120.2, 118.6, 116.8, 115.4, 110.3, 109.6, 72.2, 67.0, 62.4, 62.1, 56.2, 41.3, 29.4, 13.8, 13.7, 8.1; IR (KBr): 2979, 2934, 1743, 1616, 1603, 1494, 1457, 1362, 1326, 1290, 1259, 1209, 1168, 1128, 1110, 1052, 737 cm<sup>-1</sup>; ESI FTMS exact mass calcd for (C<sub>33</sub>H<sub>33</sub>N<sub>3</sub>O<sub>6</sub>+Na)<sup>+</sup> requires m/z 590.2267, found m/z 590.2256; Enantiomeric ratio: 78:22, determined by HPLC (Daicel Chiralpak AD-H, hexane/ isopropanol = 70/30, flow rate 1.0 mL/min, T = 30 °C, 254 nm): t<sub>R</sub> = 3.79 min (minor), t<sub>R</sub> = 4.70 min (major).

**(1'S,4'S)-diethyl-7-fluoro-1,5'-dimethyl-2-oxo-4'-phenyl-2'H-spiro[indoline-3,1'-pyrimido[1,6-a]indole]-3',3'(4'H)-dicarboxylate (6af):**

Flash column chromatography eluent, petroleum ether/ethyl acetate = 4/1; Reaction time = 12 h; yield: 52% (28.9 mg); yellowish solid, m.p. 122.5-123.2 °C; [α]<sub>D</sub><sup>20</sup> = +112.4 (c = 0.52, CHCl<sub>3</sub>); <sup>1</sup>H NMR (400 MHz, CDCl<sub>3</sub>) δ 7.51 – 7.44 (m, 4H), 7.30 (t, J = 7.5 Hz, 3H), 7.25 – 7.13 (m, 2H), 7.03 (t, J = 7.5 Hz, 1H), 6.88 (t, J = 7.7 Hz,

1H), 6.26 (d,  $J = 8.3$  Hz, 1H), 5.56 (s, 1H), 4.34 – 4.27 (m, 1H), 4.21 – 4.13 (m, 1H), 4.11 – 4.03 (m, 1H), 3.92 – 3.85 (m, 1H), 3.62 (s, 1H), 3.39 (d,  $J = 1.4$  Hz, 3H), 2.19 (s, 3H), 1.26 (t,  $J = 7.1$  Hz, 3H), 1.15 (t,  $J = 7.1$  Hz, 3H);  $^{13}\text{C}$  NMR (100 MHz,  $\text{CDCl}_3$ )  $\delta$  172.2, 168.0, 167.5, 148.0 ( $J = 245.4$  Hz), 138.9, 134.9, 132.3, 131.0, 130.8, 130.6, 128.9, 128.3, 127.5, 124.5 ( $J = 6.3$  Hz), 124.4, 121.8, 120.4, 119.8 ( $J = 19.3$  Hz), 118.8, 110.1, 110.0, 72.3, 66.9, 62.5, 62.2, 41.3, 13.8, 13.7, 8.0; IR (KBr): 3691, 2979, 1869, 1845, 1793, 1746, 1685, 1559, 1541, 1522, 1508, 1489, 1457, 1364, 1325, 1260, 1242, 1210  $\text{cm}^{-1}$ ; ESI FTMS exact mass calcd for  $(\text{C}_{32}\text{H}_{30}\text{FN}_3\text{O}_5+\text{H})^+$  requires  $m/z$  556.2247, found  $m/z$  556.2244; Enantiomeric ratio: 76:24, determined by HPLC (Daicel Chiralpak AD-H, hexane/ isopropanol = 70/30, flow rate 1.0 mL/min,  $T = 30$  °C, 254 nm):  $t_{\text{R}} = 3.79$  min (minor),  $t_{\text{R}} = 5.34$  min (major).

**(1'S,4'S)-diethyl-1,5,5'-trimethyl-2-oxo-4'-(*m*-tolyl)-2'H-spiro[indoline-3,1'-pyrimido[1,6-*a*]indole]-3',3'(4'H)-dicarboxylate (6mb):**

Flash column chromatography eluent, petroleum ether/ethyl acetate = 4/1; Reaction time = 12 h; yield: 59% (33.4 mg); yellowish solid, m.p. 71.9-73.0 °C;  $[\alpha]_{\text{D}}^{20} = +88.5$  ( $c = 0.26$ ,  $\text{CHCl}_3$ );  $^1\text{H}$  NMR (400 MHz,  $\text{CDCl}_3$ )  $\delta$  7.48 (s, 1H), 7.45 (d,  $J = 7.8$  Hz, 1H), 7.32 (d,  $J = 8.0$  Hz, 1H), 7.28 (s, 1H), 7.24 – 7.16 (m, 2H), 7.06 – 6.98 (m, 2H), 6.90 (d,  $J = 7.9$  Hz, 1H), 6.82 (t,  $J = 7.7$  Hz, 1H), 6.23 (d,  $J = 8.3$  Hz, 1H), 5.49 (s, 1H), 4.36 – 4.27 (m, 1H), 4.19 – 4.11 (m, 1H), 4.10 – 4.03 (m, 1H), 3.95 – 3.86 (m, 1H), 3.59 (s, 1H), 3.16 (s, 3H), 2.35 (d,  $J = 8.3$  Hz, 6H), 2.18 (s, 3H), 1.23 (t,  $J = 7.1$  Hz, 3H), 1.18 (t,  $J = 7.1$  Hz, 3H);  $^{13}\text{C}$  NMR (100 MHz,  $\text{CDCl}_3$ )  $\delta$  172.4, 168.1, 167.7, 141.7, 138.8, 137.6, 134.8, 133.2, 132.5, 131.8, 130.6, 129.6, 128.2, 128.1, 126.0, 125.2, 121.4, 120.1, 118.6, 110.2, 108.9, 72.4, 67.1, 62.3, 62.1, 41.3, 26.1, 21.5, 21.2, 13.9, 13.8, 8.1; IR (KBr): 2920, 1869, 1846, 1793, 1743, 1686, 1604, 1559, 1542, 1522, 1500, 1458, 1363, 1338, 1296, 1259, 1241, 1207  $\text{cm}^{-1}$ ; ESI FTMS exact mass calcd for  $(\text{C}_{34}\text{H}_{35}\text{N}_3\text{O}_5+\text{H})^+$  requires  $m/z$  566.2655, found  $m/z$  566.2655; Enantiomeric ratio: 75:25, determined by HPLC (Daicel Chiralpak AD-H, hexane/ isopropanol = 70/30, flow rate 1.0 mL/min,  $T = 30$  °C, 254 nm):  $t_{\text{R}} = 3.74$  min (minor),  $t_{\text{R}} = 4.54$  min (major).



## 4. NMR spectra of products 6

### 6aa

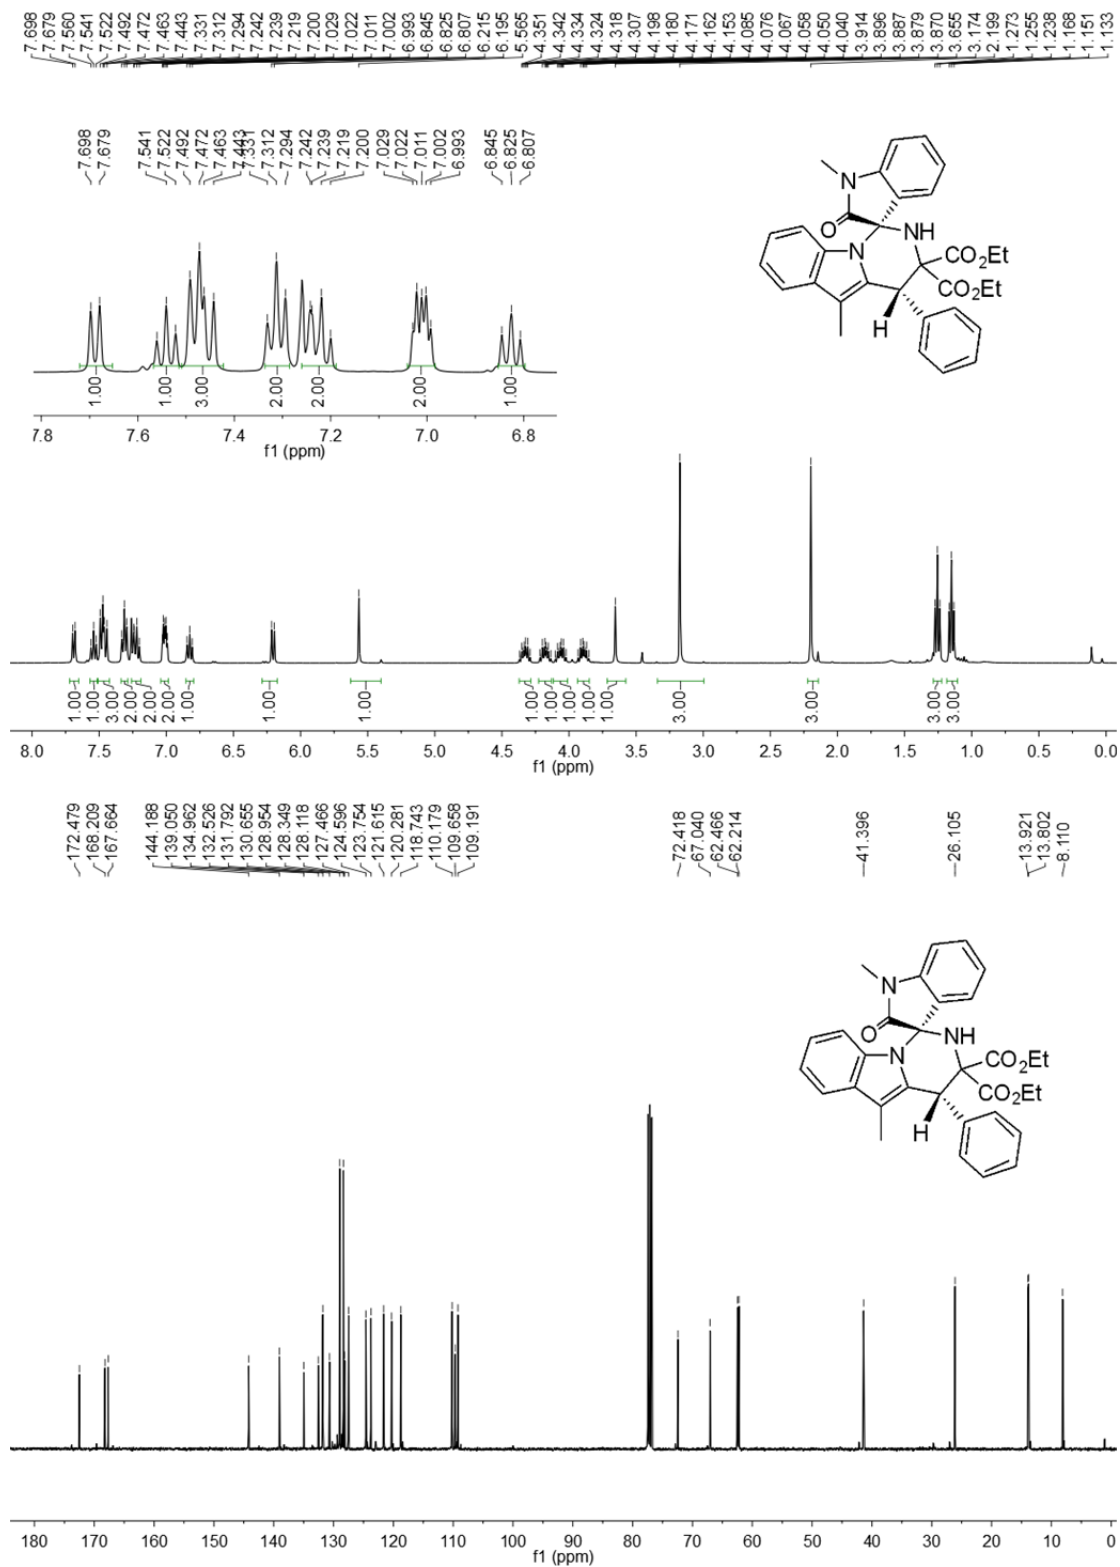

**ent-6ba**

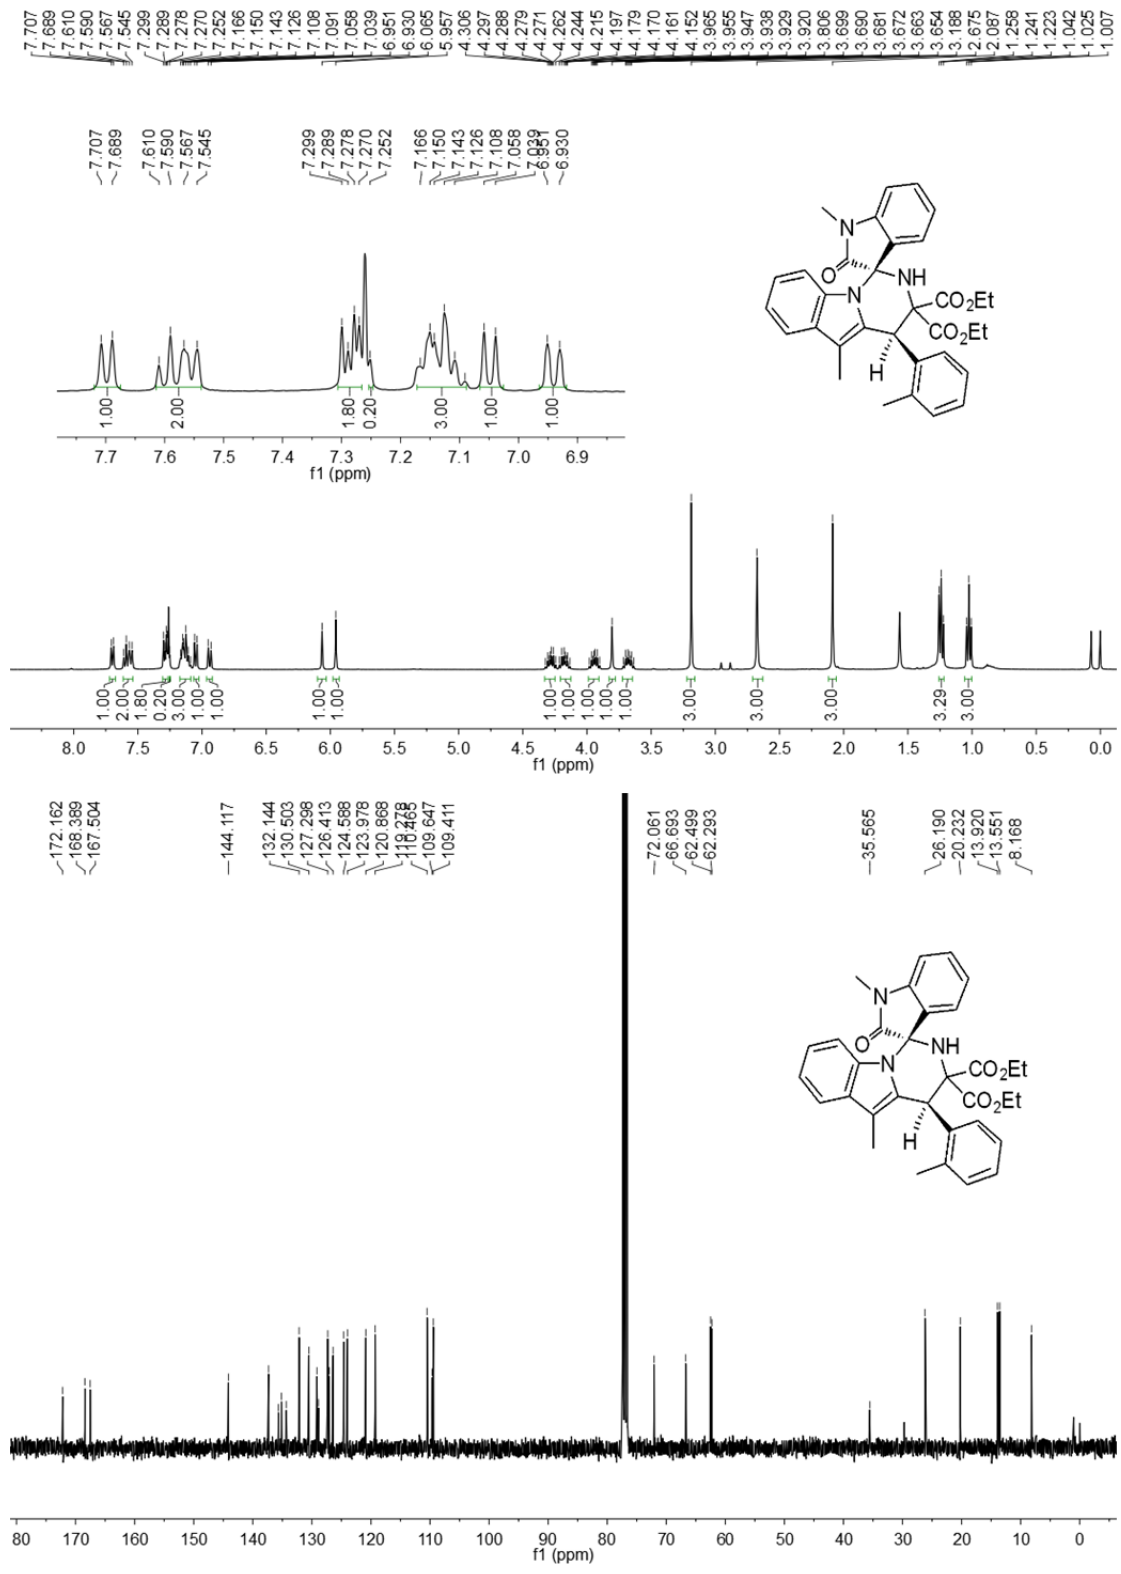



6ca

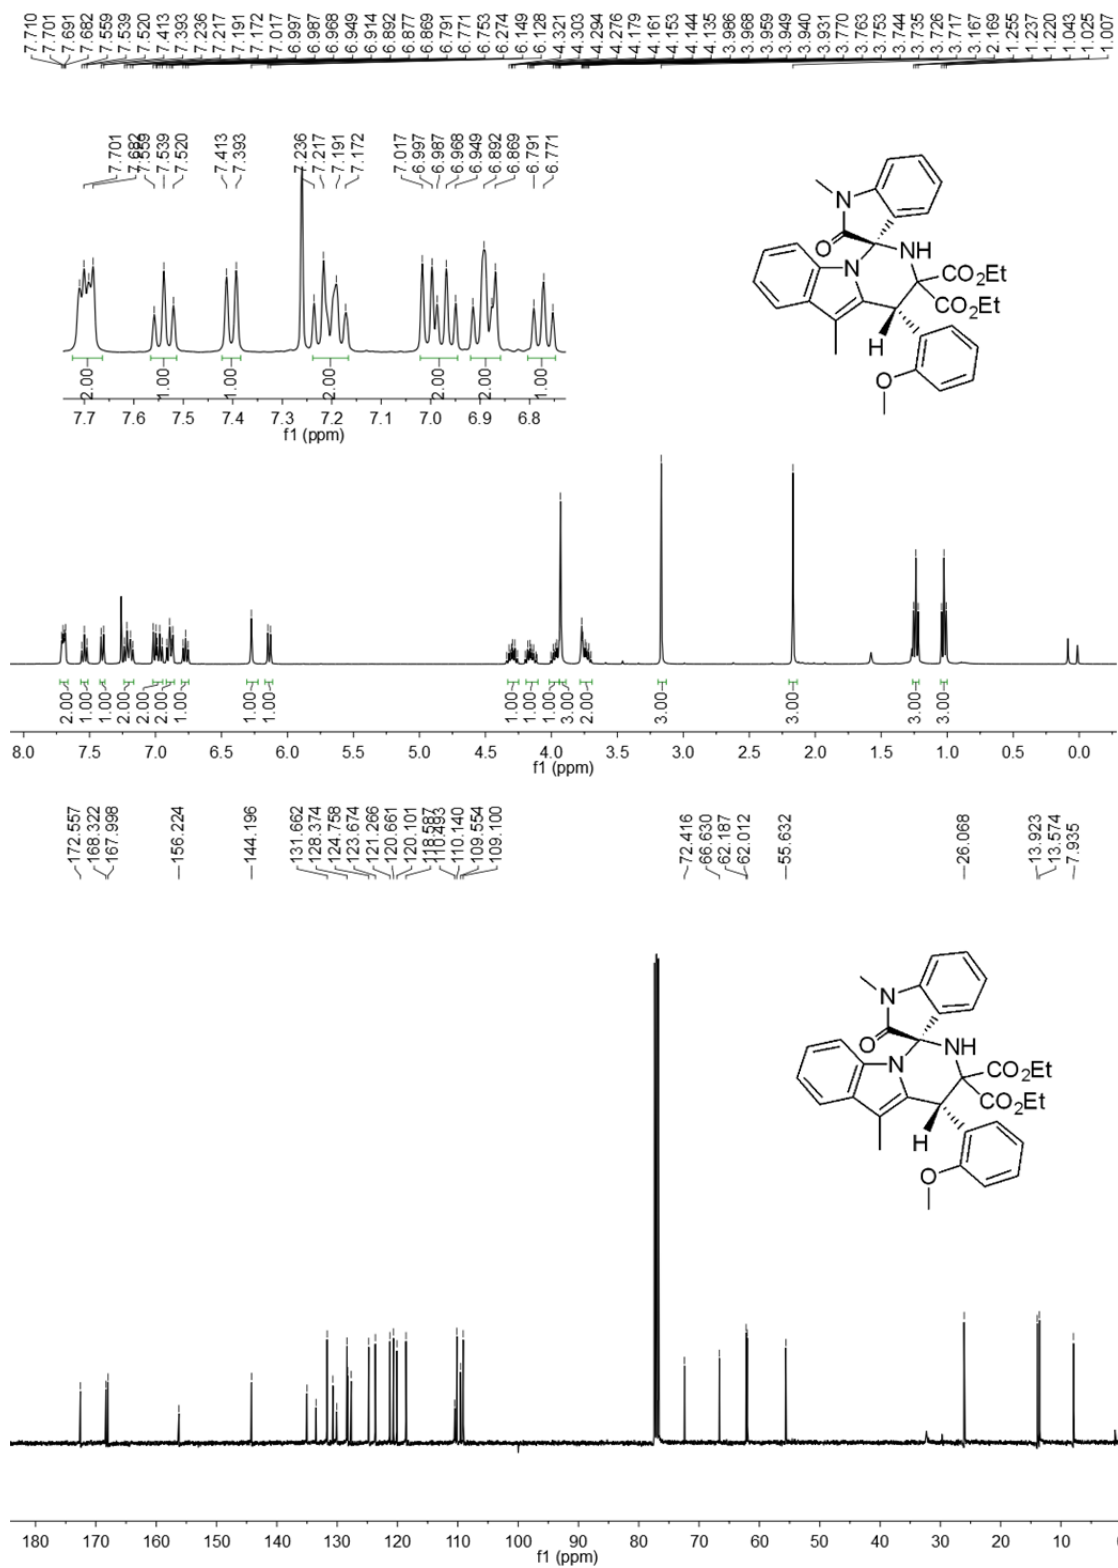

**ent-6da**

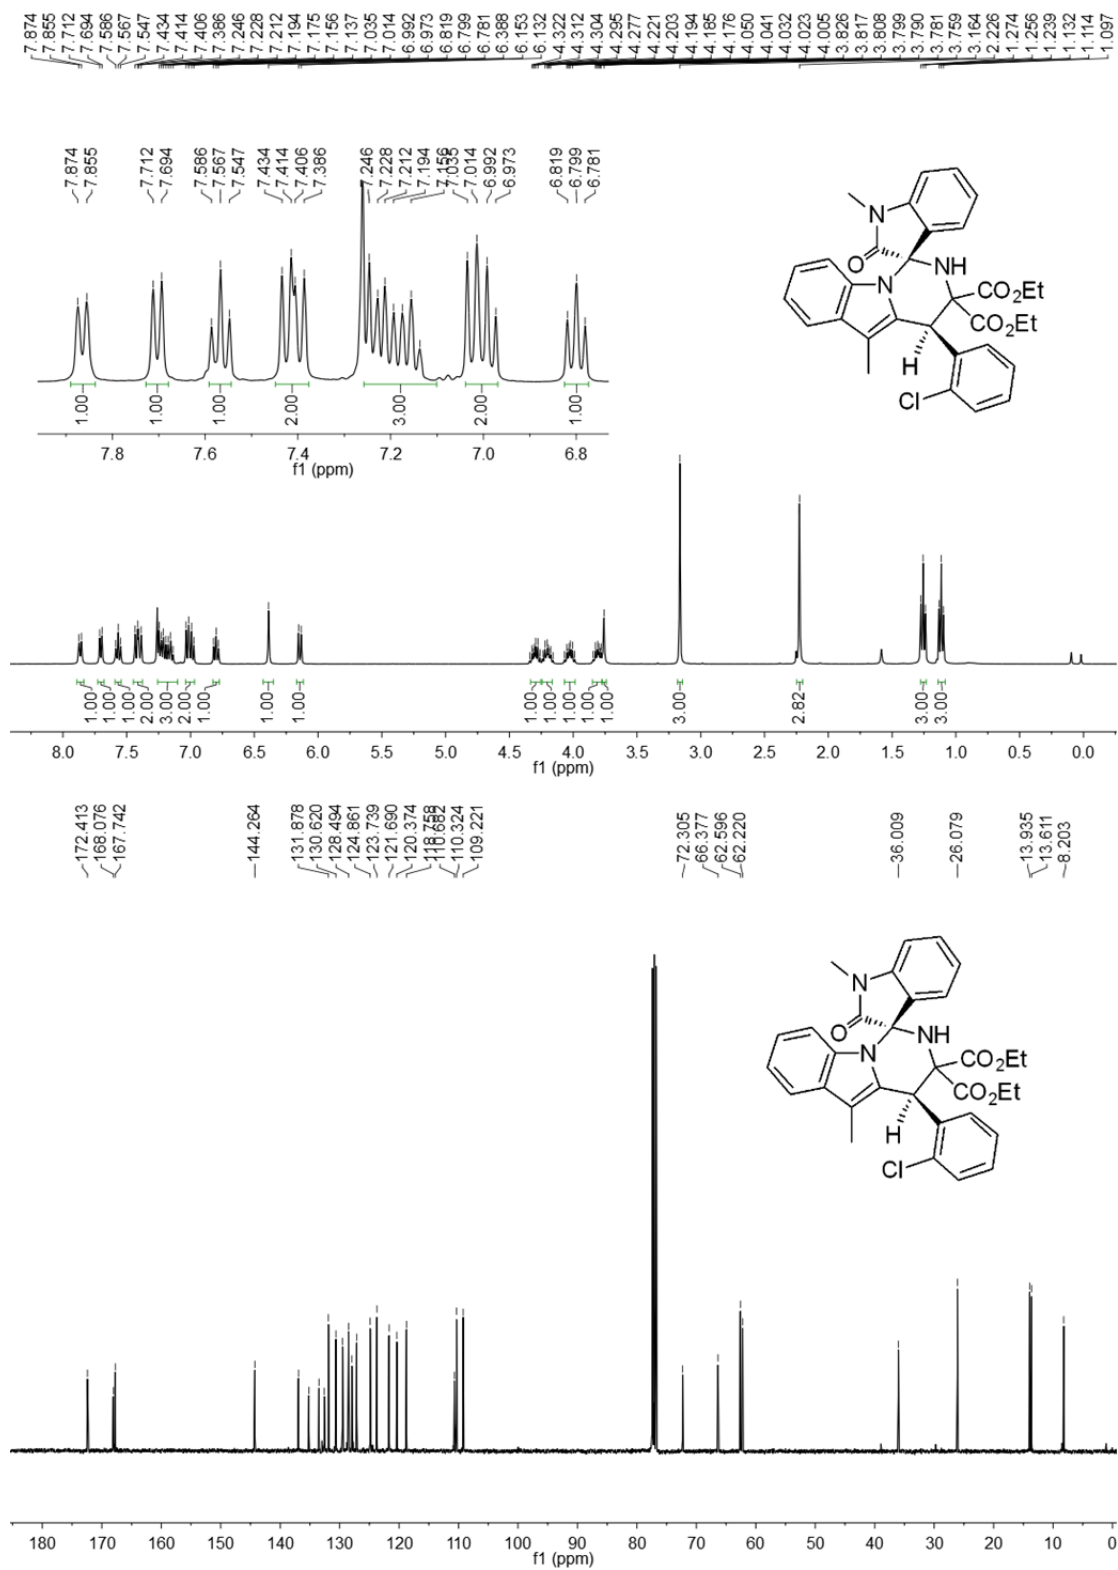

**ent-6ea**

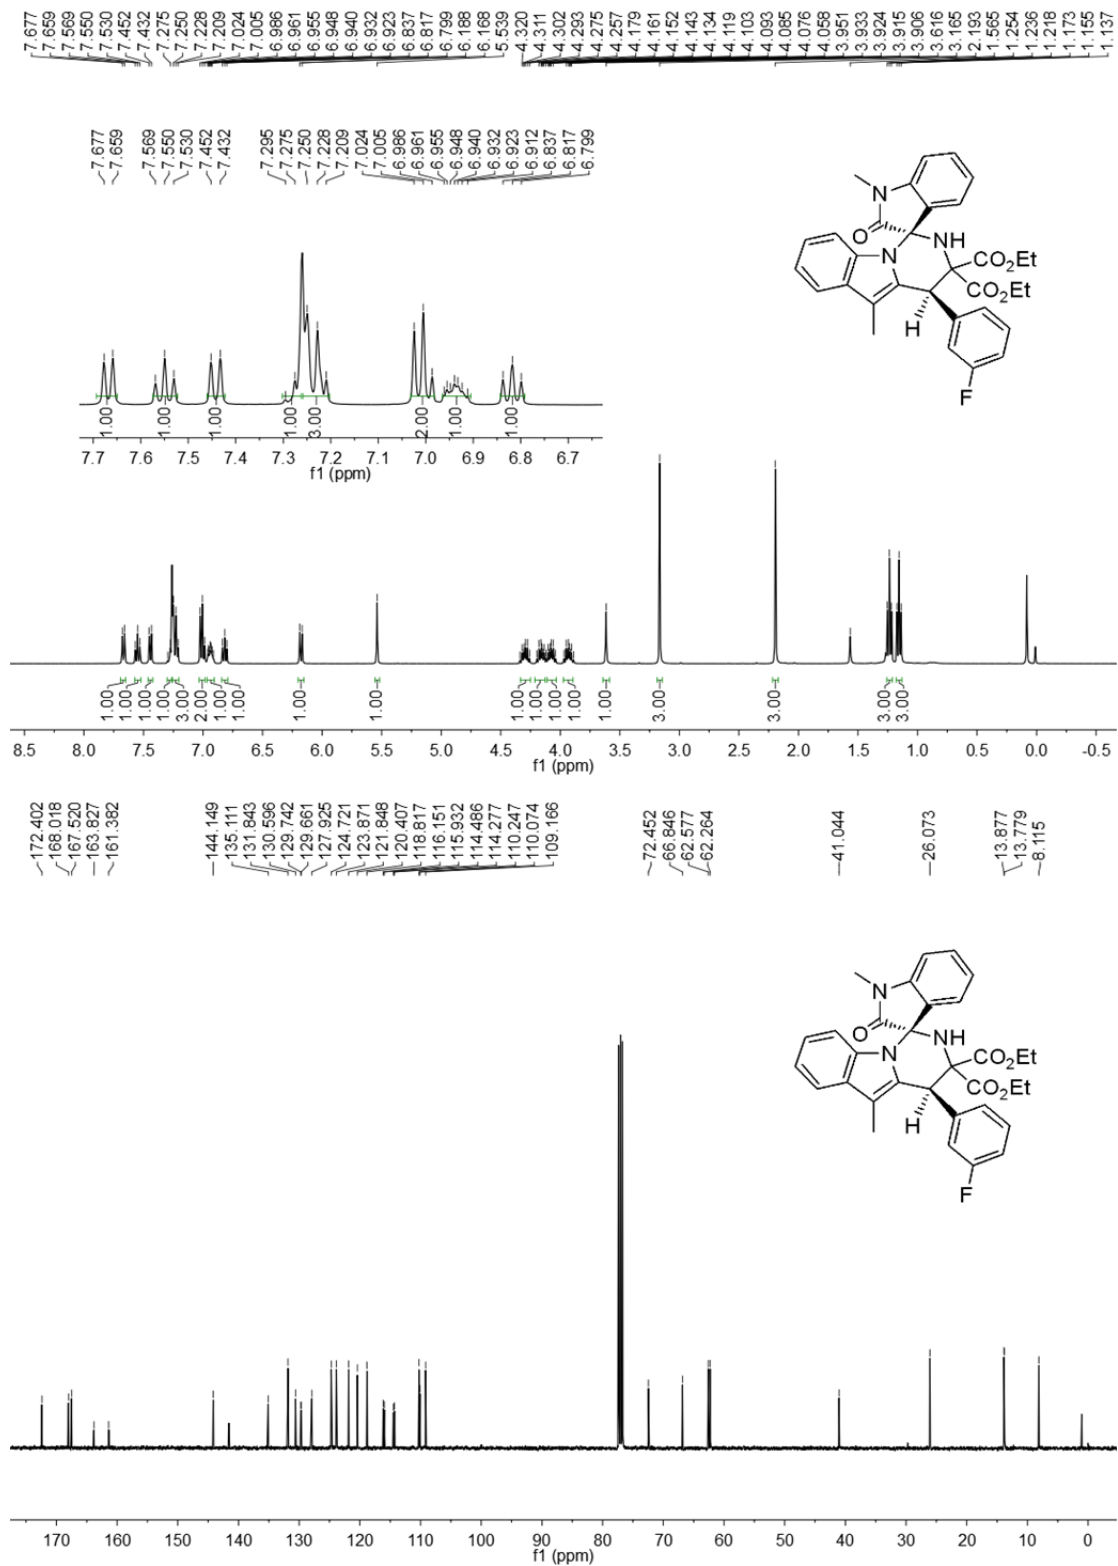

6fa

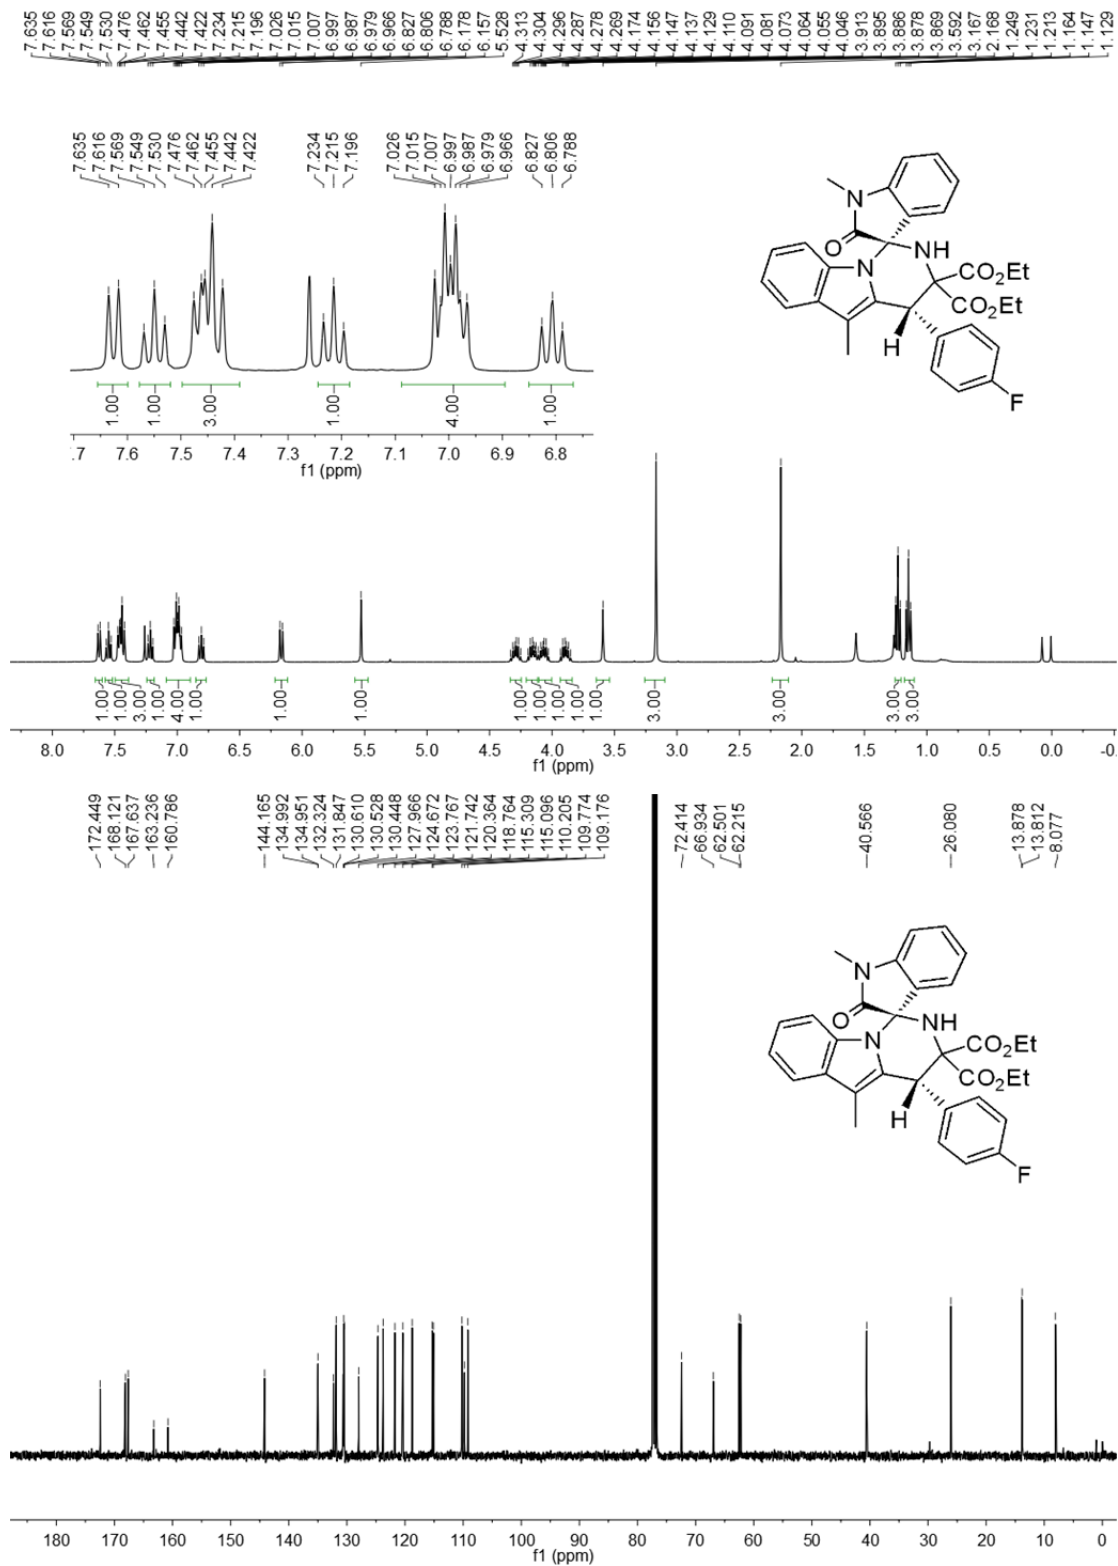

6ga

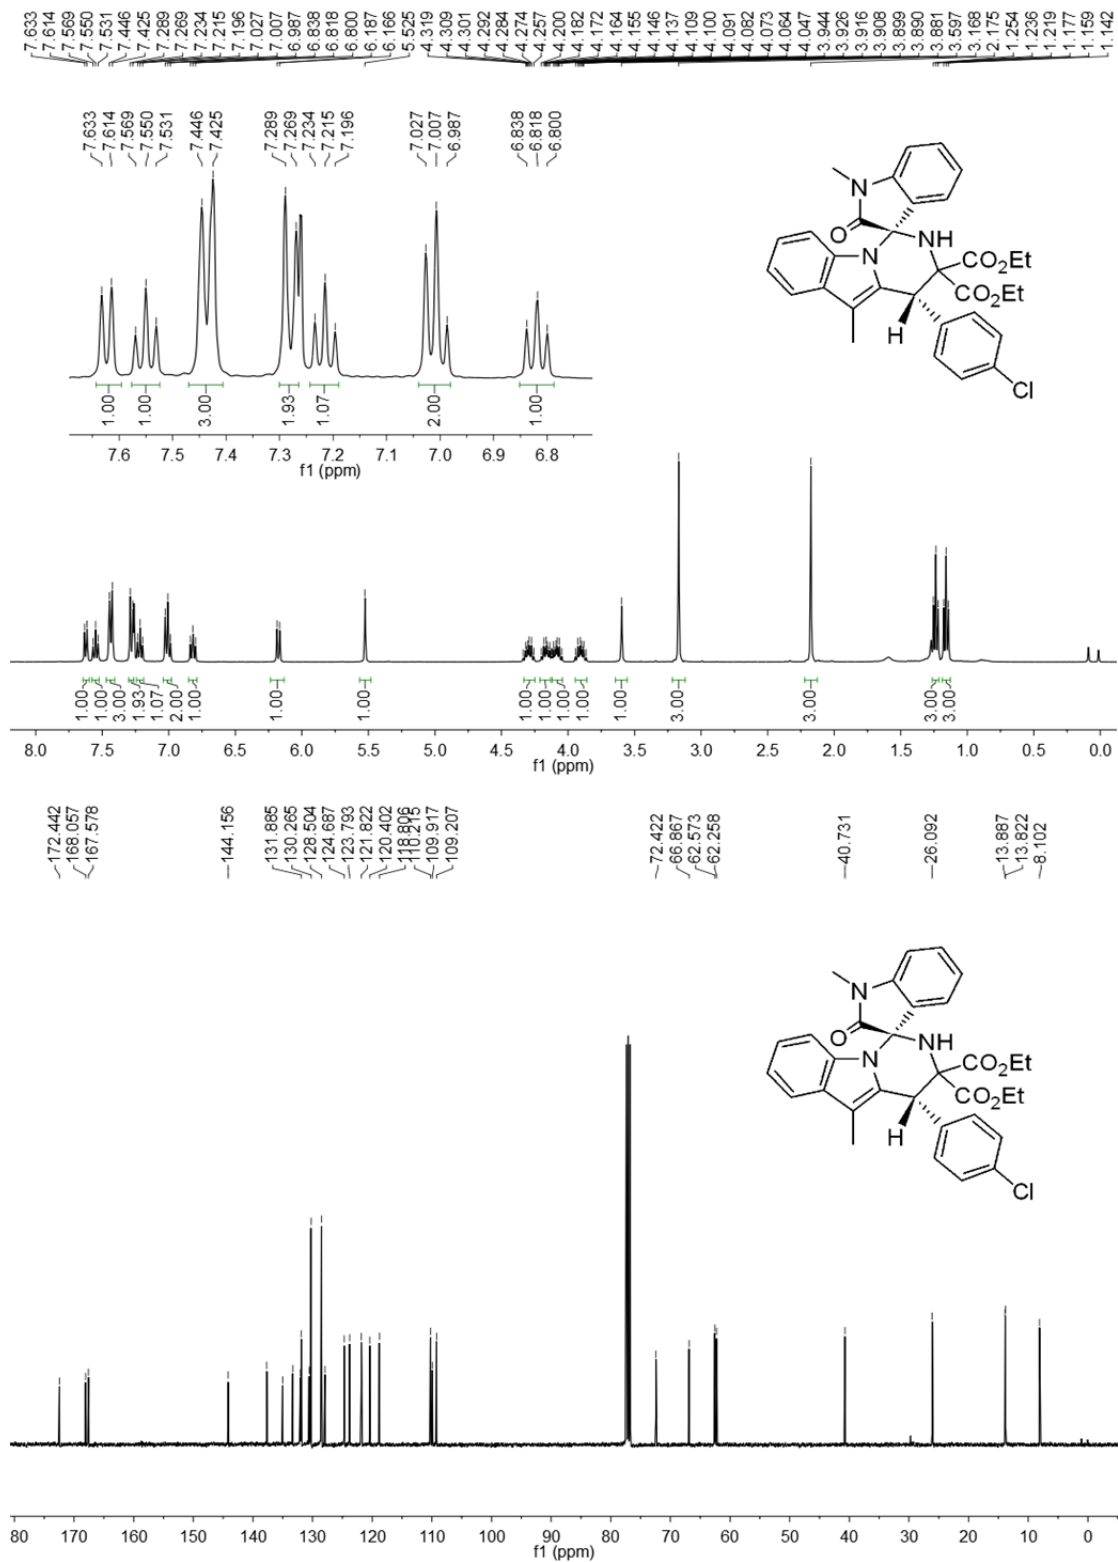

6ha

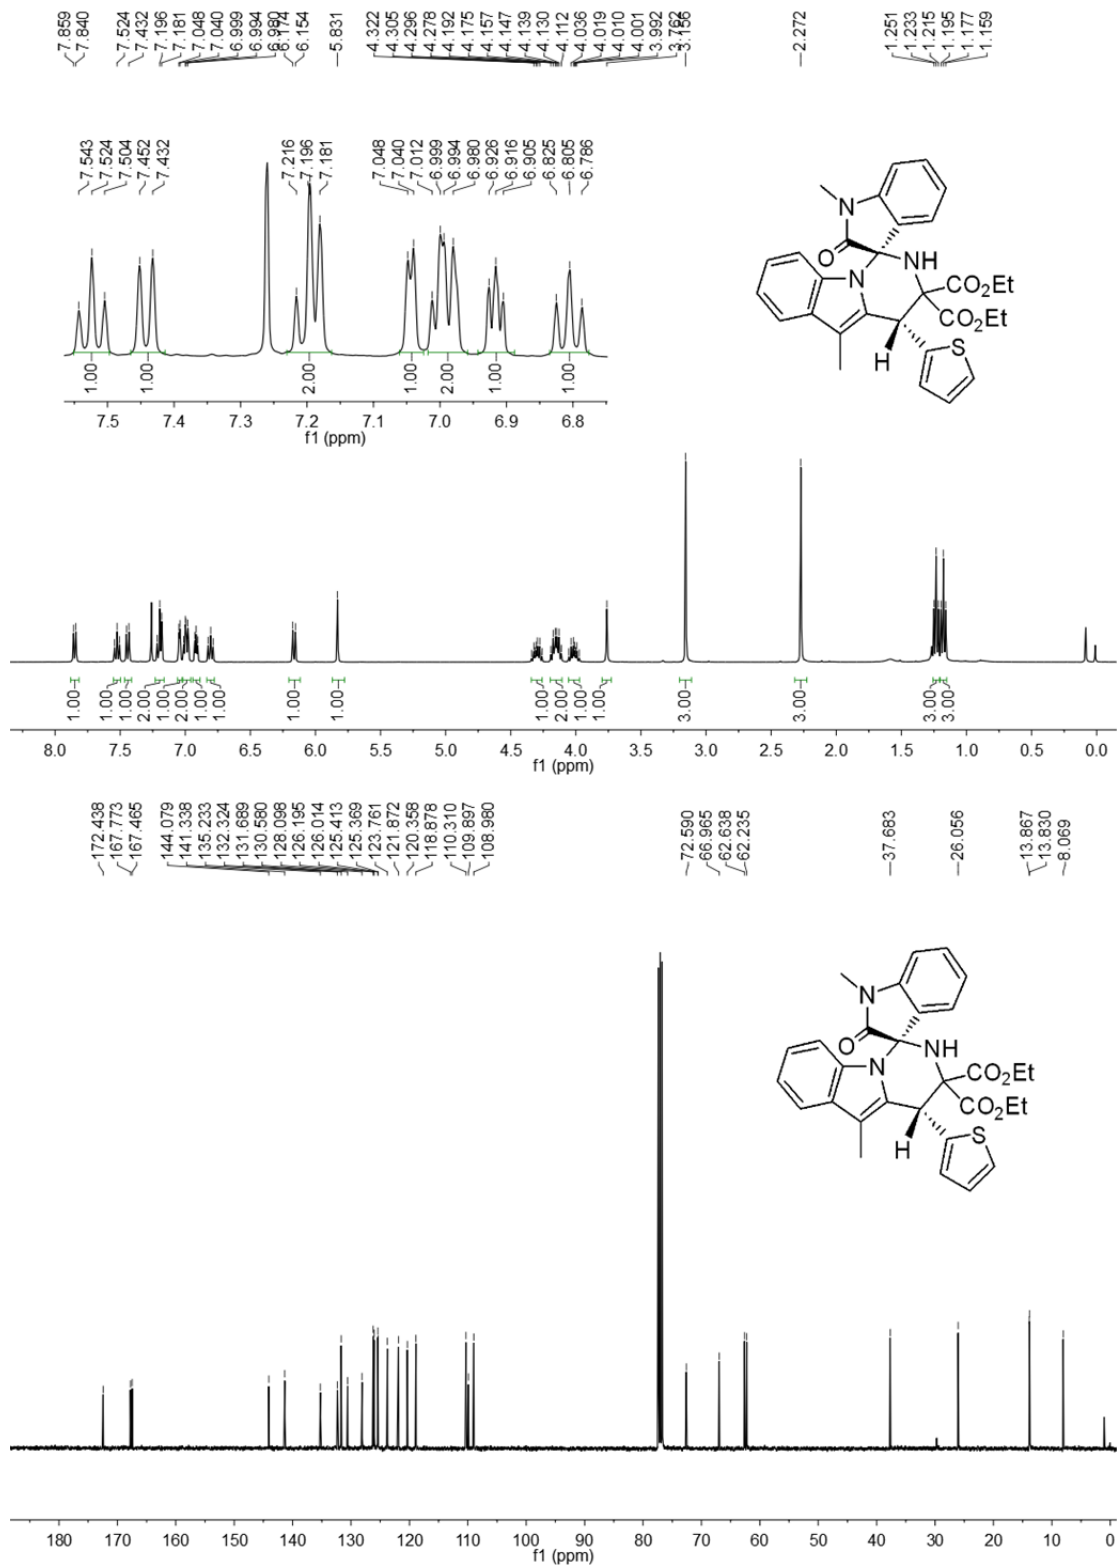

6ia

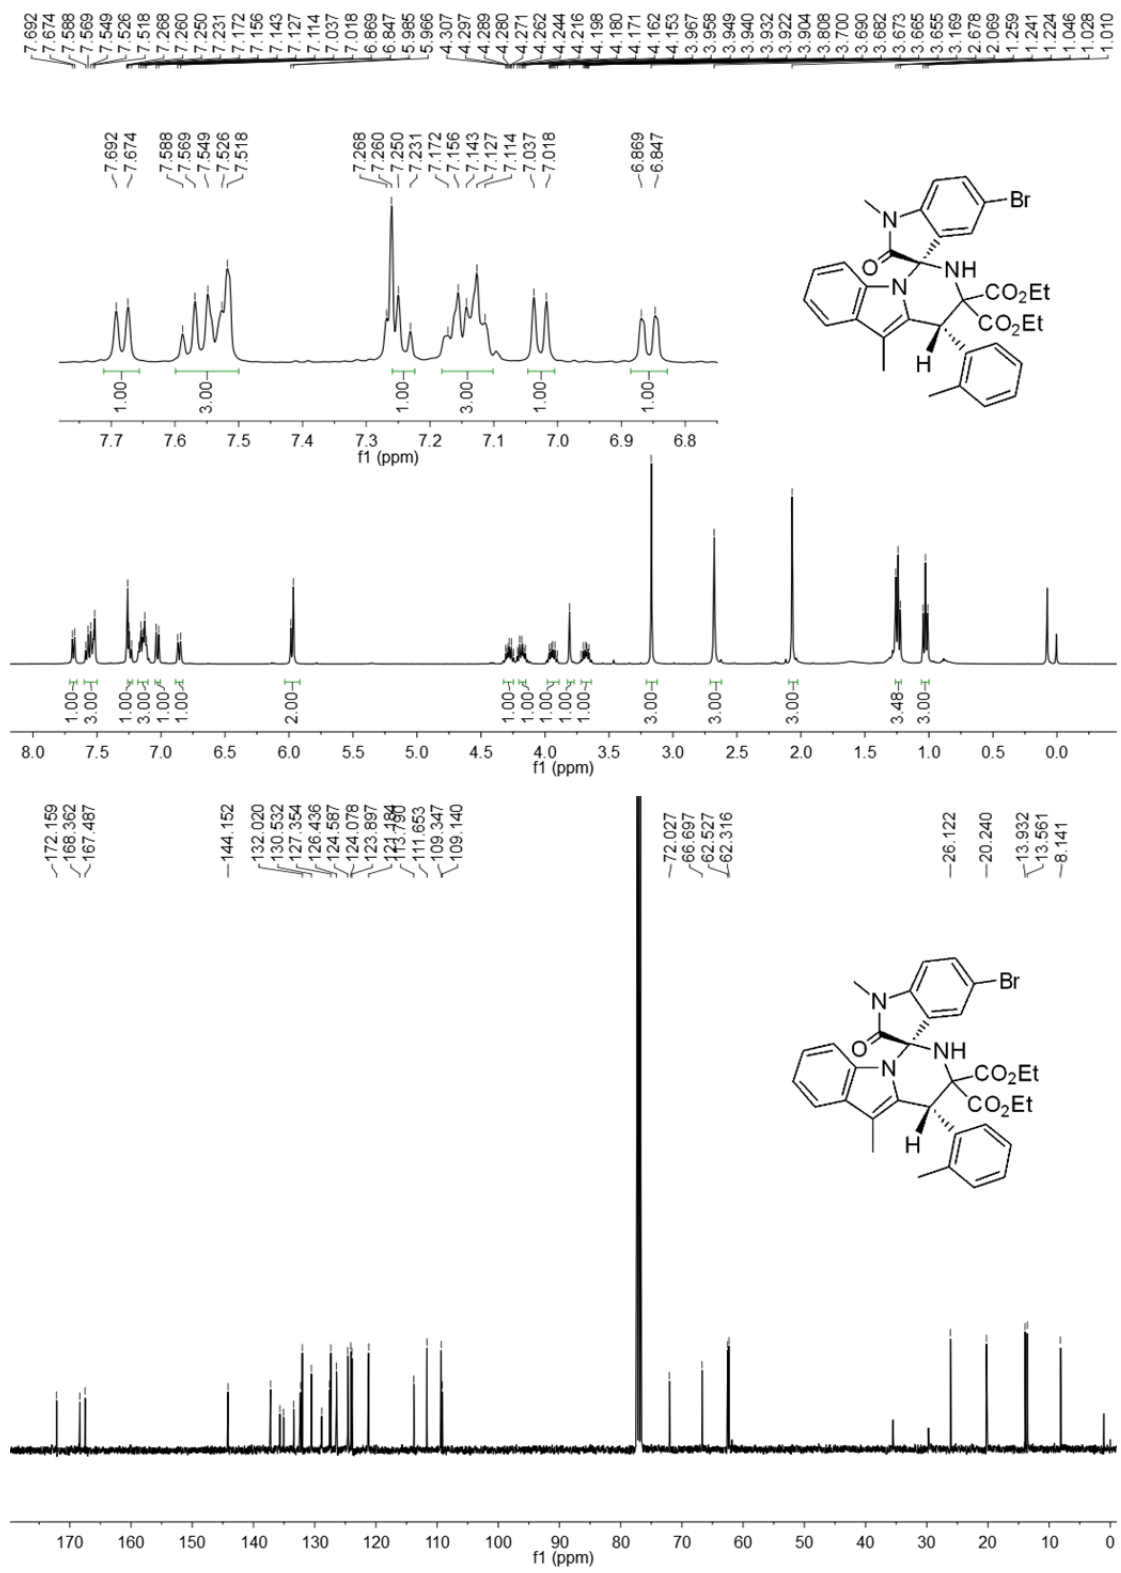

6ja

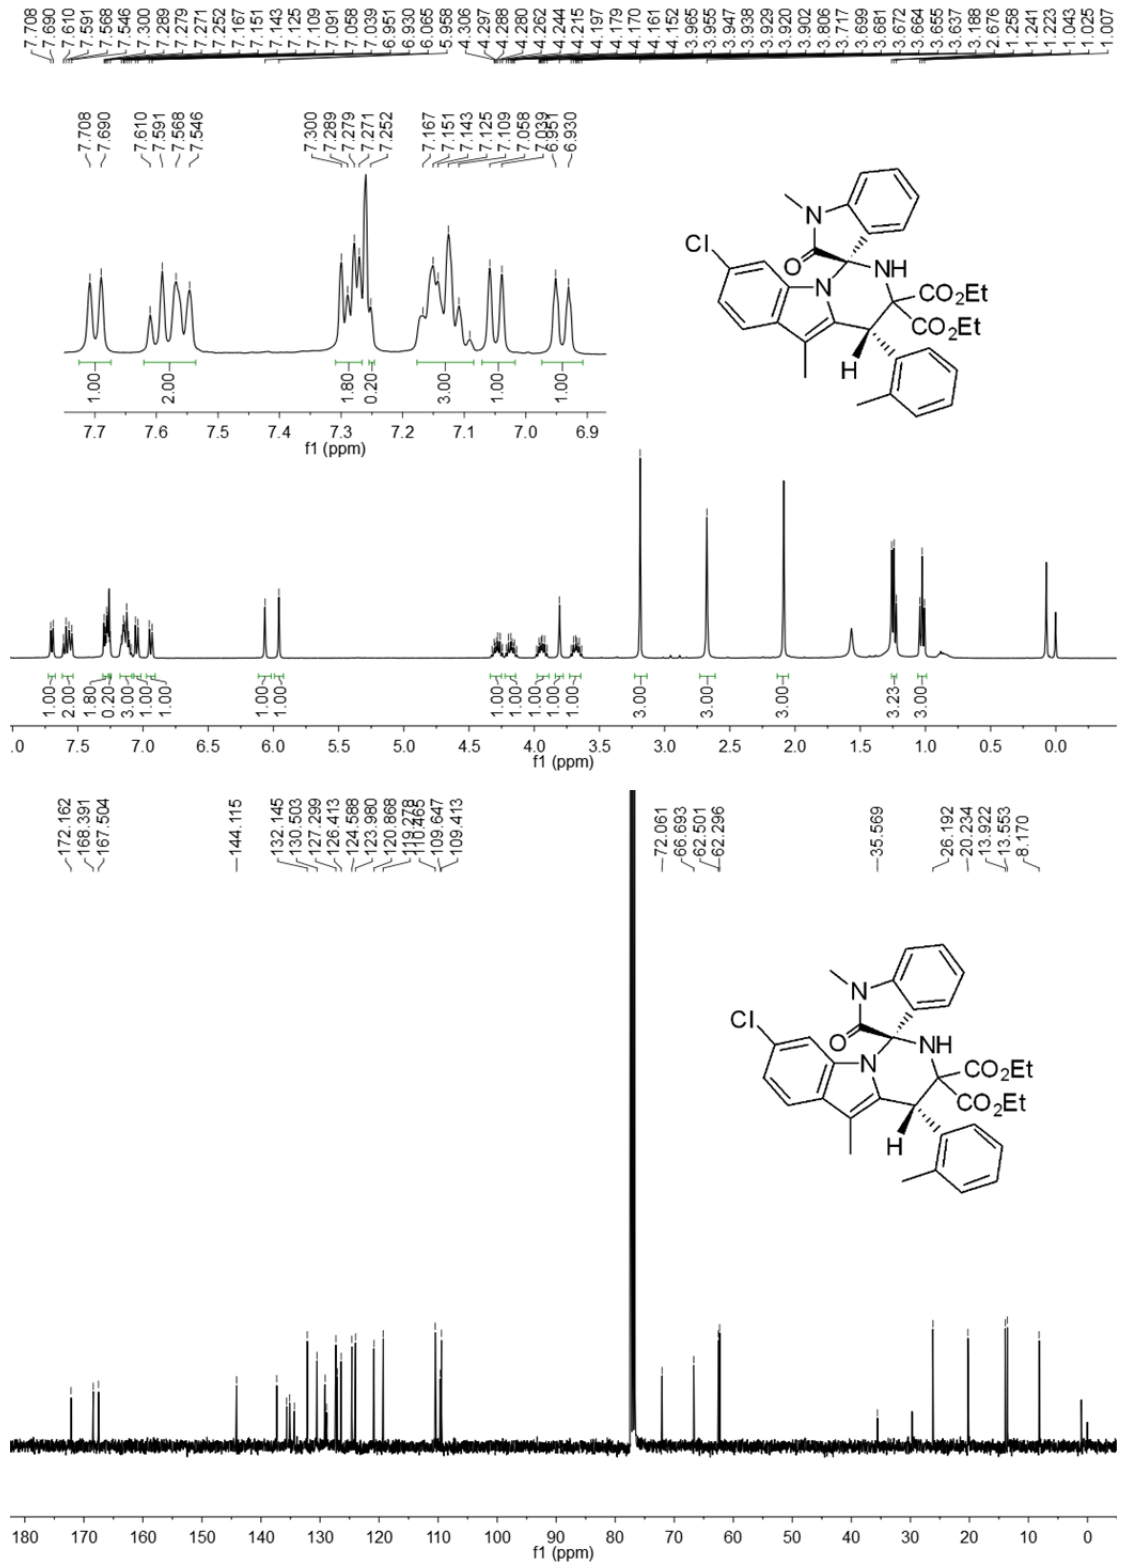



6ka

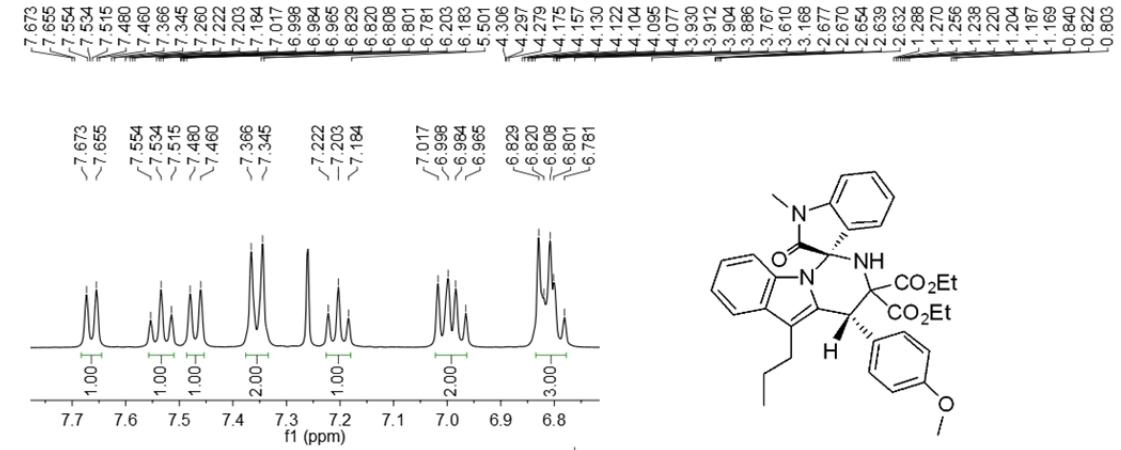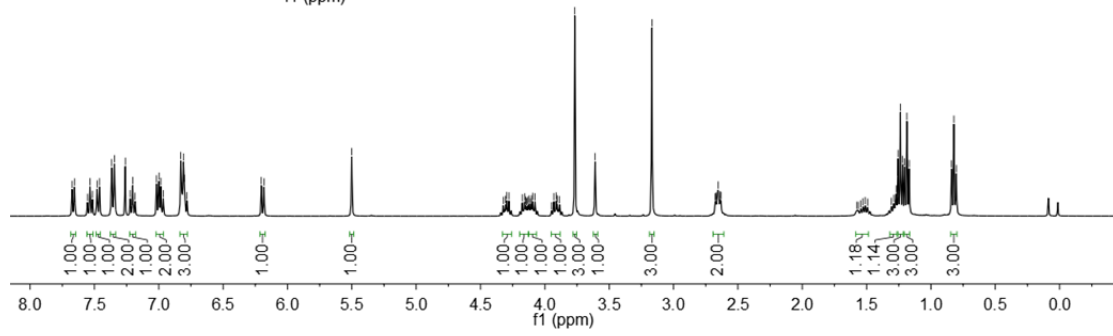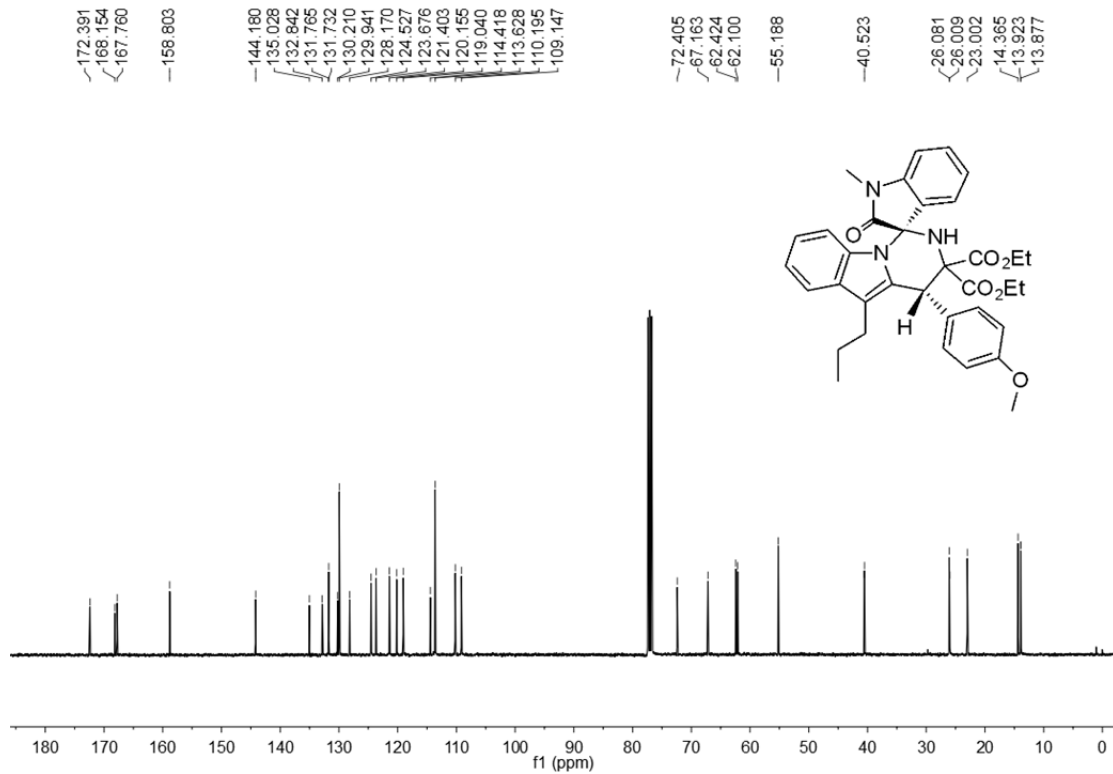

6la

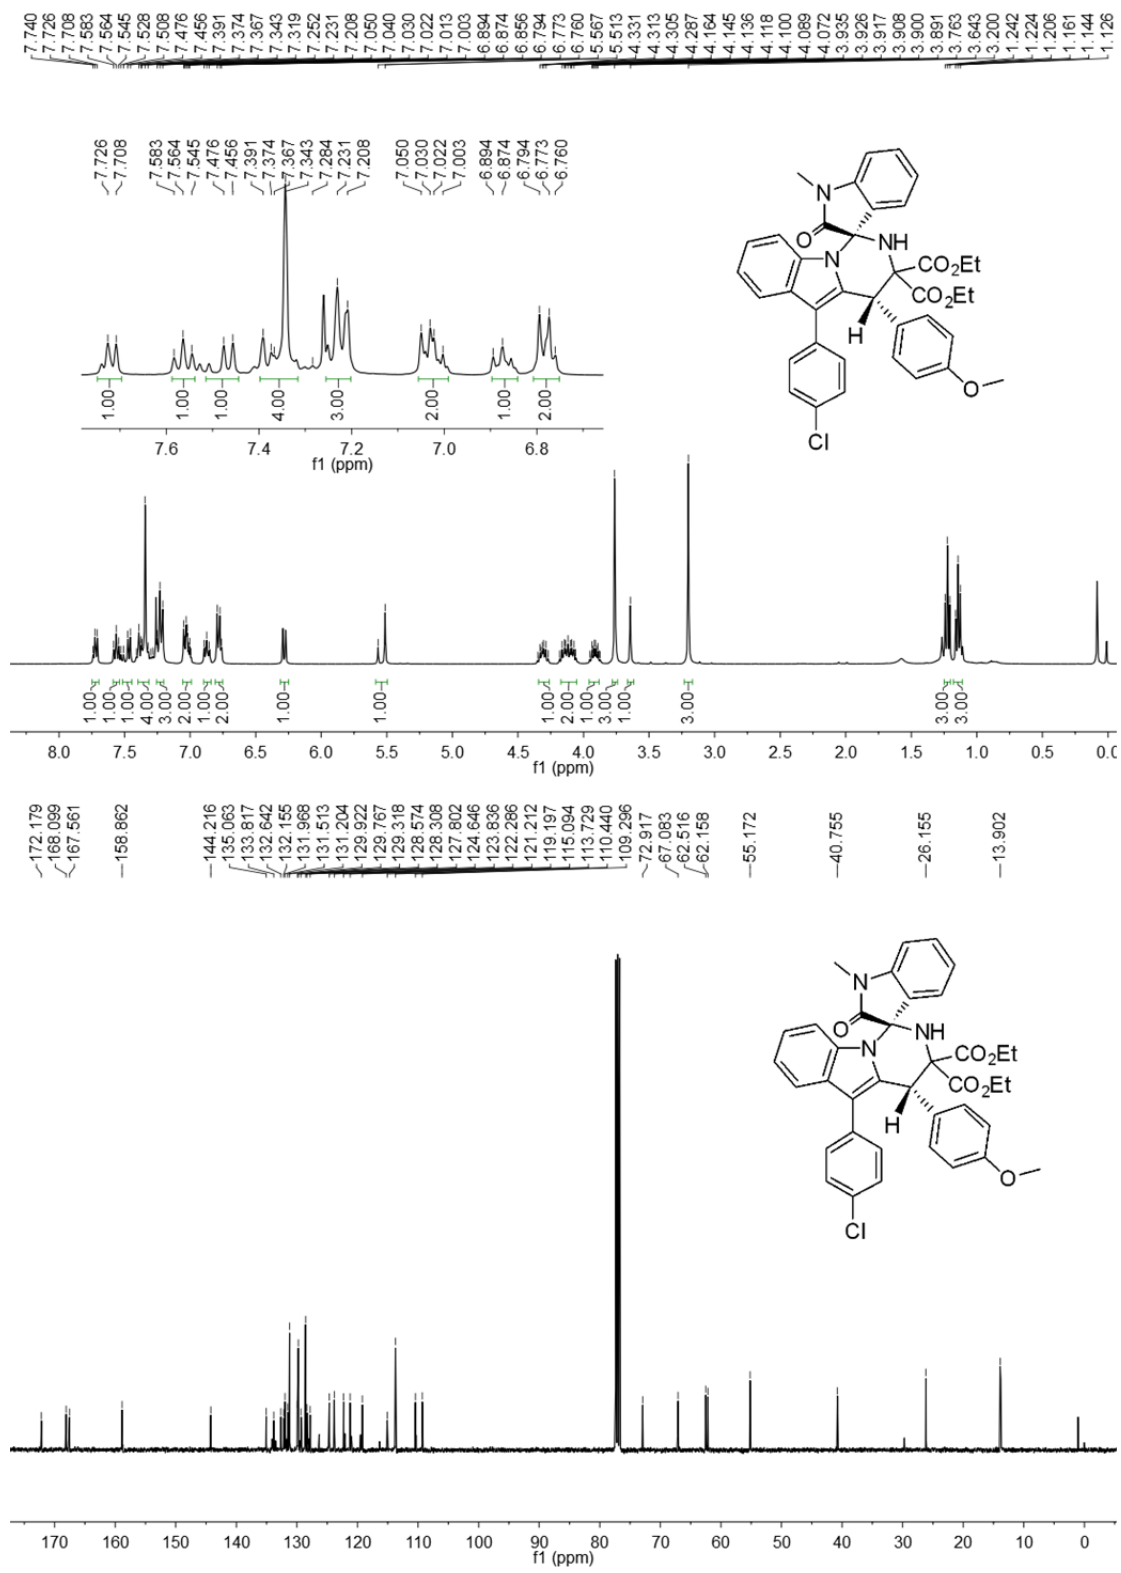

6ab

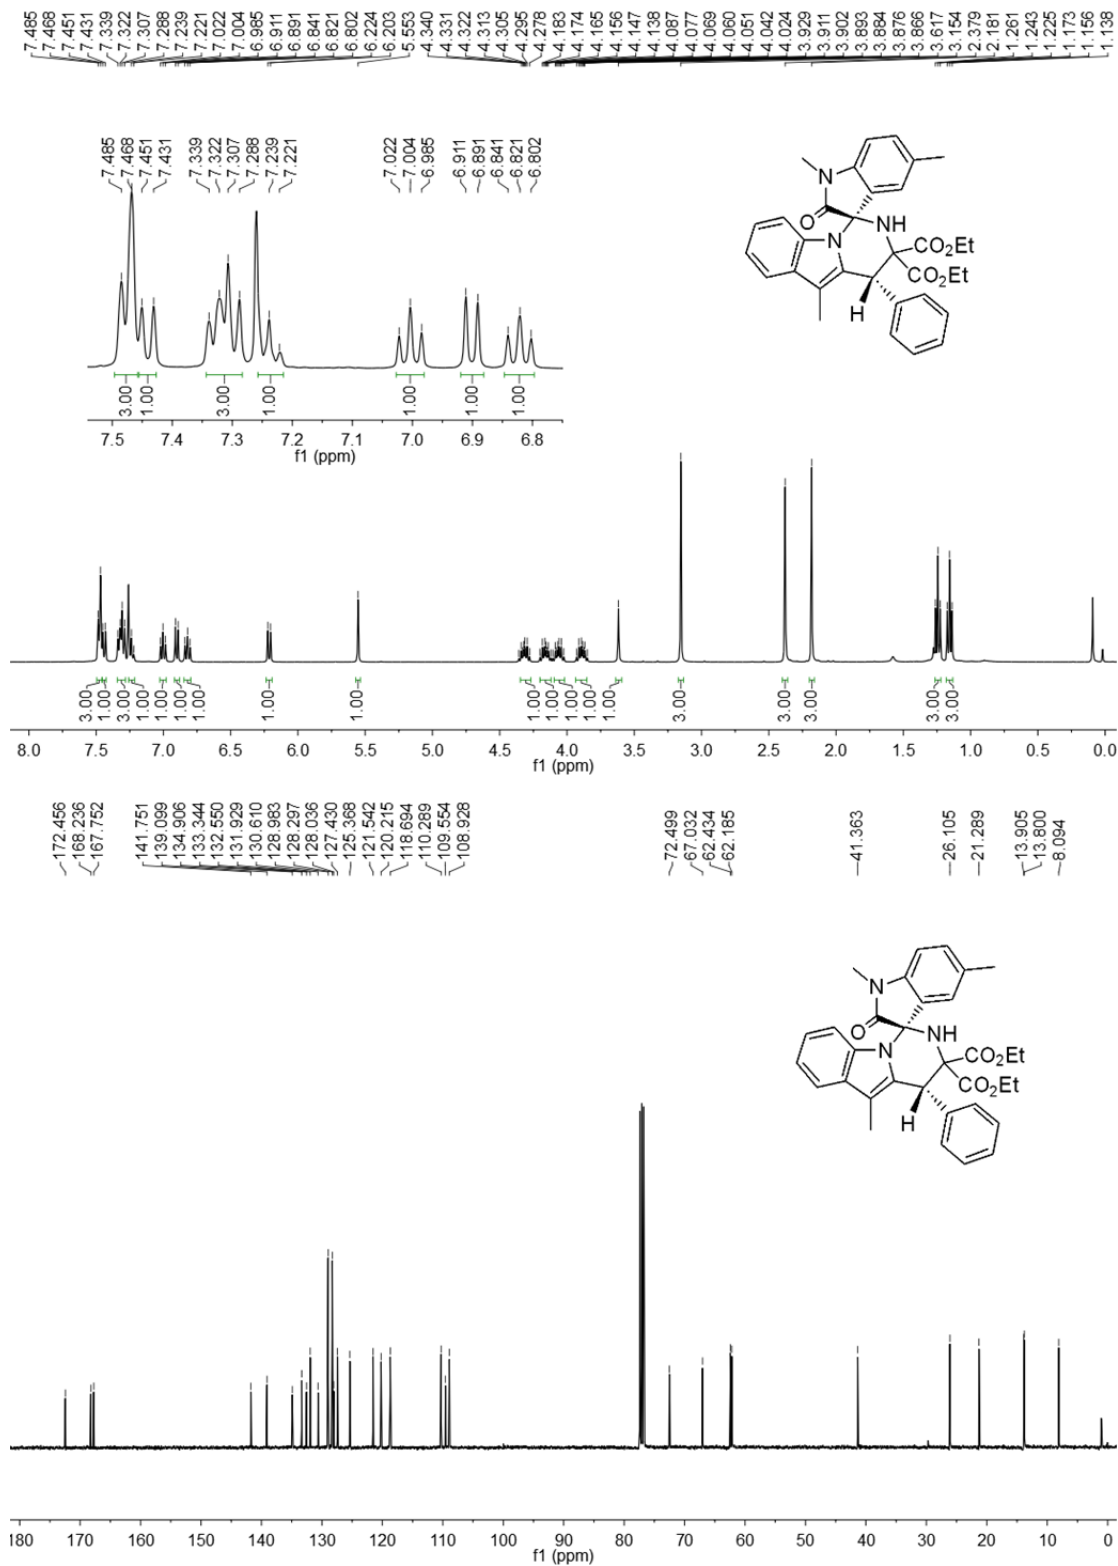

6ac

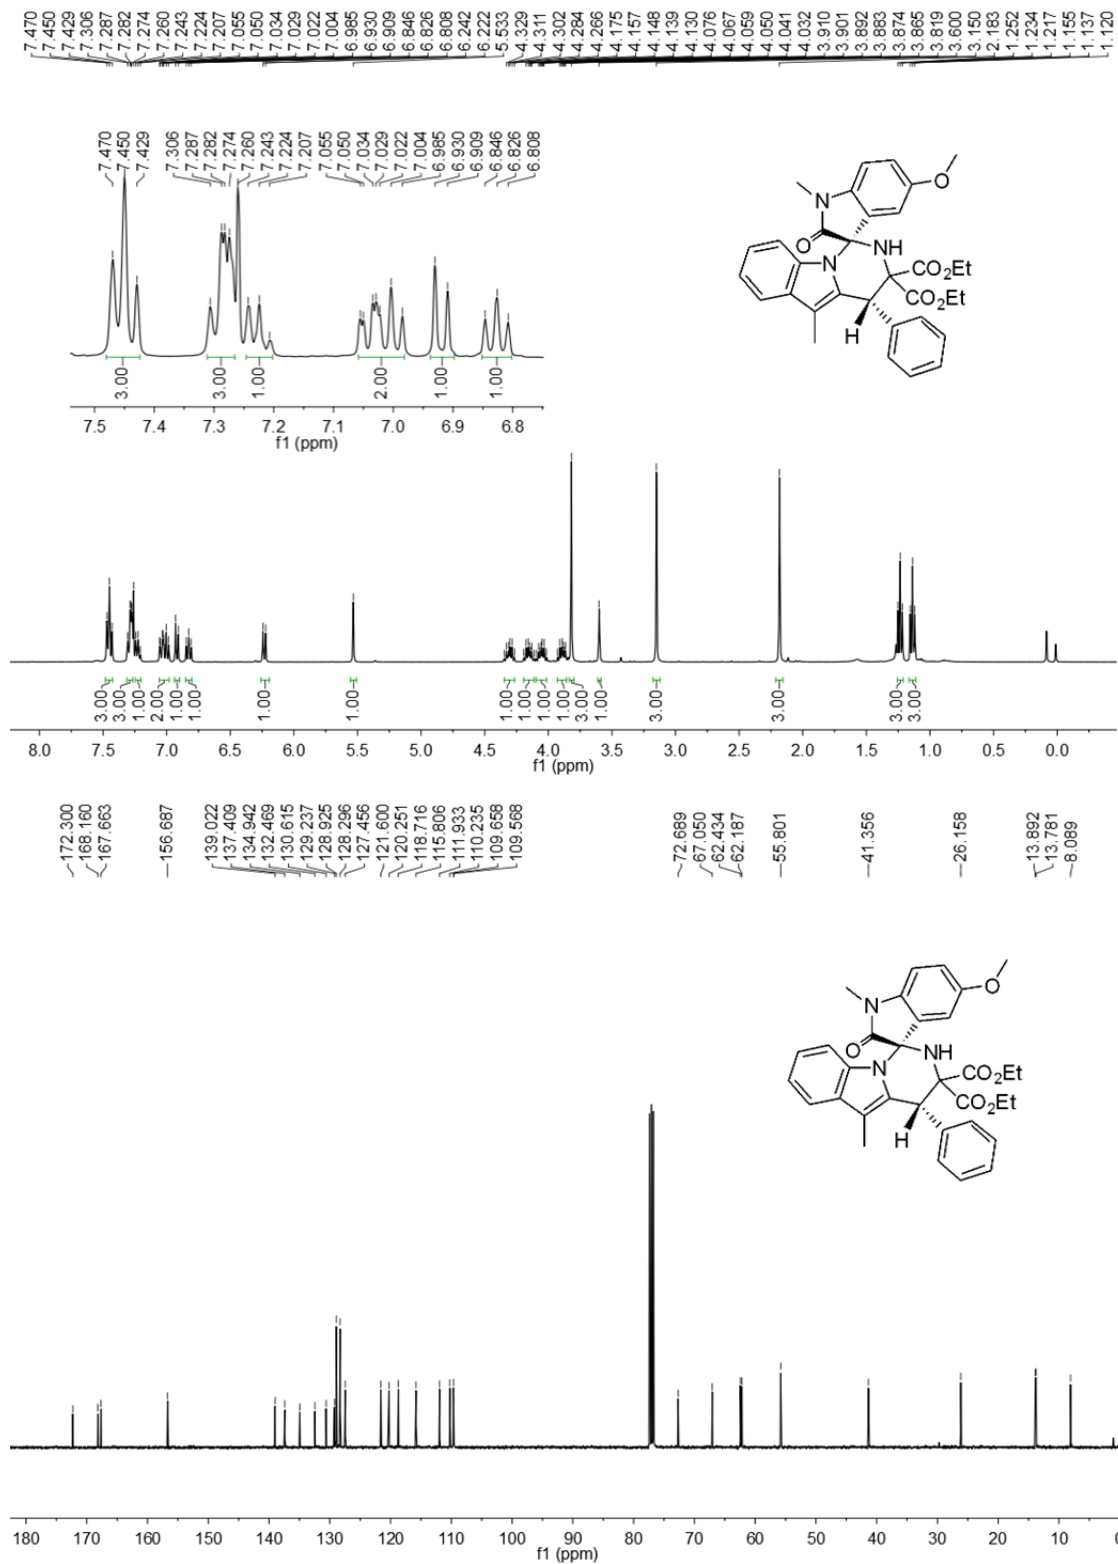

6ad

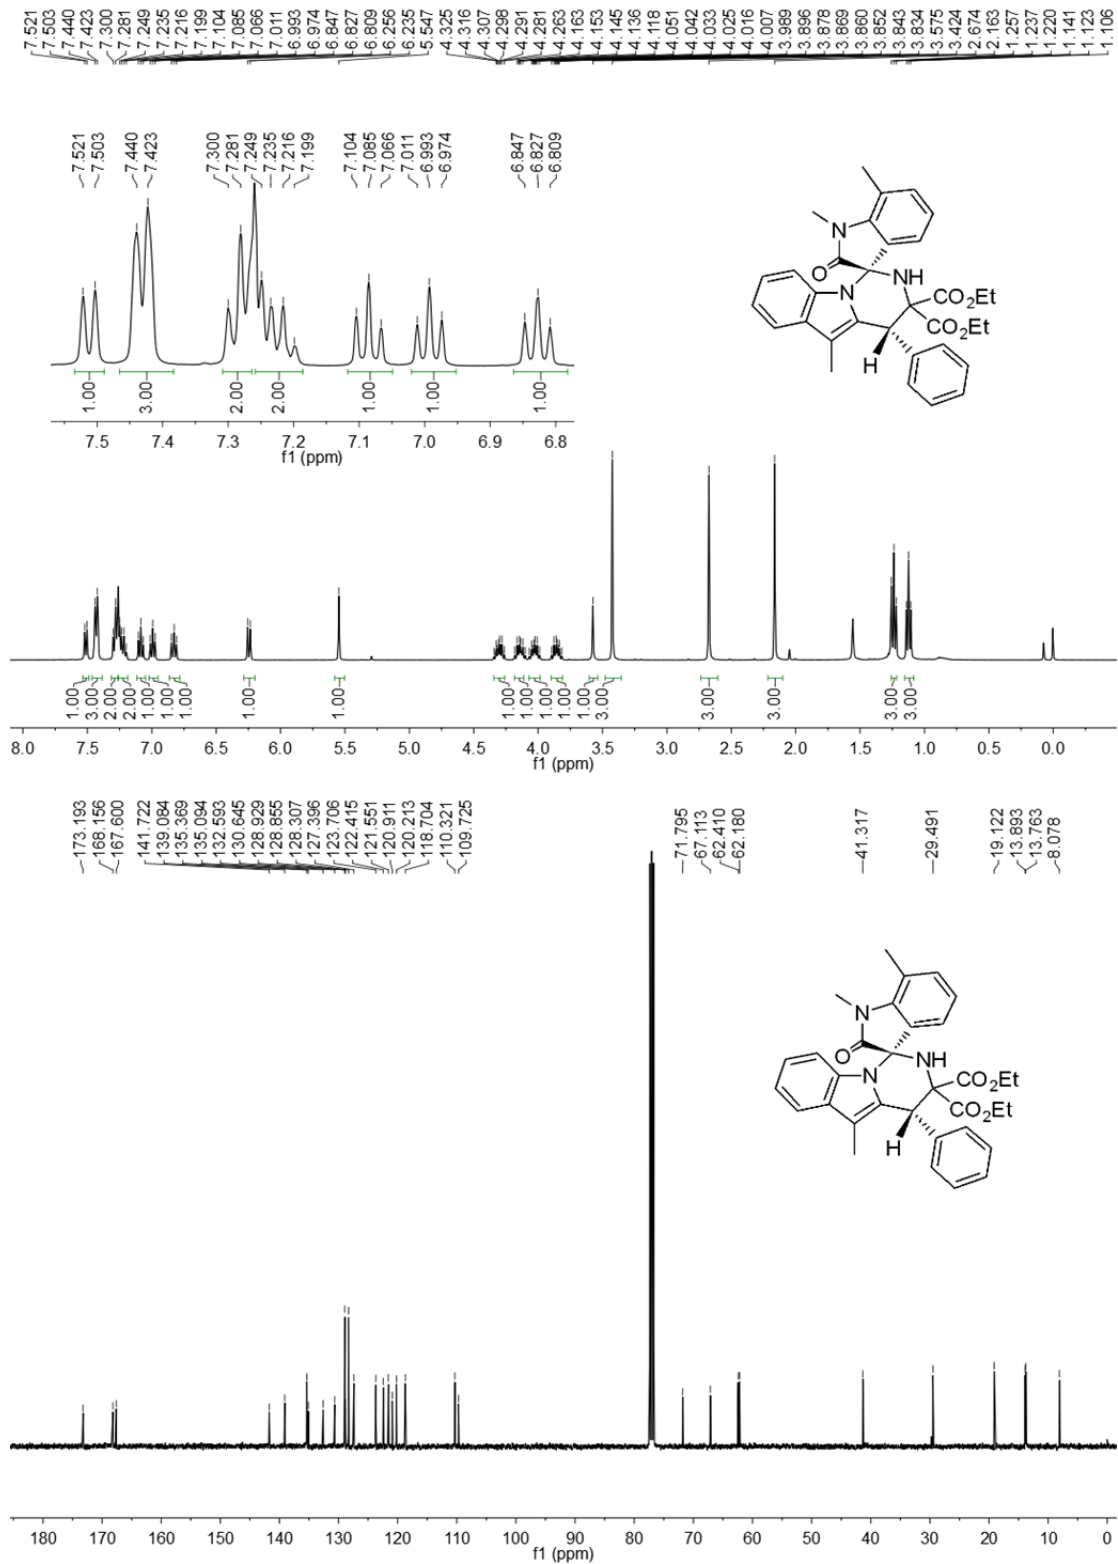

6ae

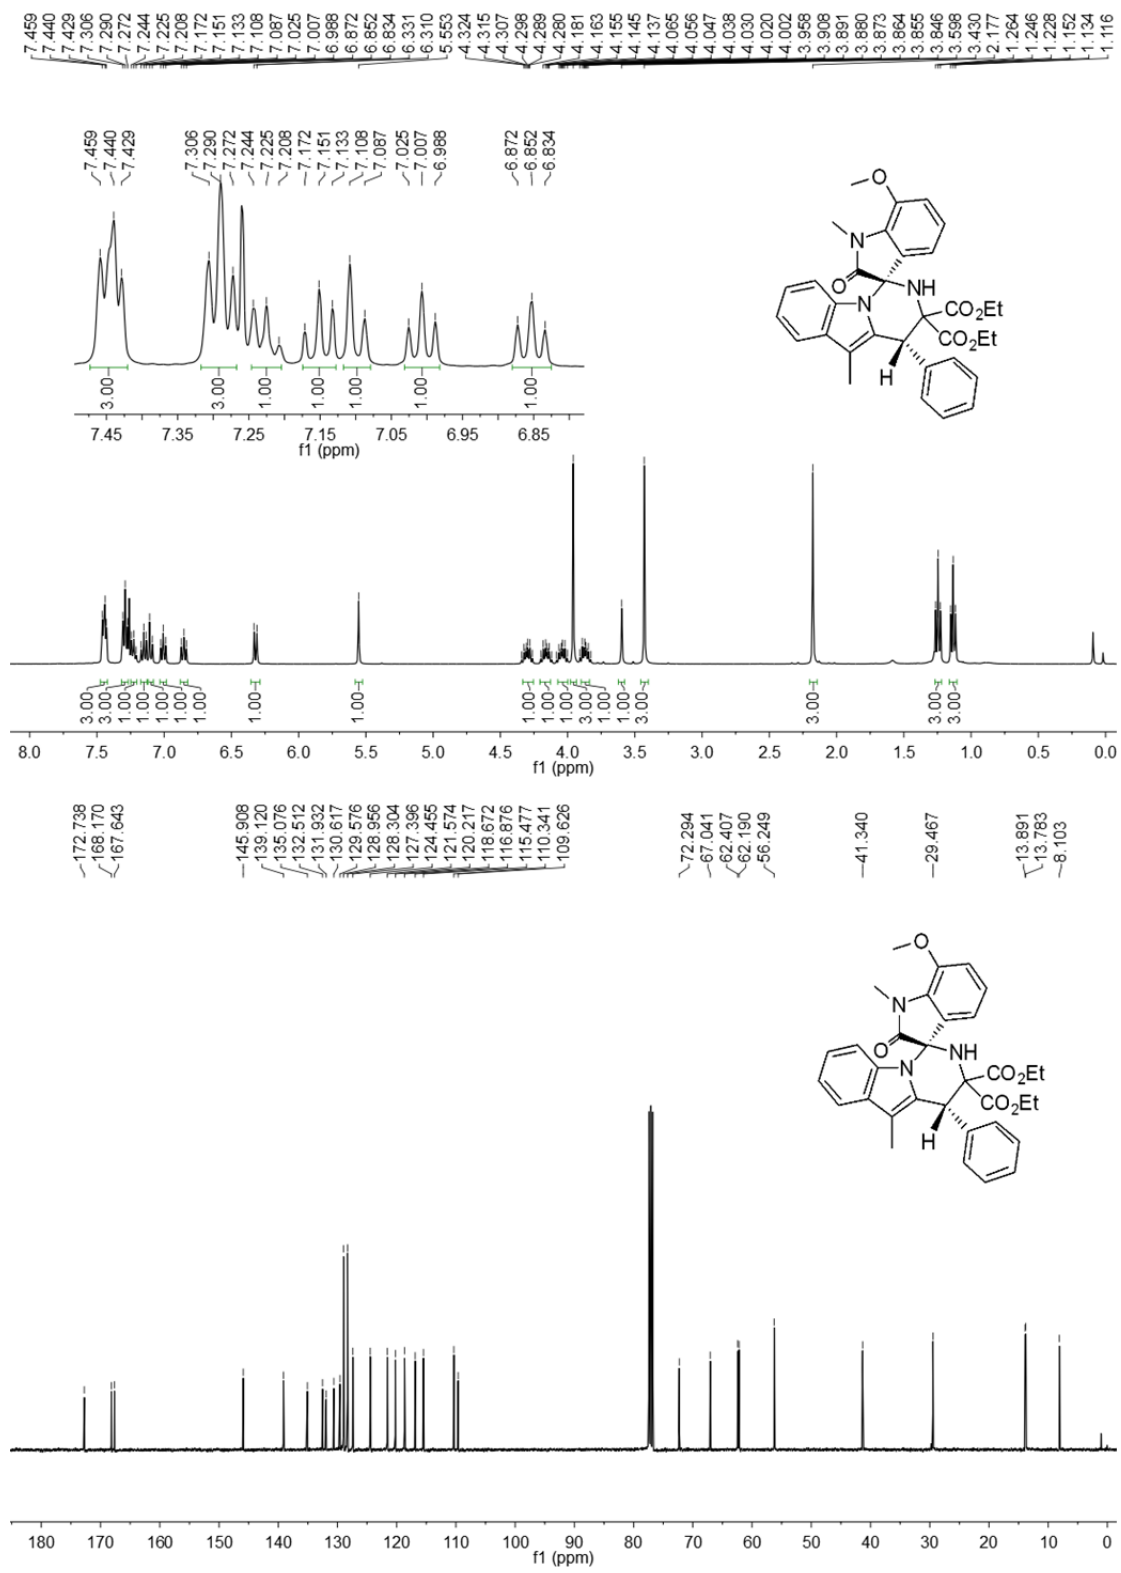

6af

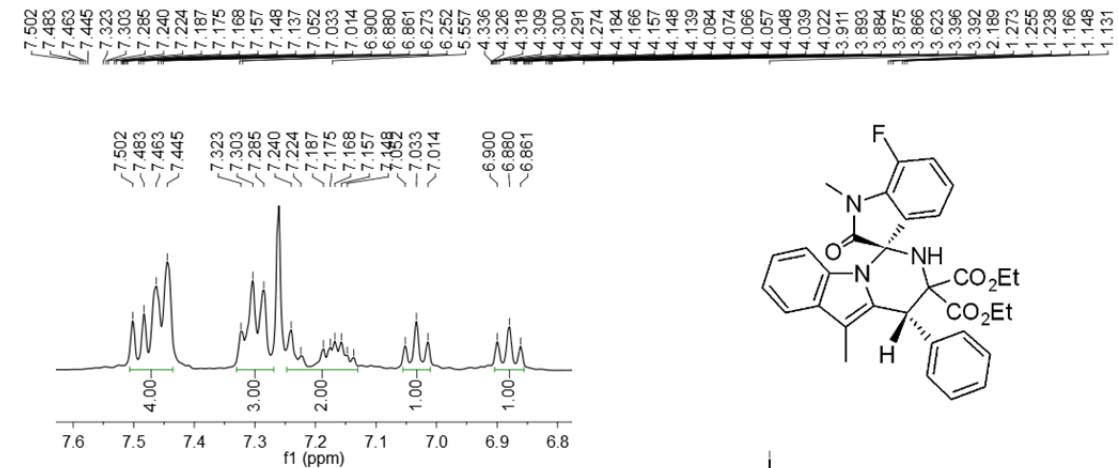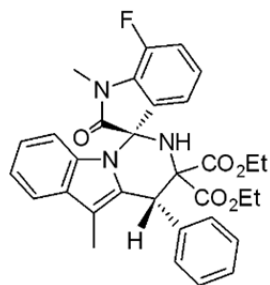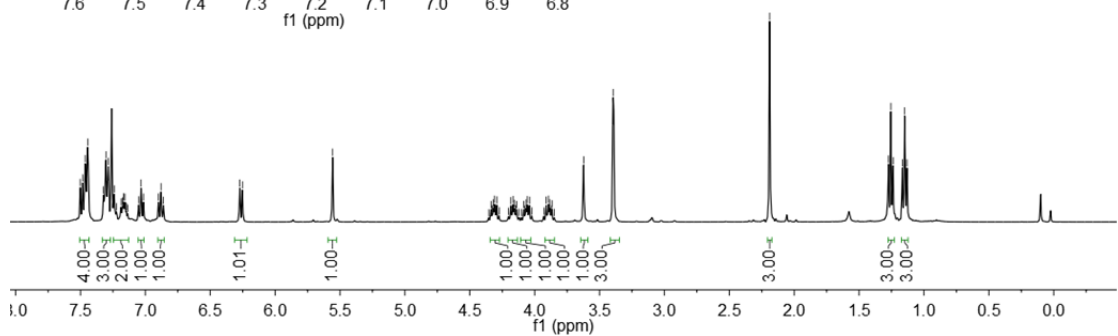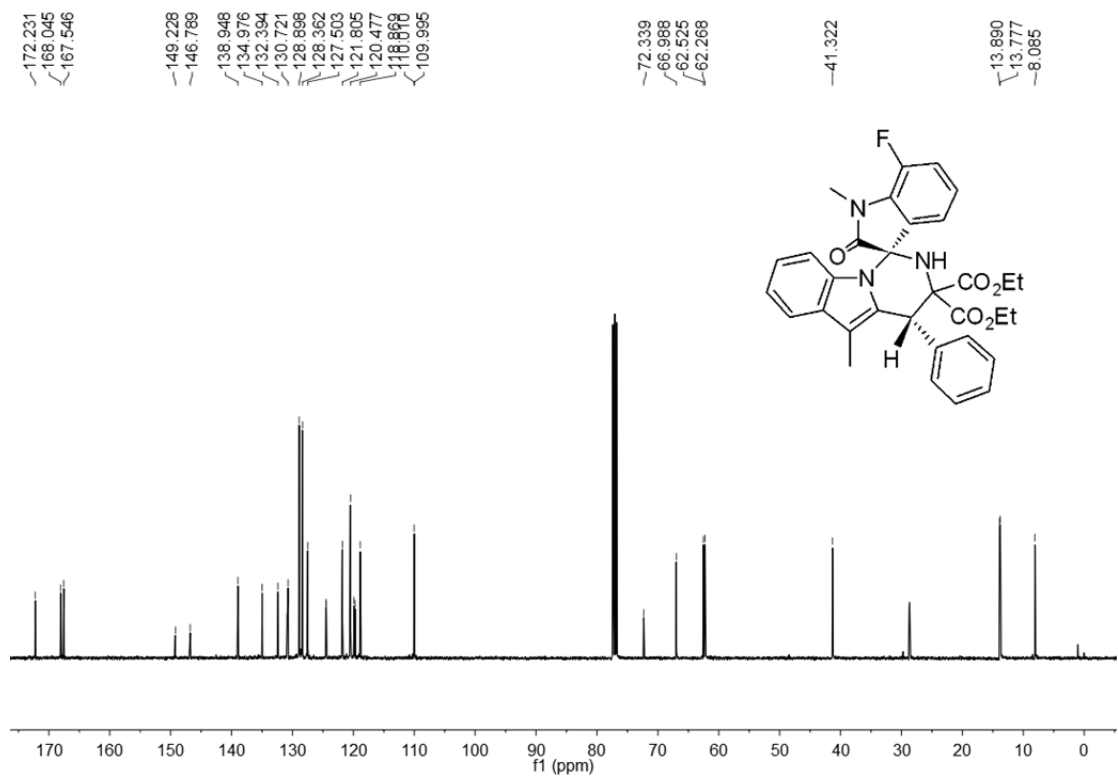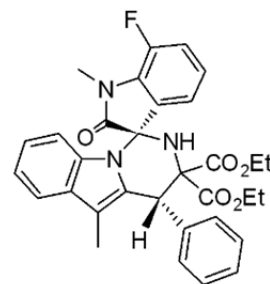

6mb

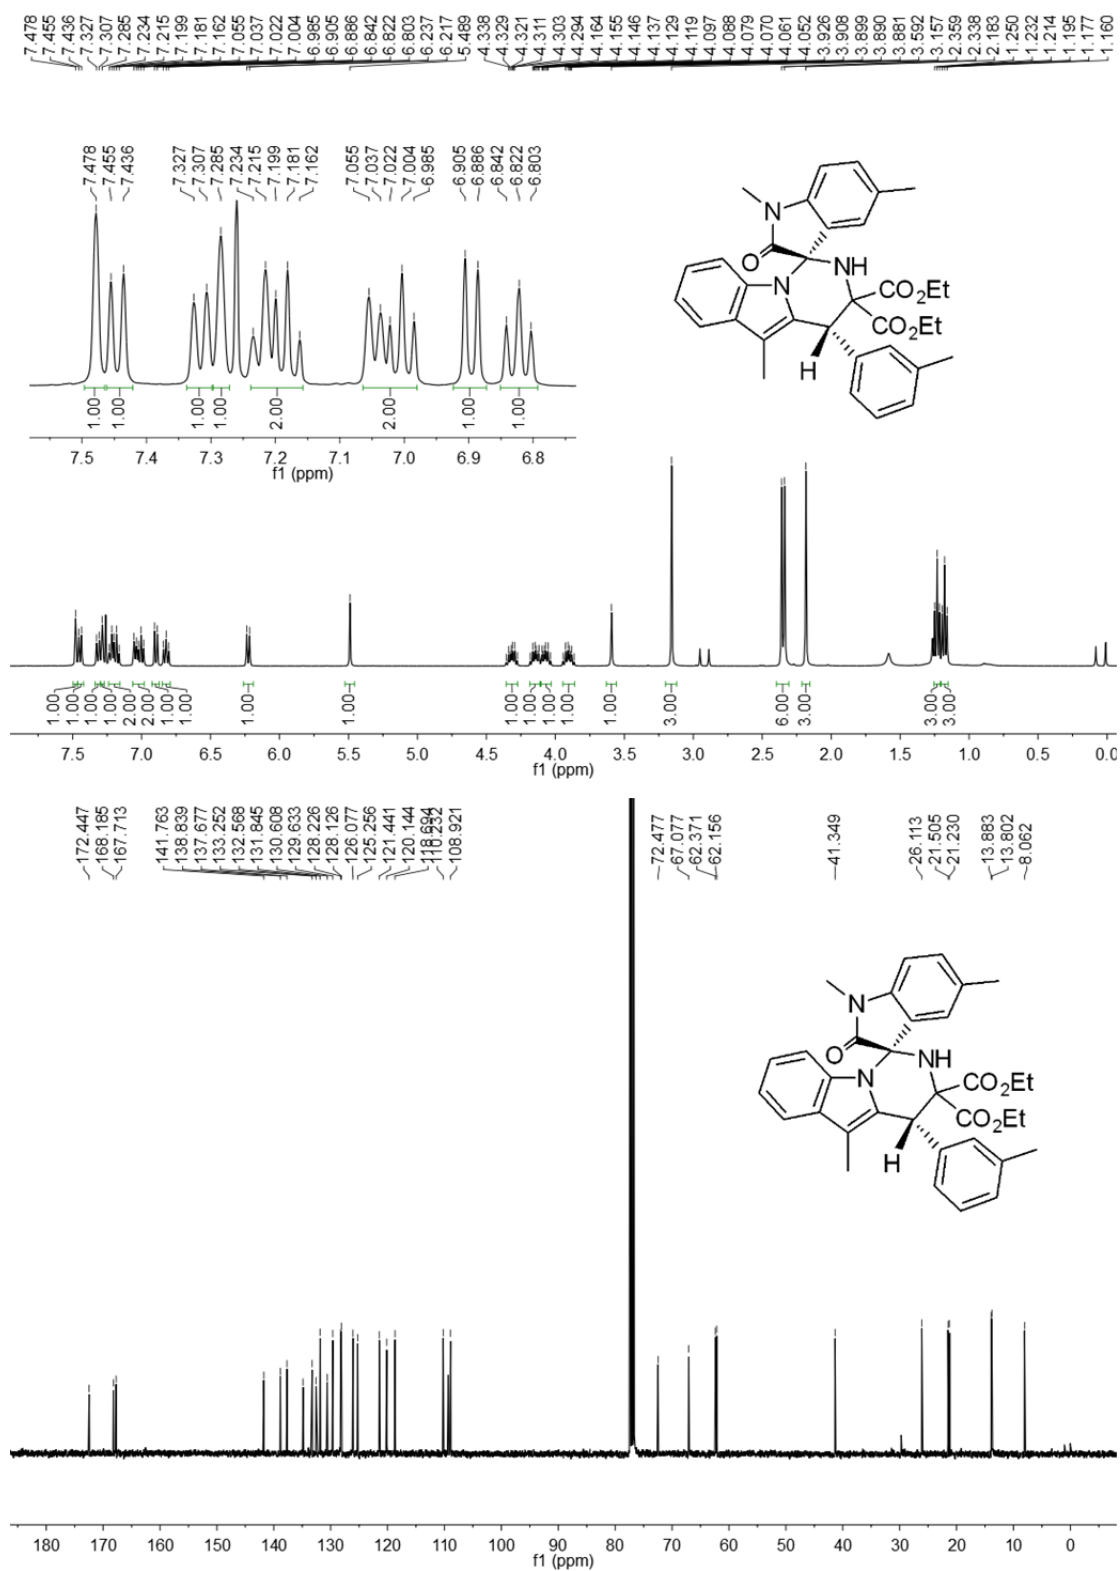



## 5. HPLC spectra of products 6

6aa

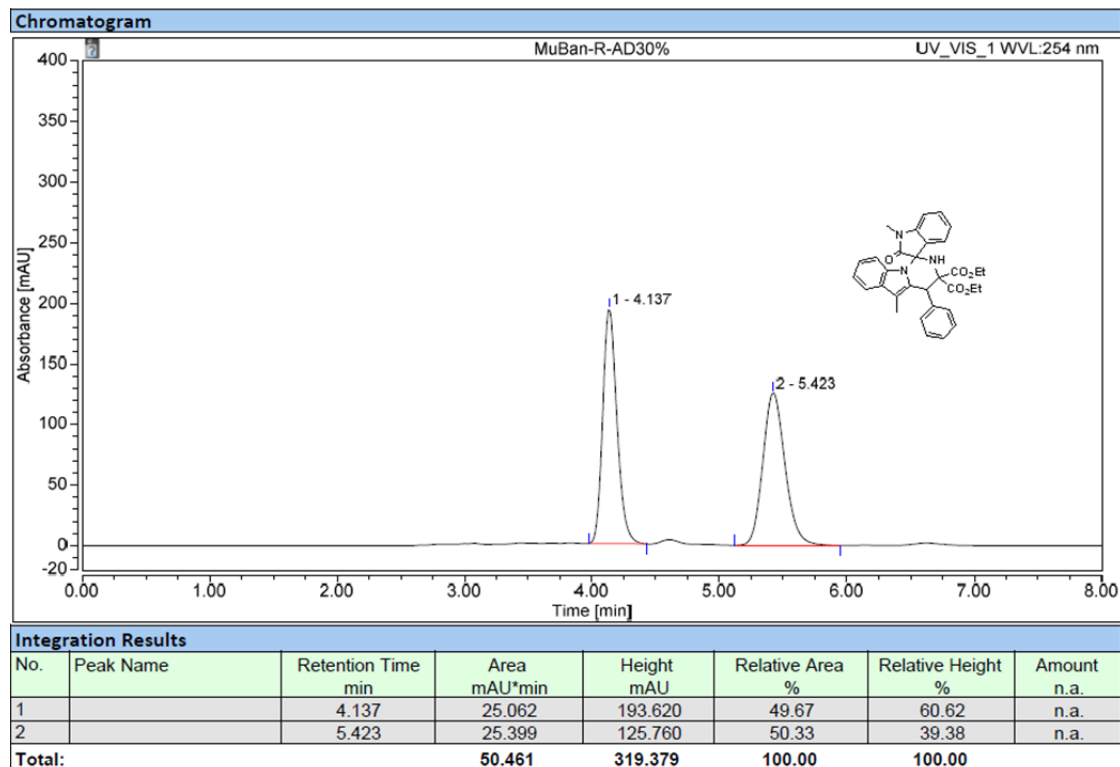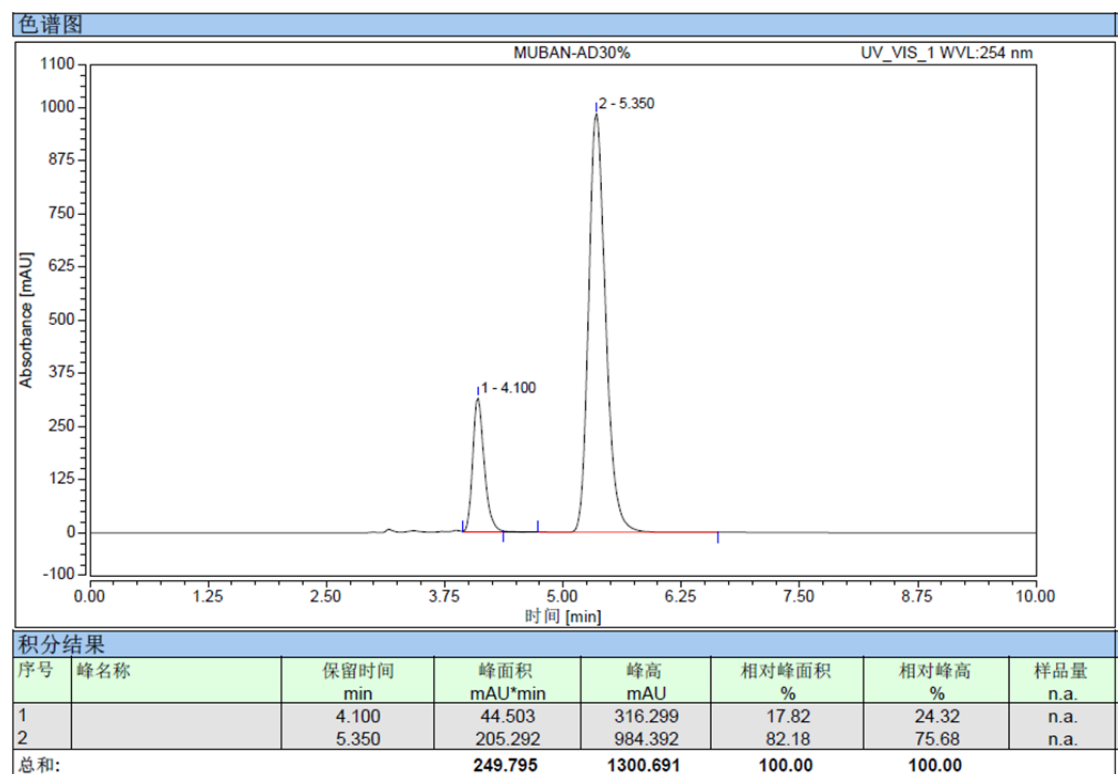

**ent-6ba**

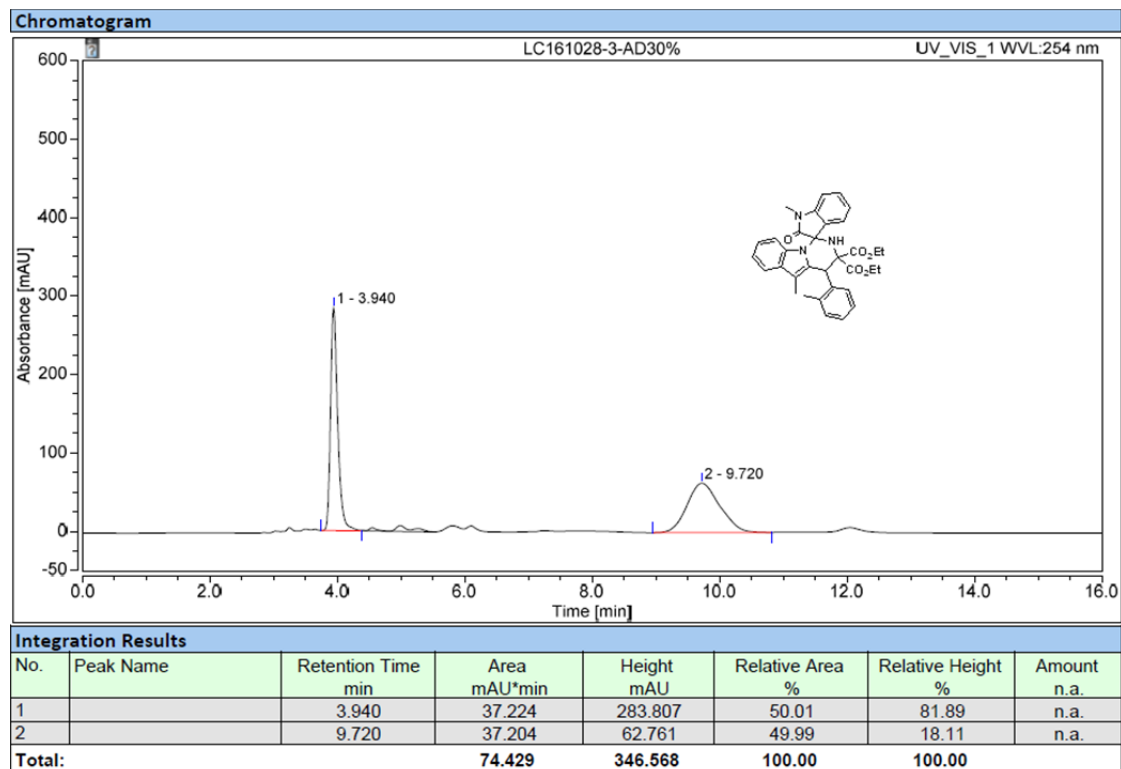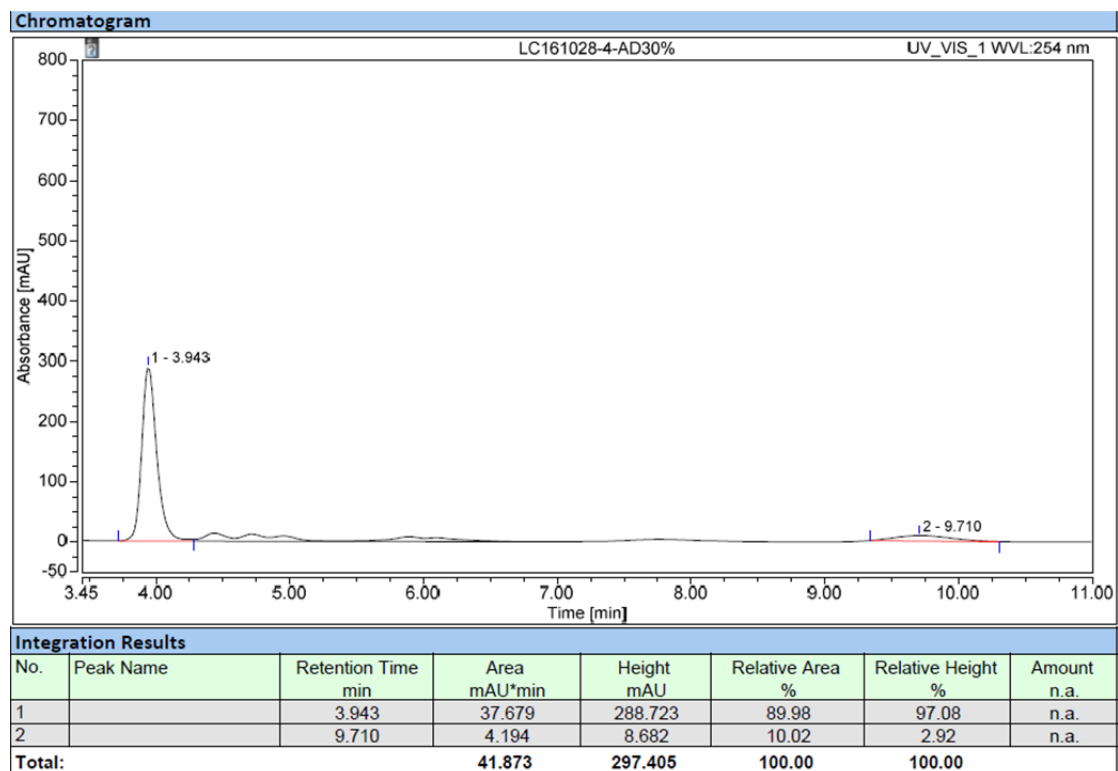

## 6ca

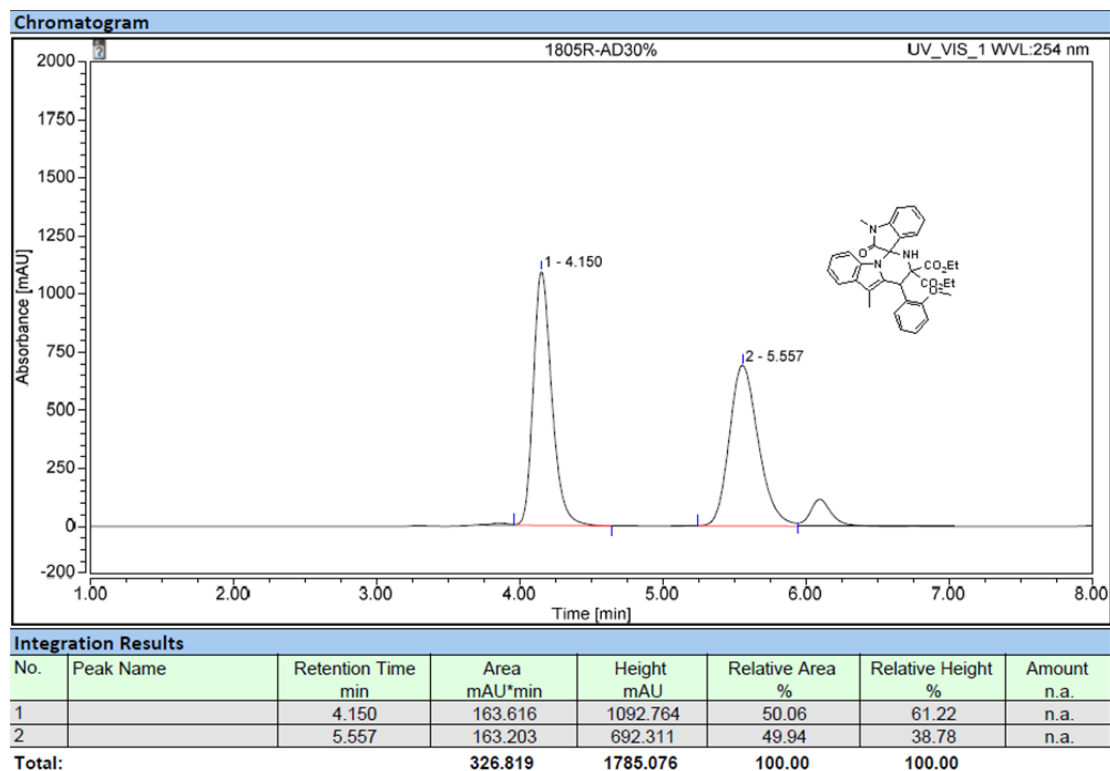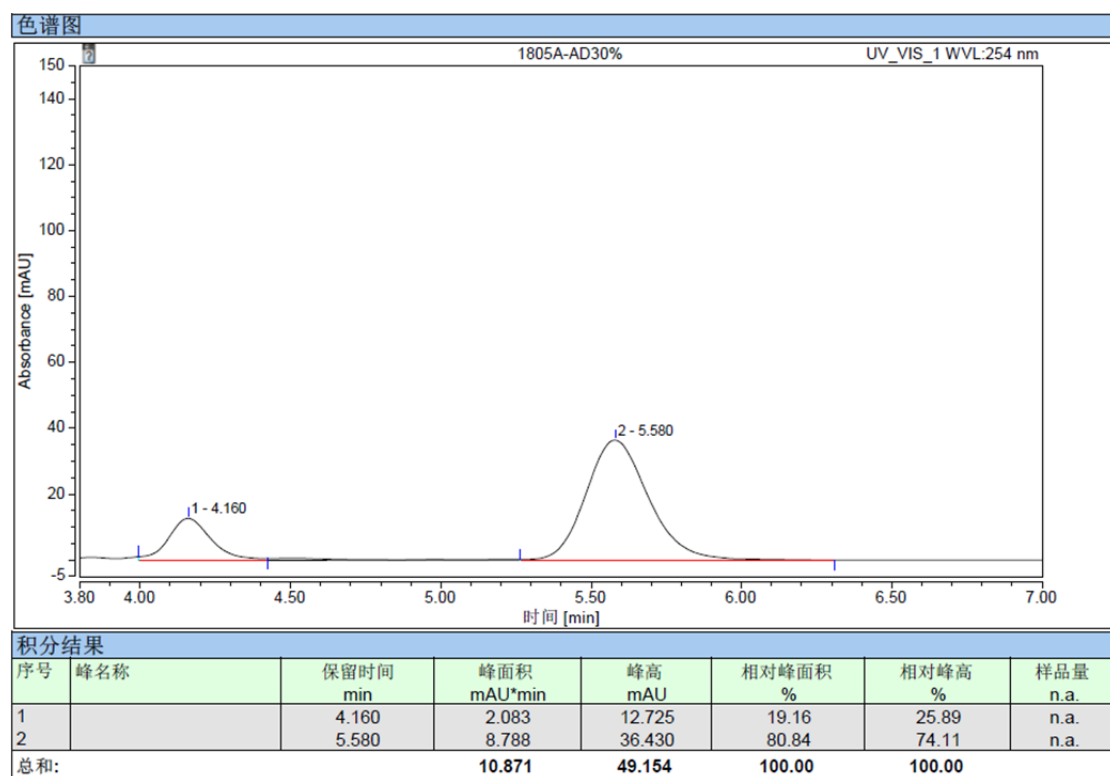

ent-6da

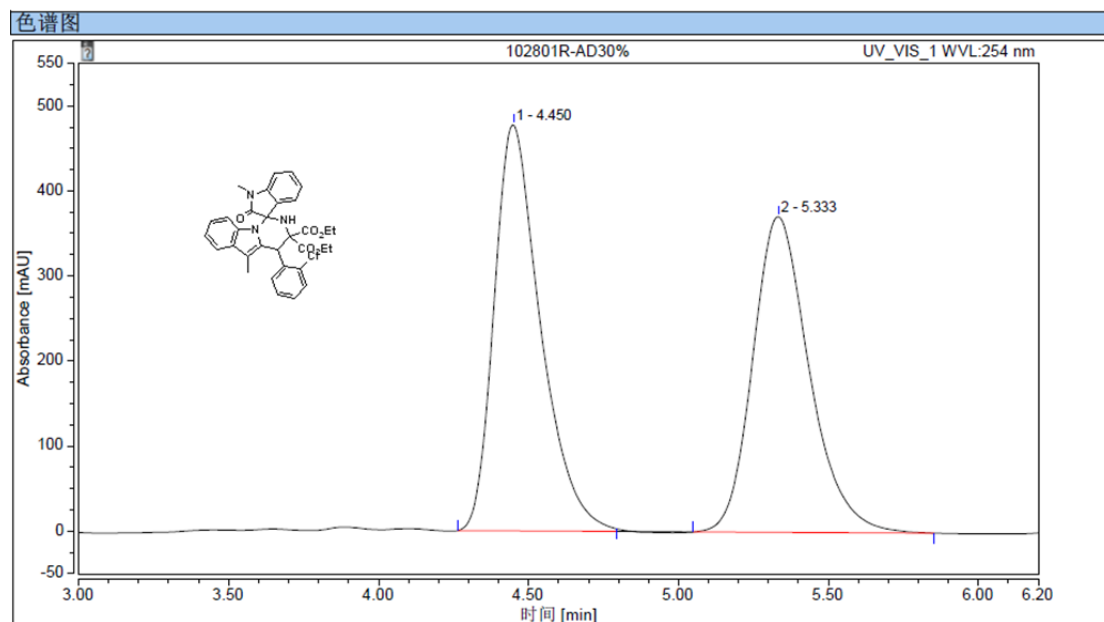

积分结果

| 序号  | 峰名称 | 保留时间<br>min | 峰面积<br>mAU*min | 峰高<br>mAU | 相对峰面积<br>% | 相对峰高<br>% | 样品量<br>n.a. |
|-----|-----|-------------|----------------|-----------|------------|-----------|-------------|
| 1   |     | 4.450       | 85.581         | 477.576   | 51.39      | 56.27     | n.a.        |
| 2   |     | 5.333       | 80.953         | 371.123   | 48.61      | 43.73     | n.a.        |
| 总和: |     |             | 166.535        | 848.699   | 100.00     | 100.00    |             |

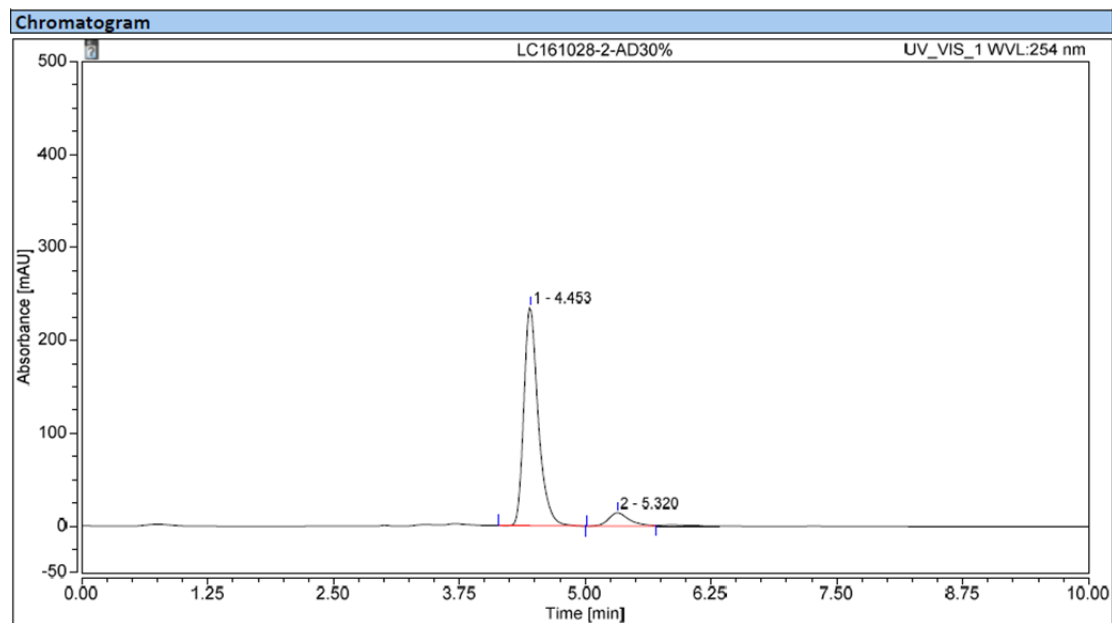

Integration Results

| No.    | Peak Name | Retention Time<br>min | Area<br>mAU*min | Height<br>mAU | Relative Area<br>% | Relative Height<br>% | Amount<br>n.a. |
|--------|-----------|-----------------------|-----------------|---------------|--------------------|----------------------|----------------|
| 1      |           | 4.453                 | 38.963          | 235.020       | 91.94              | 94.28                | n.a.           |
| 2      |           | 5.320                 | 3.414           | 14.250        | 8.06               | 5.72                 | n.a.           |
| Total: |           |                       | 42.377          | 249.270       | 100.00             | 100.00               |                |

ent-6ea

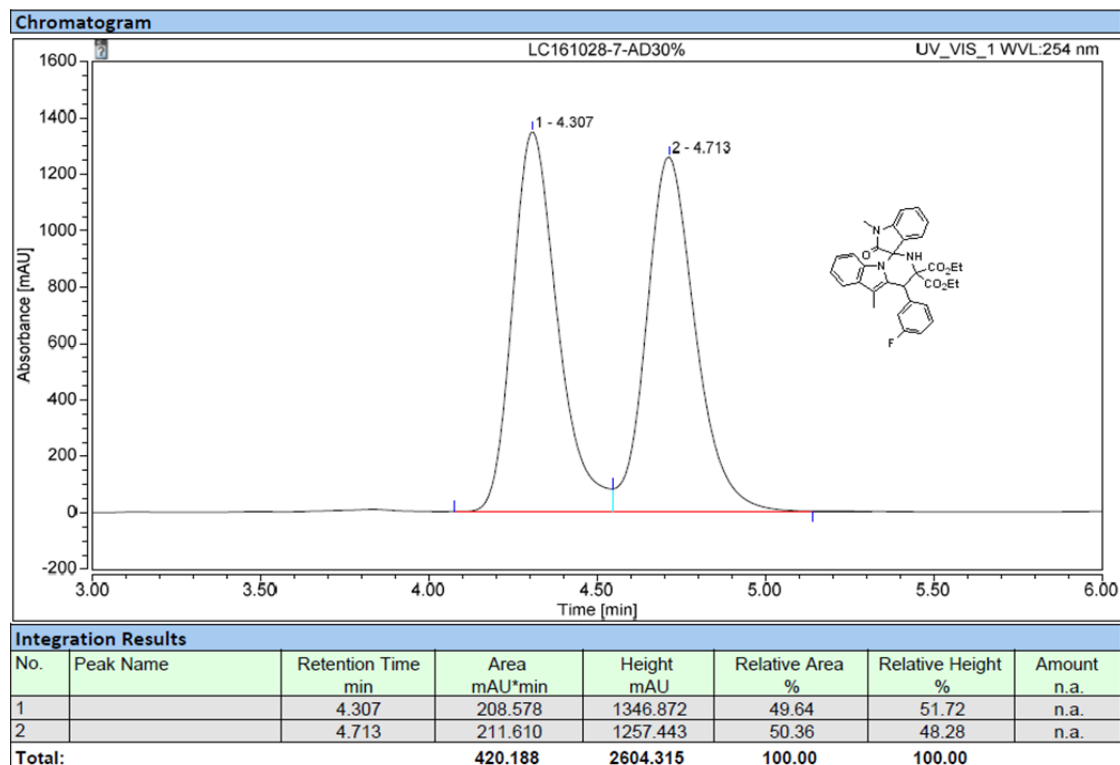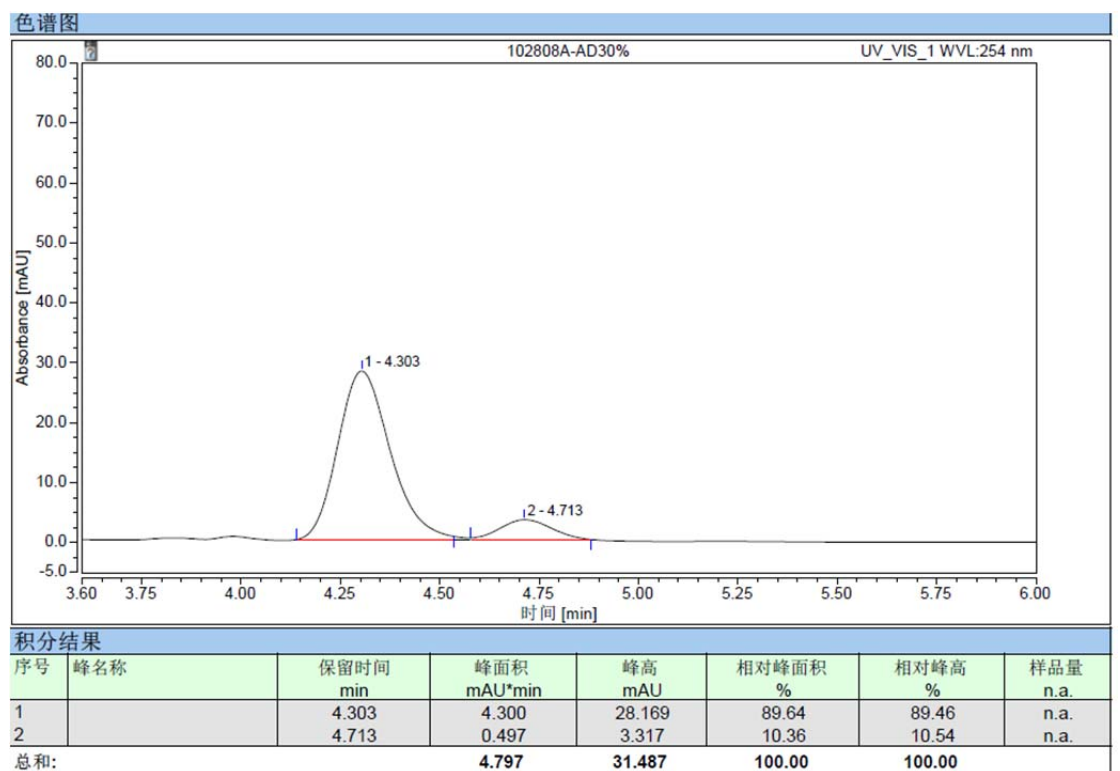

## 6fa

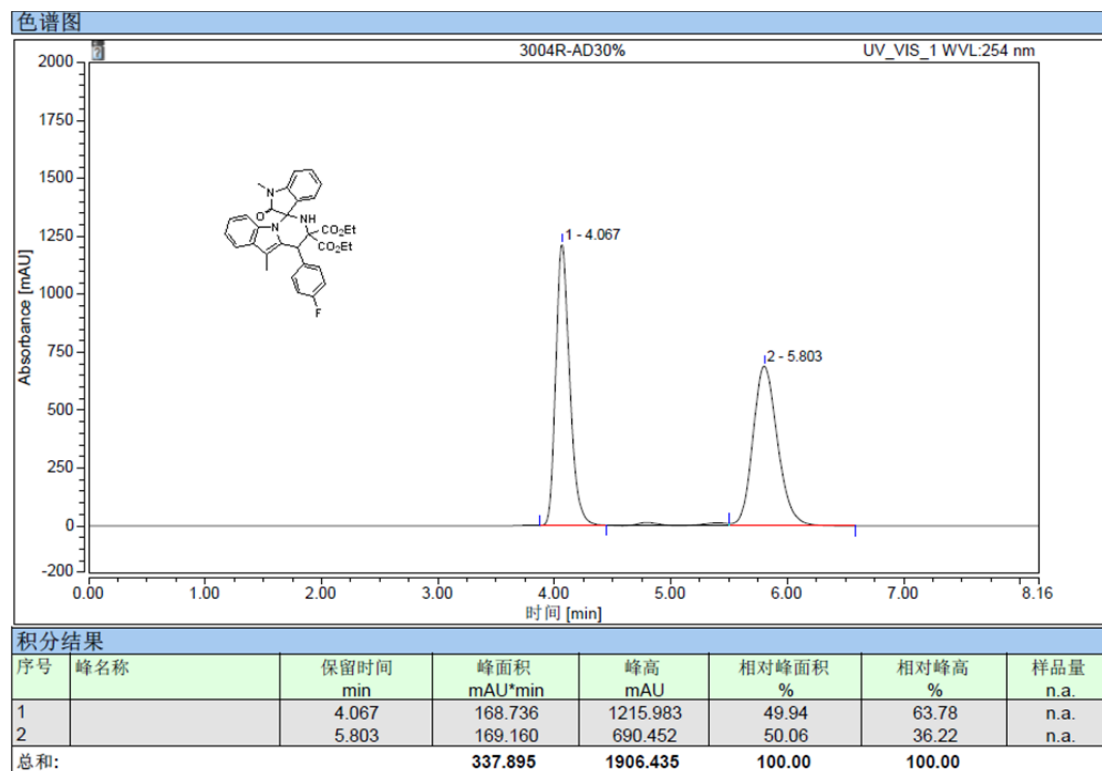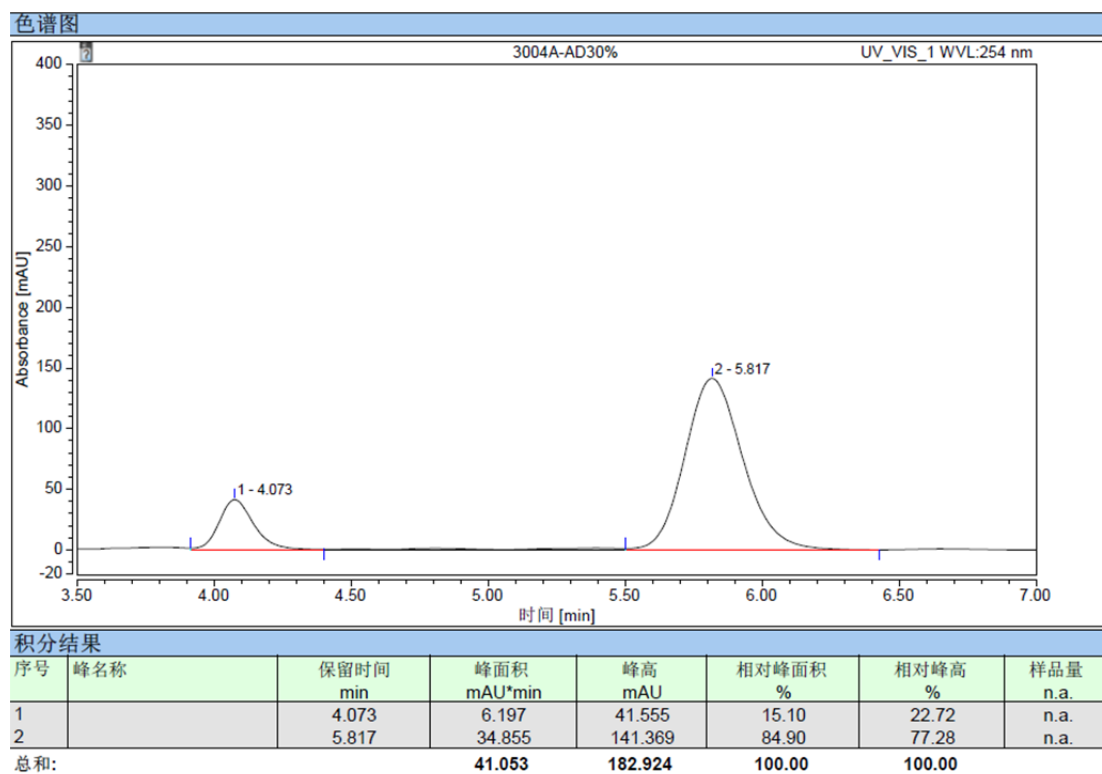

## 6ga

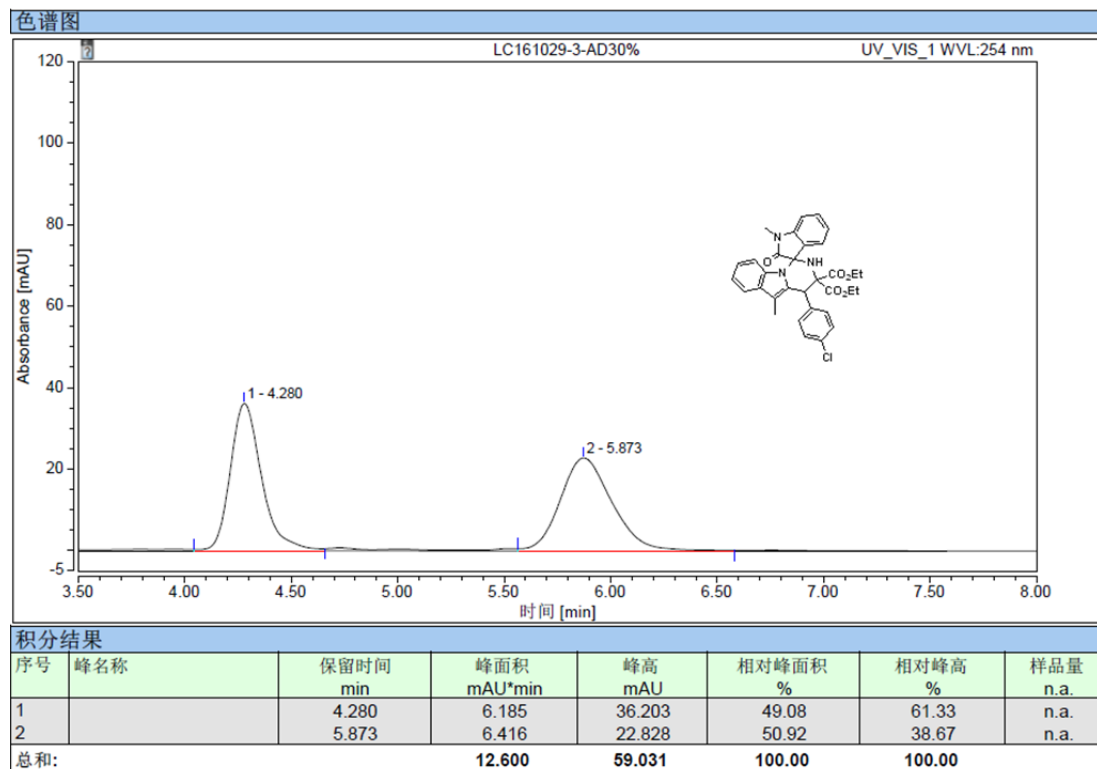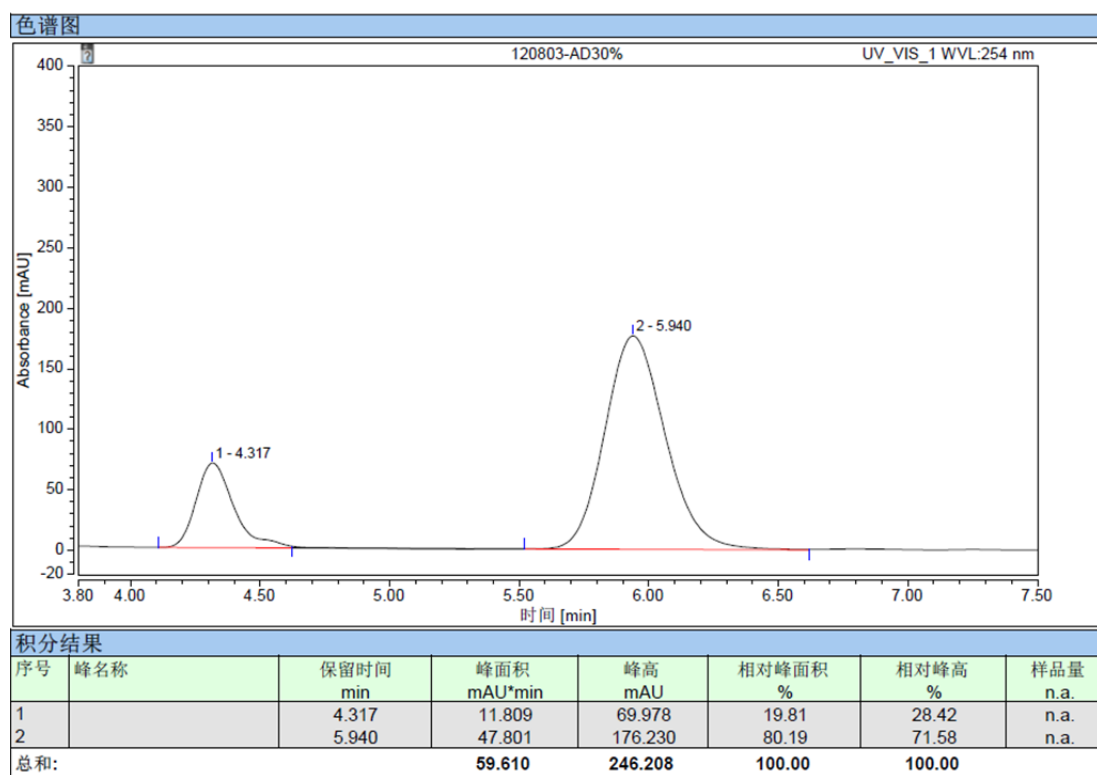

### 6ha

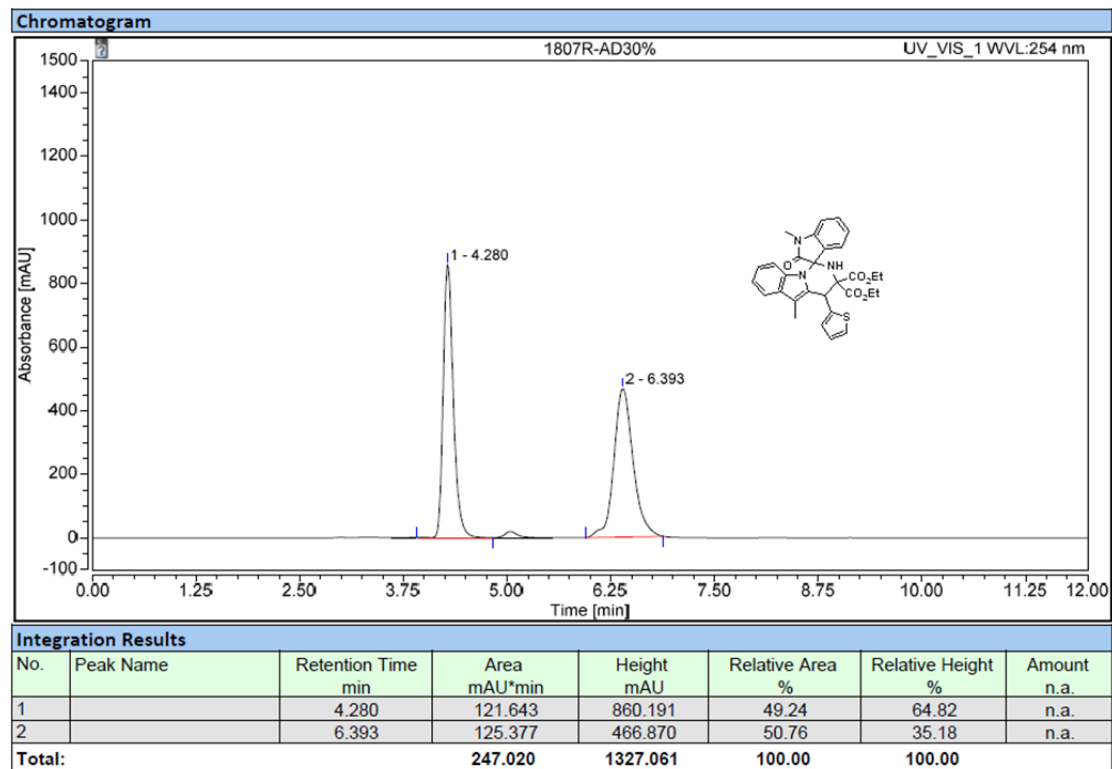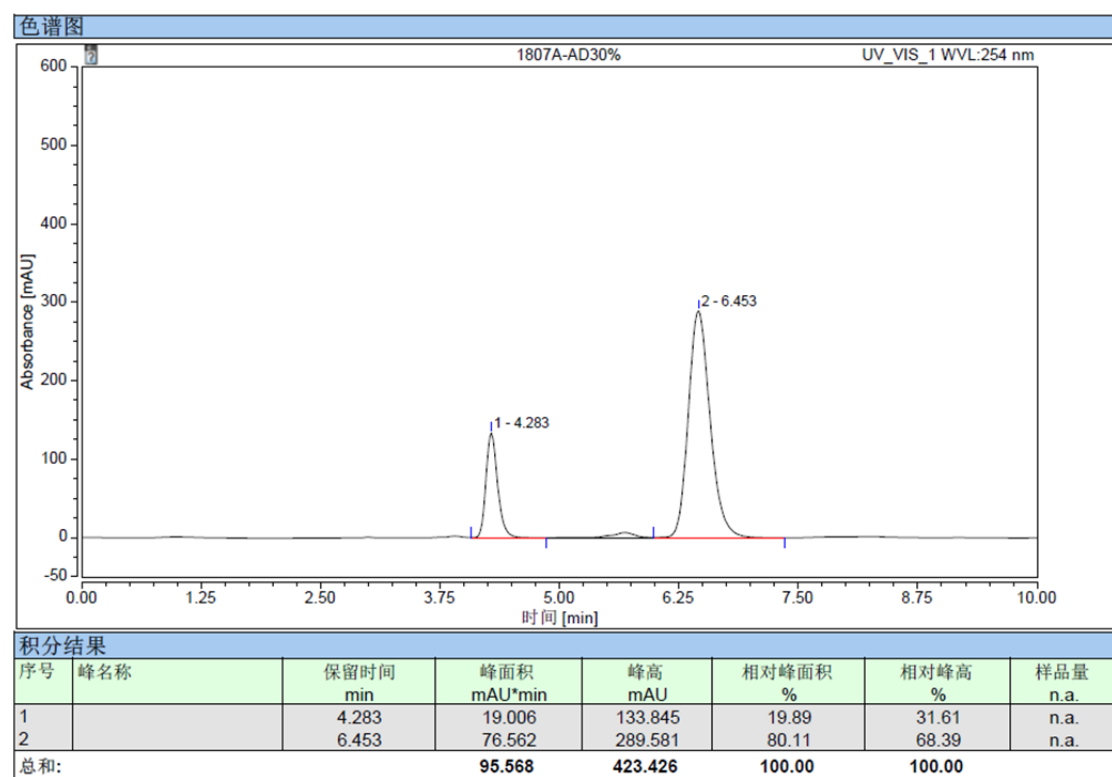



## 6ia

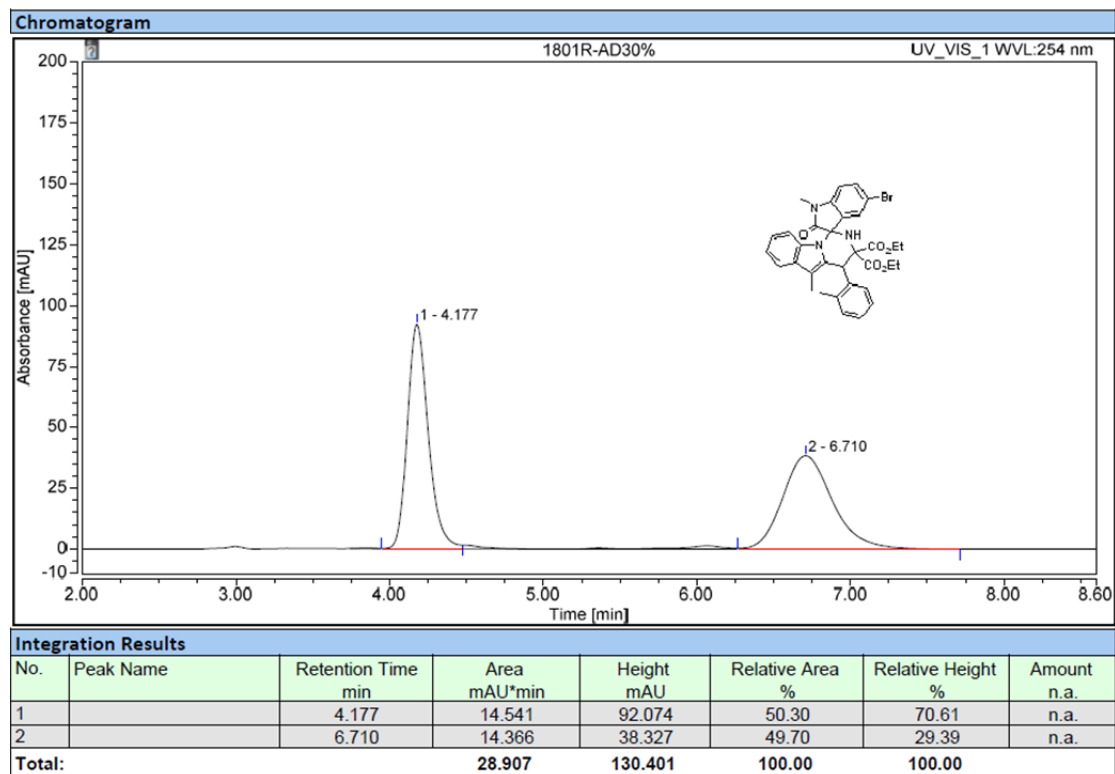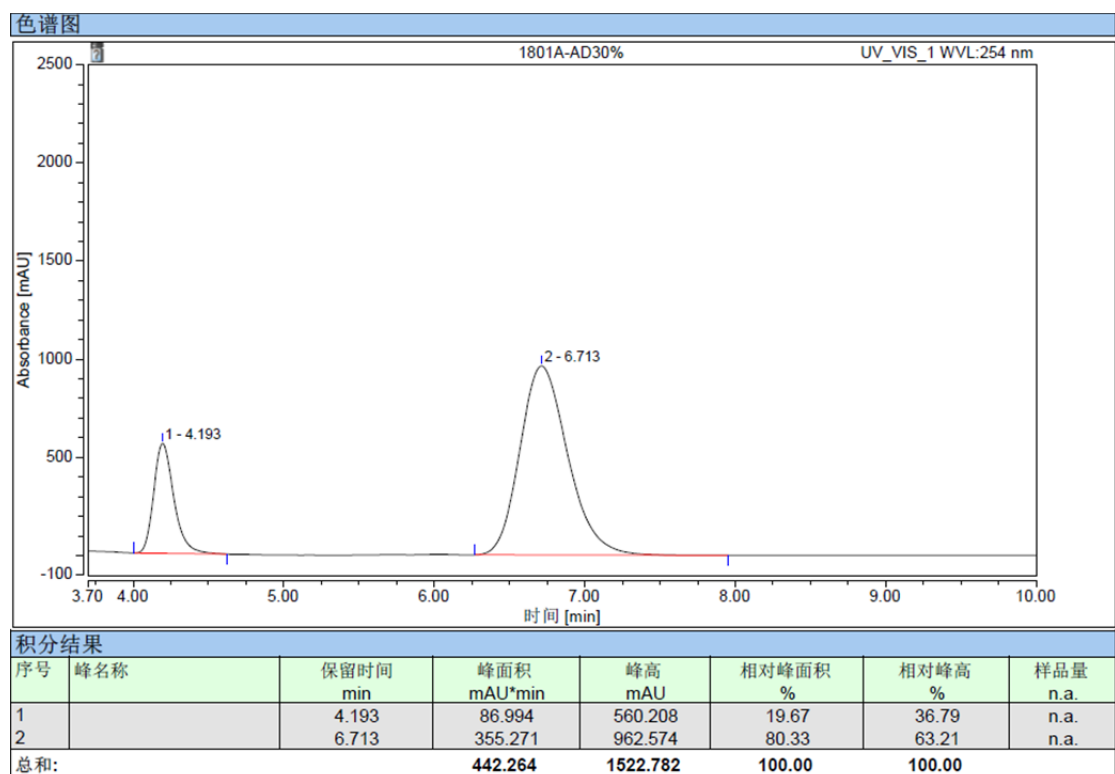

6ja

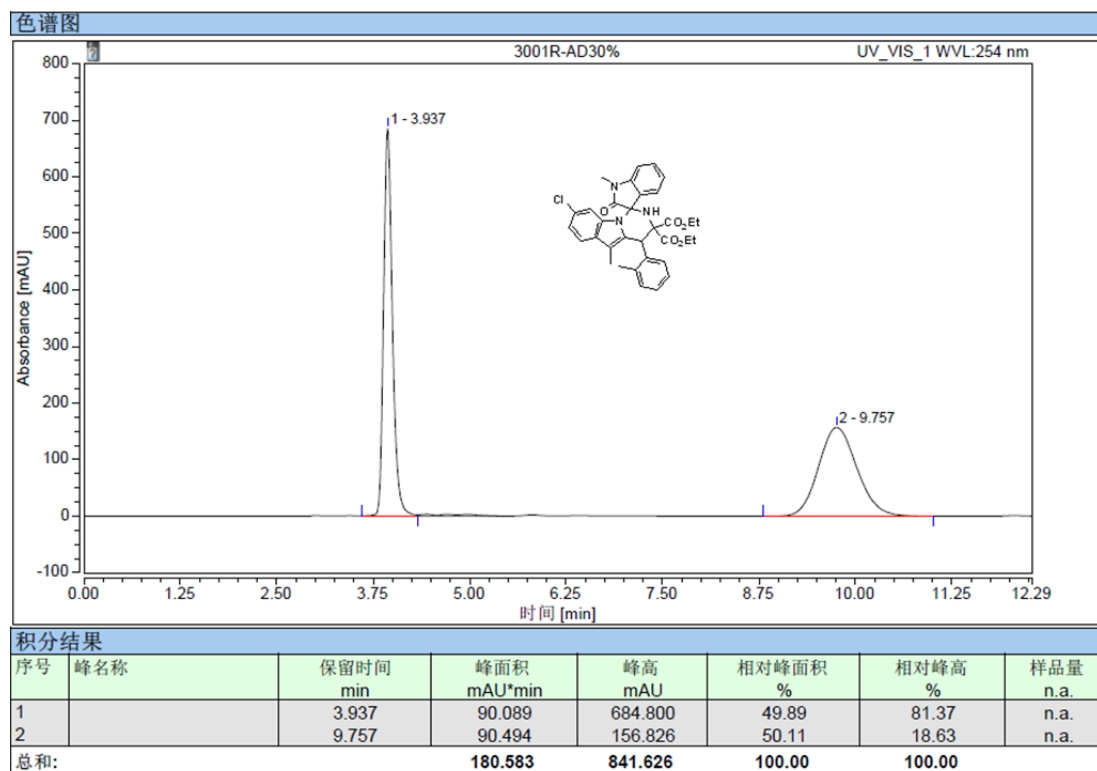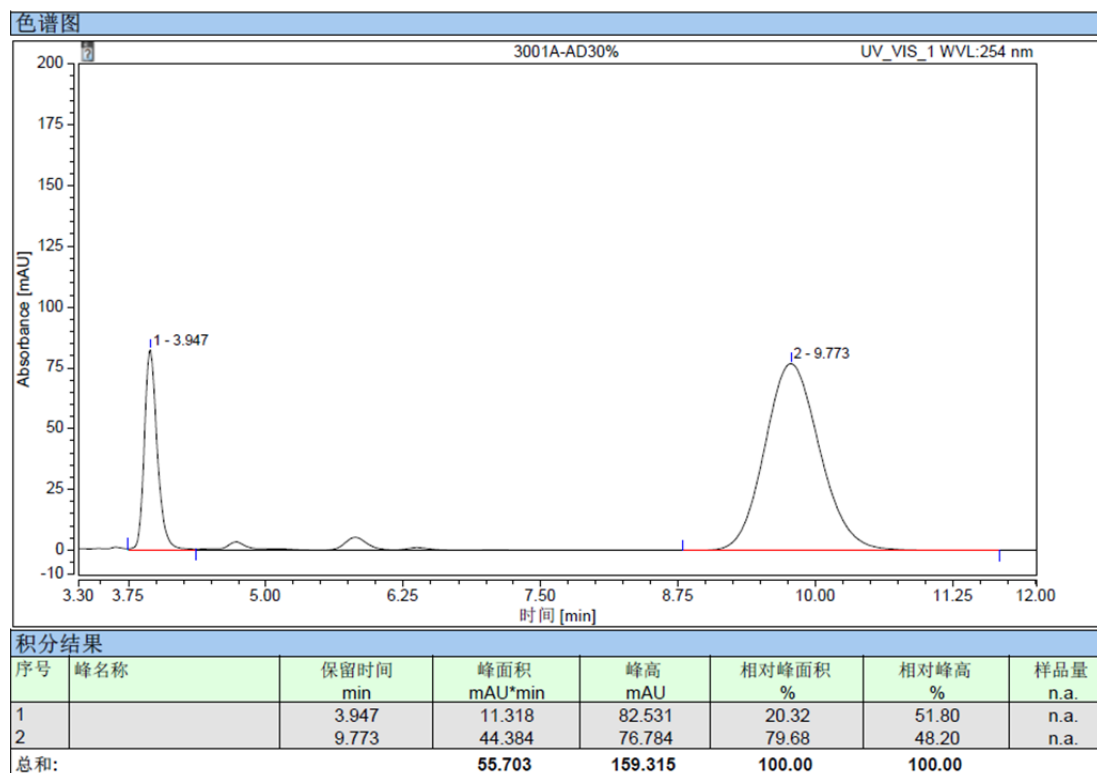

6ka

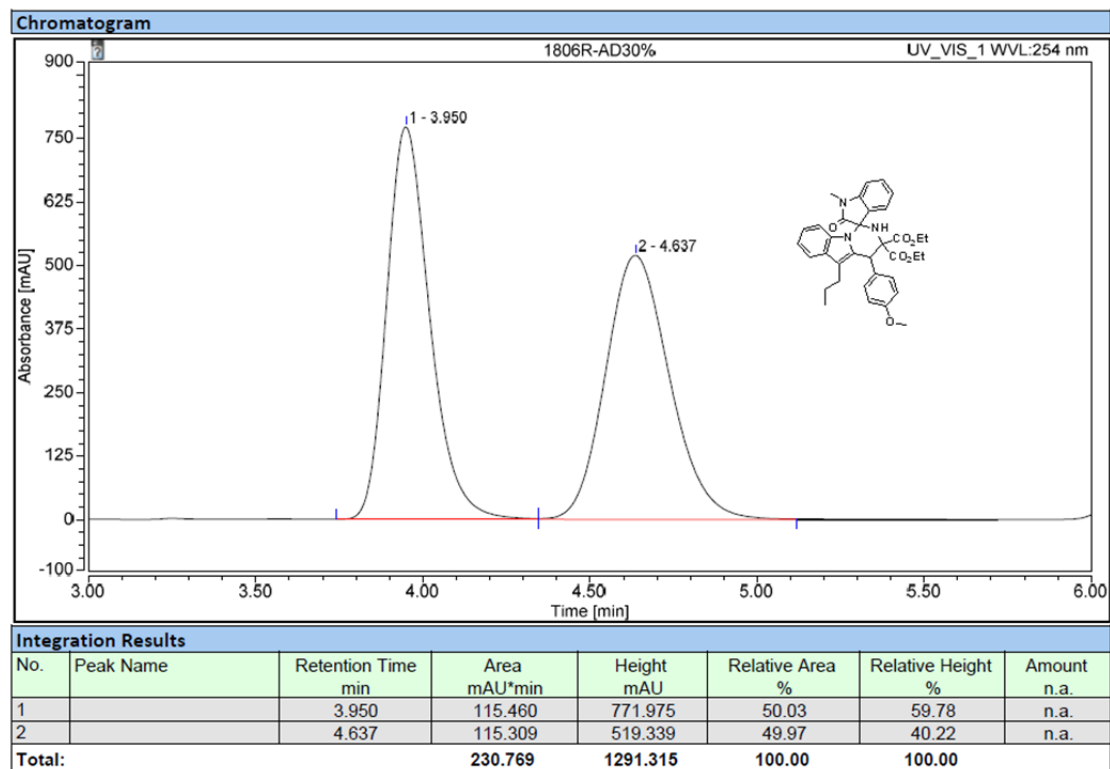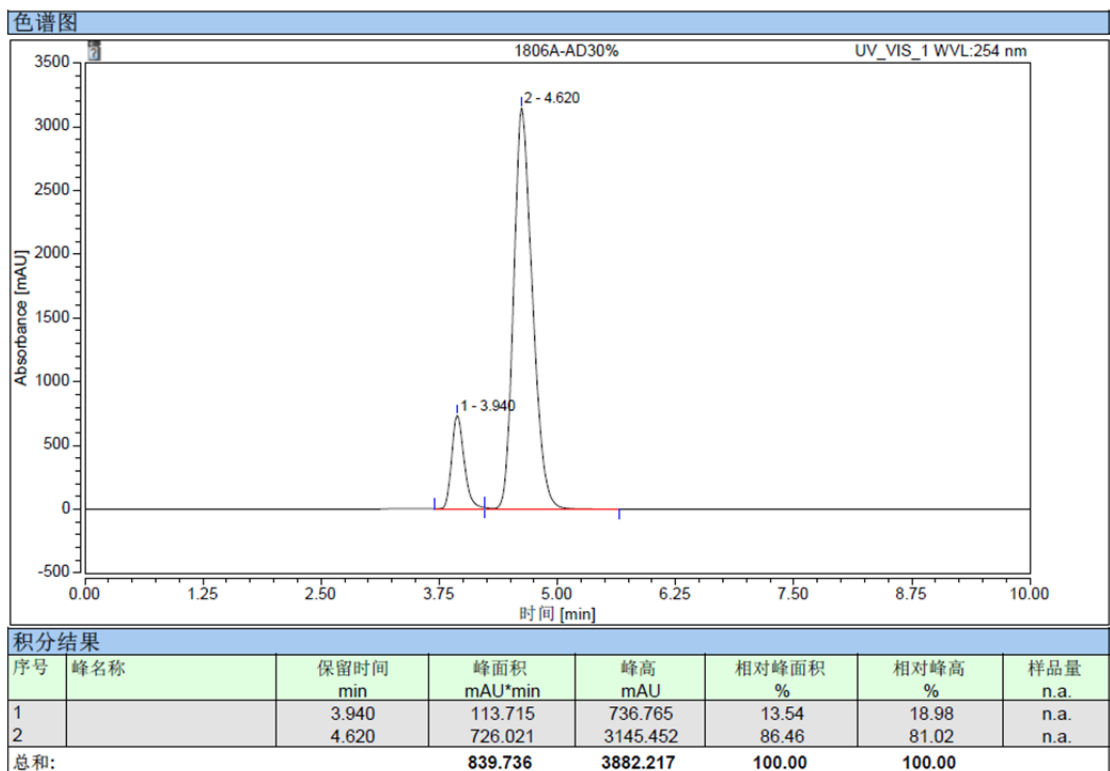

## 61a

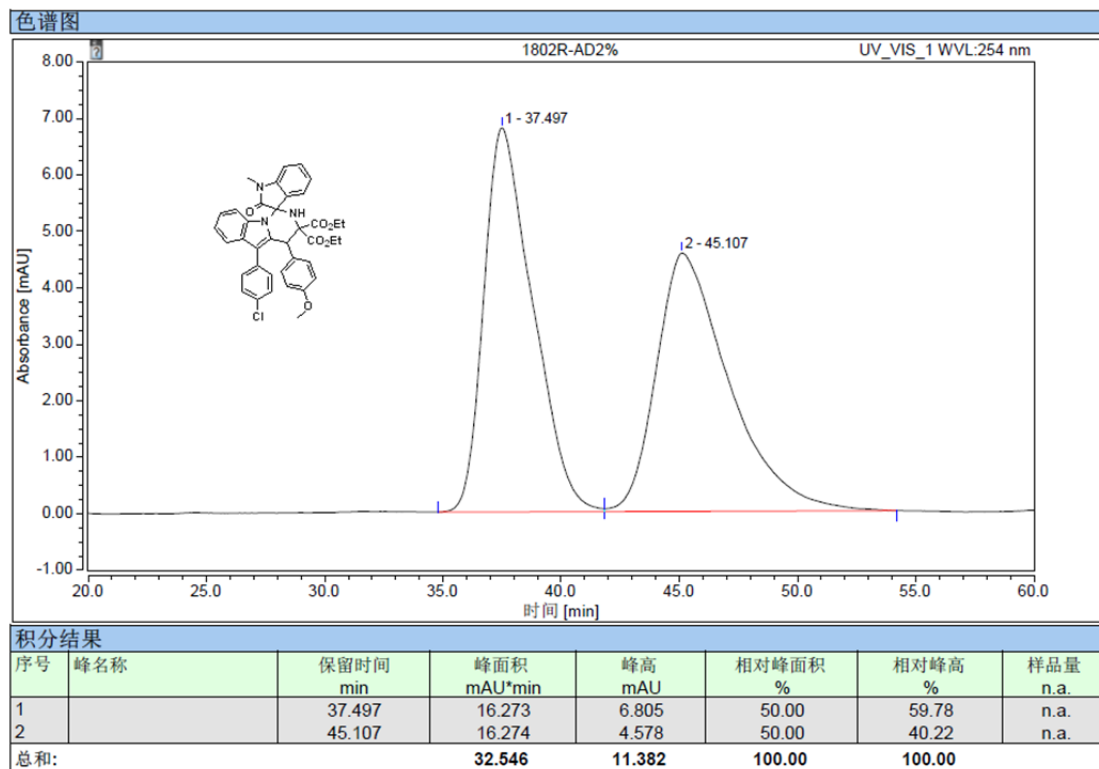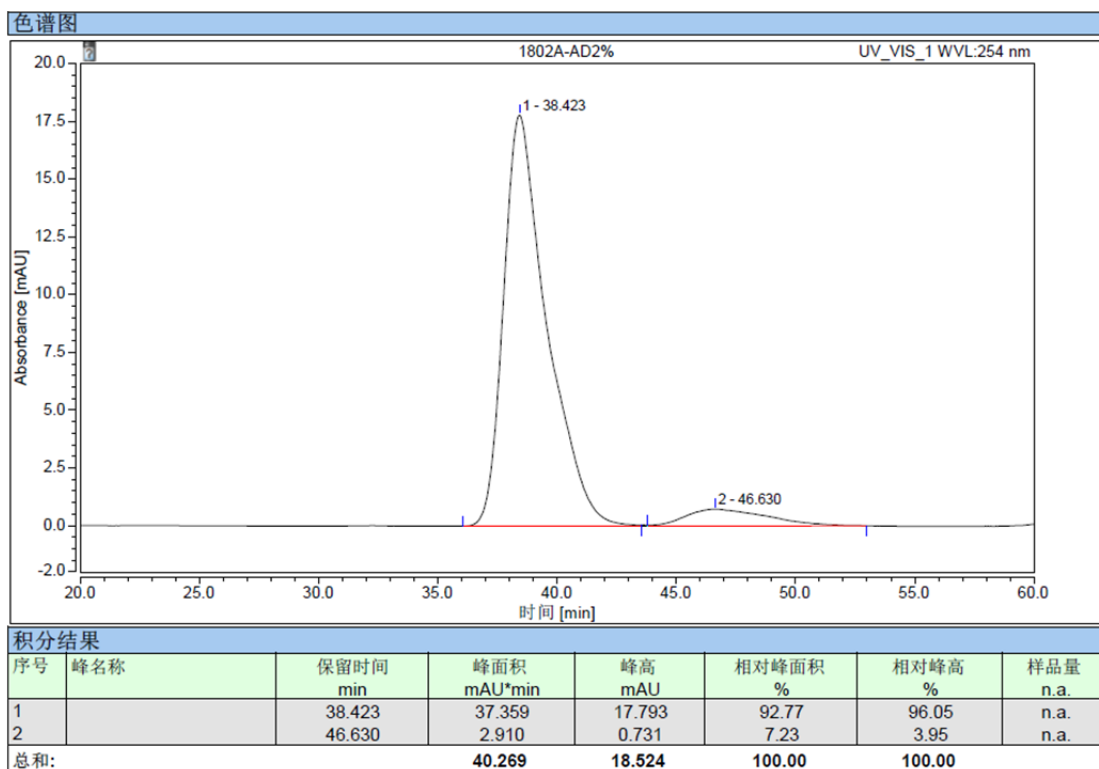

## 6ab

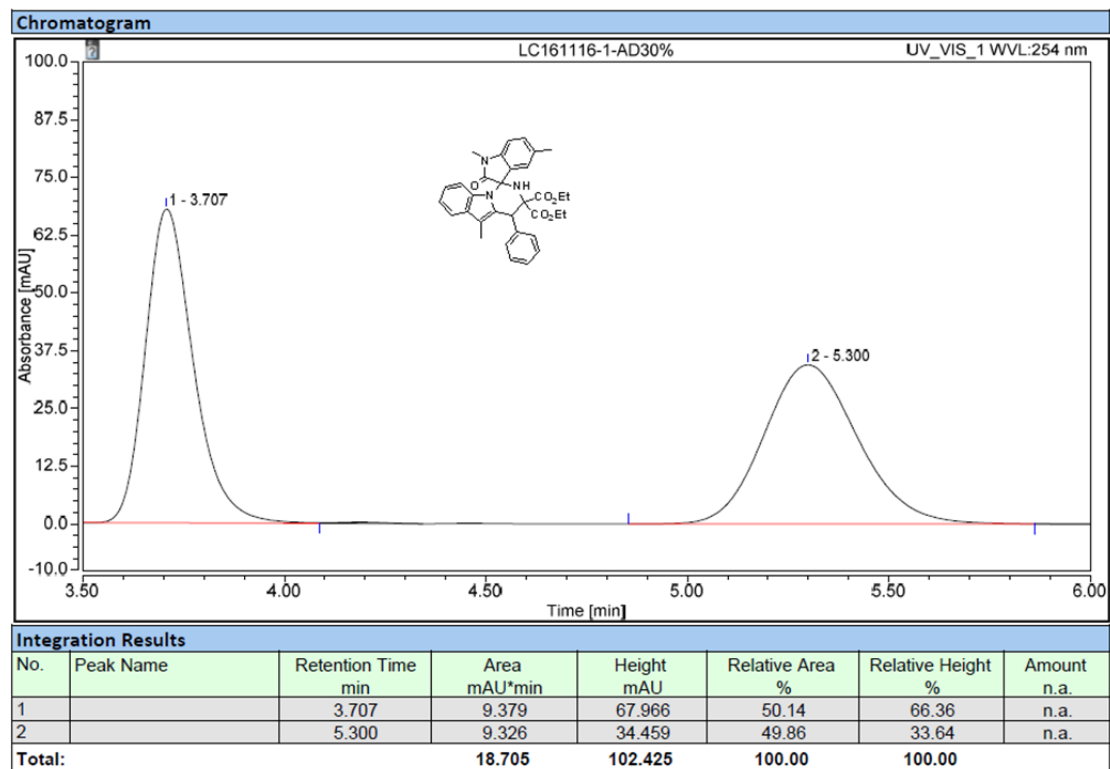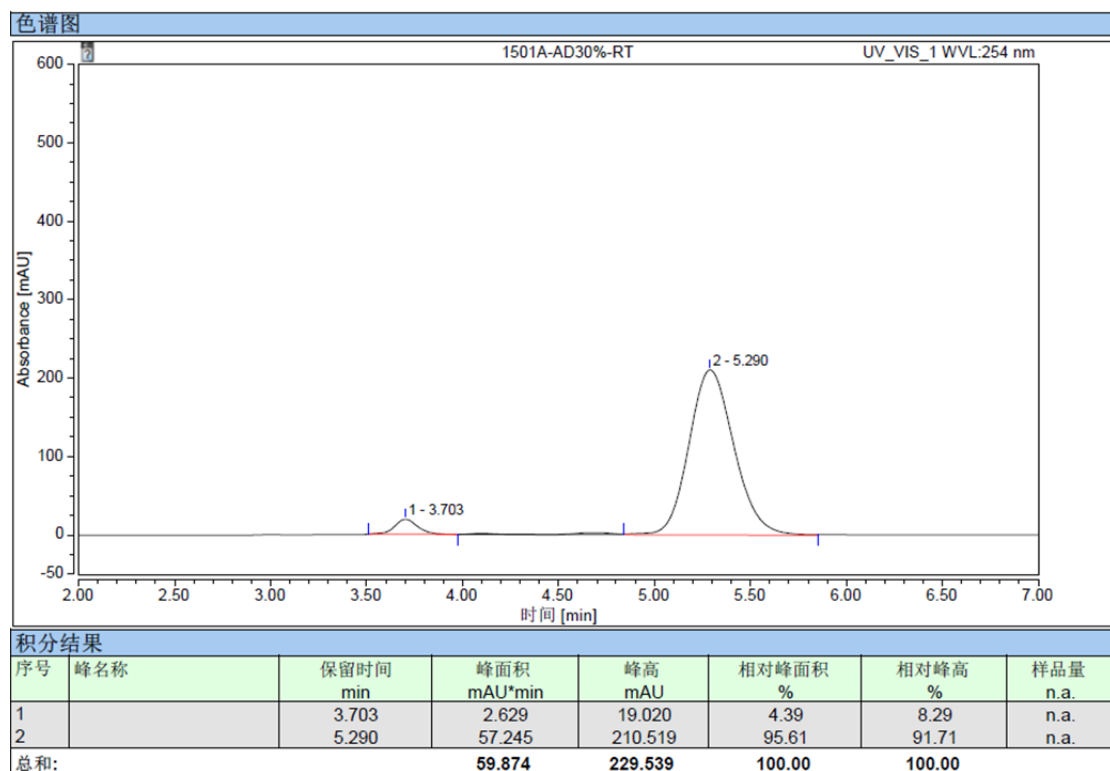

## 6ac

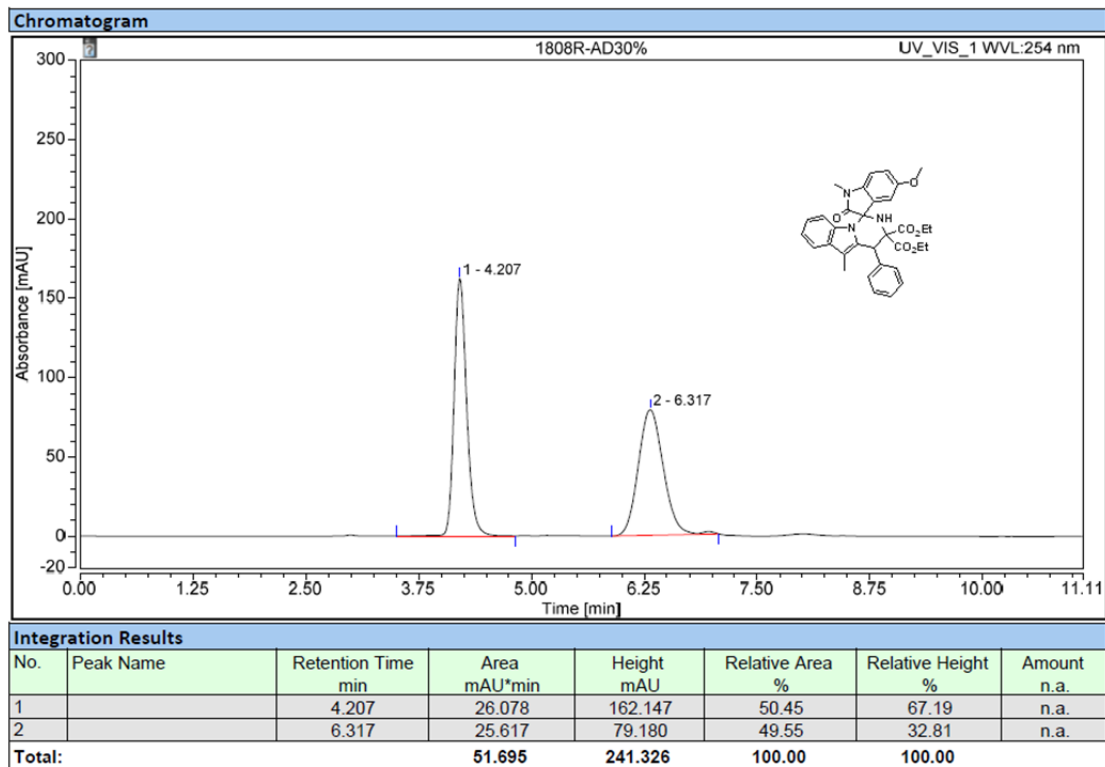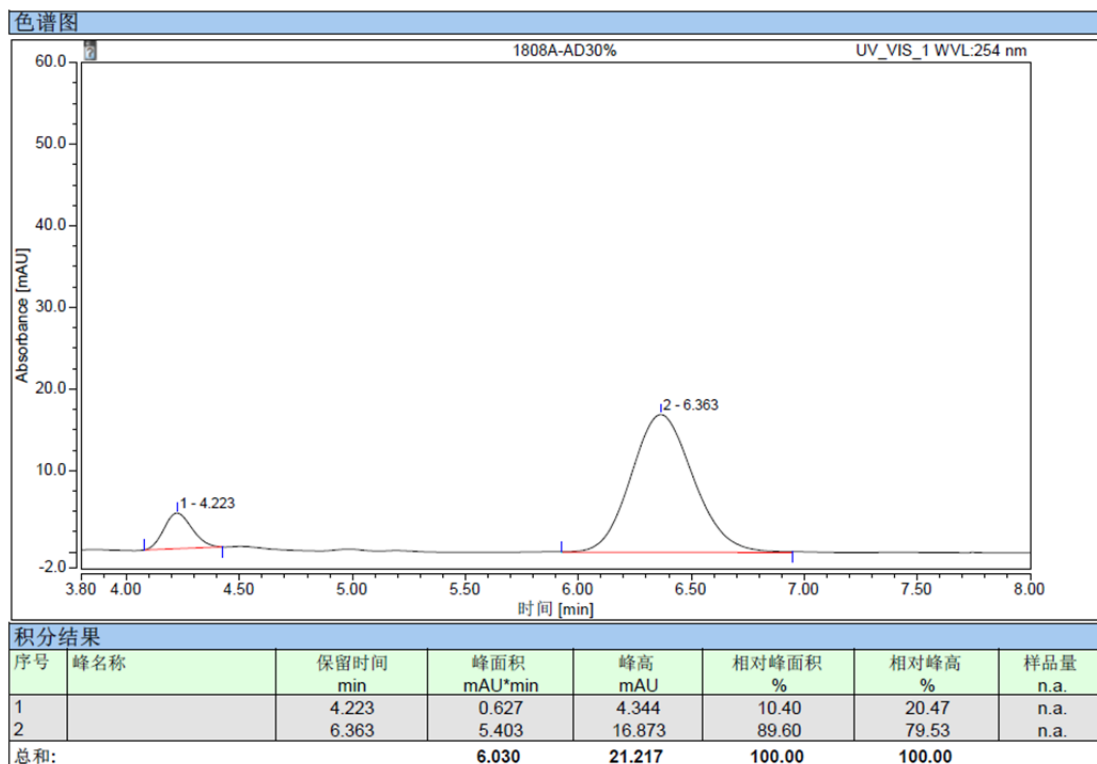

## 6ad

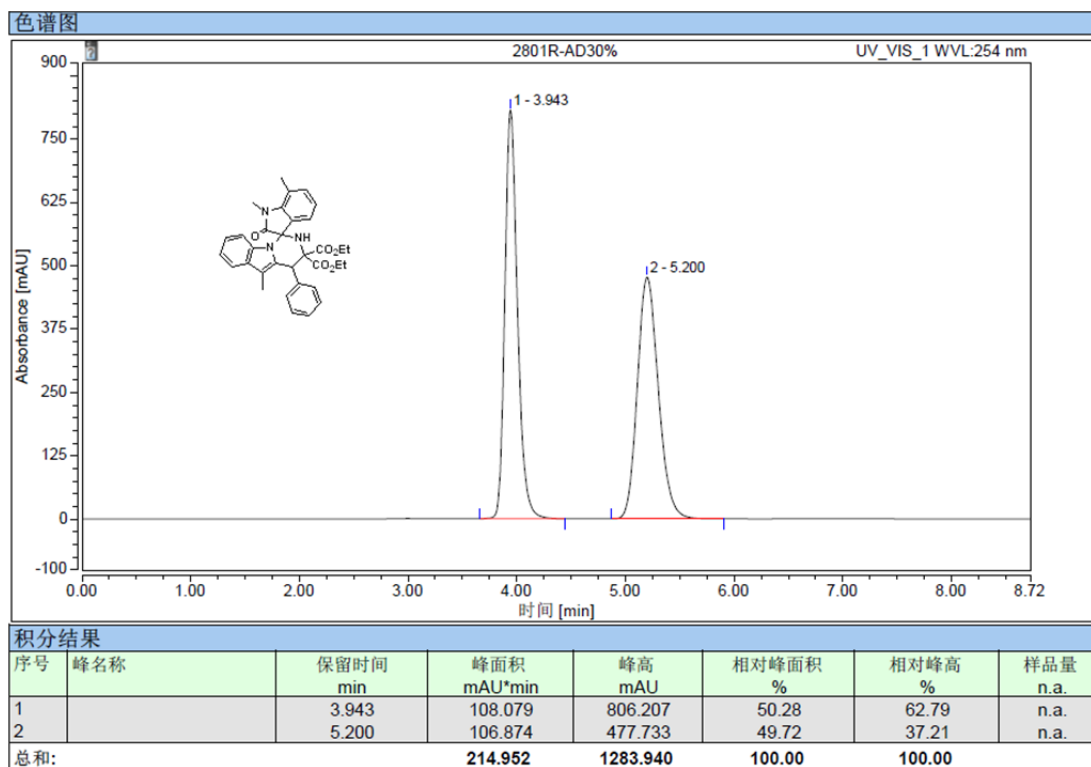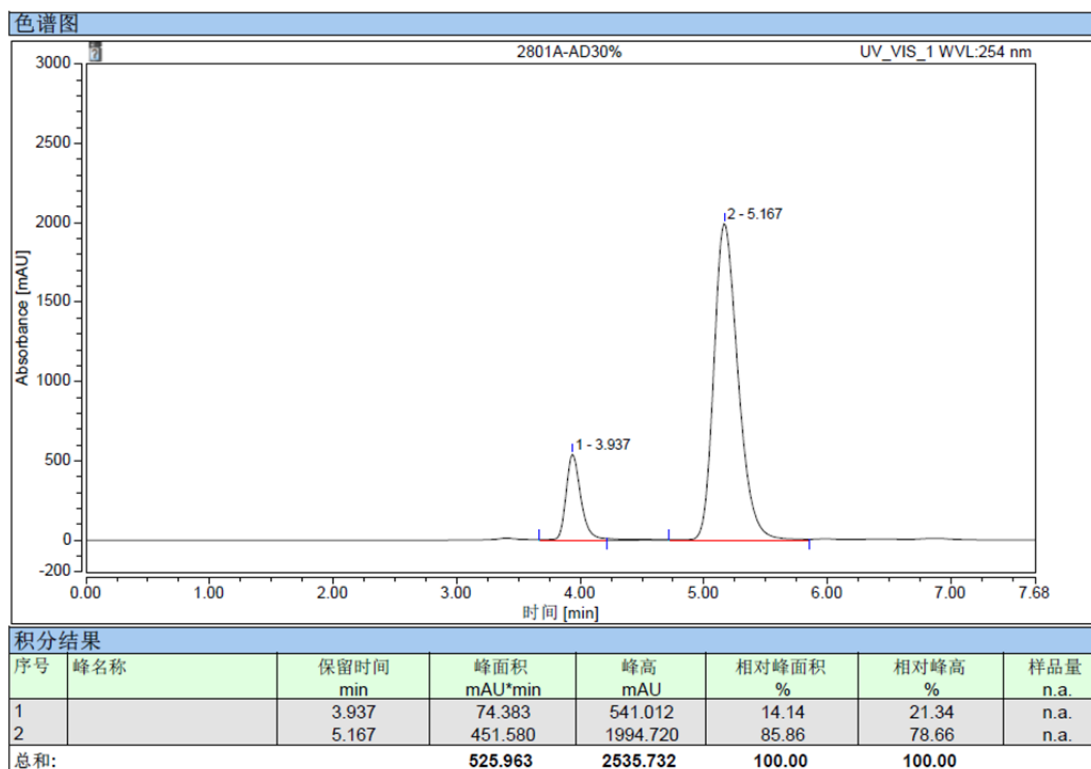

6ae

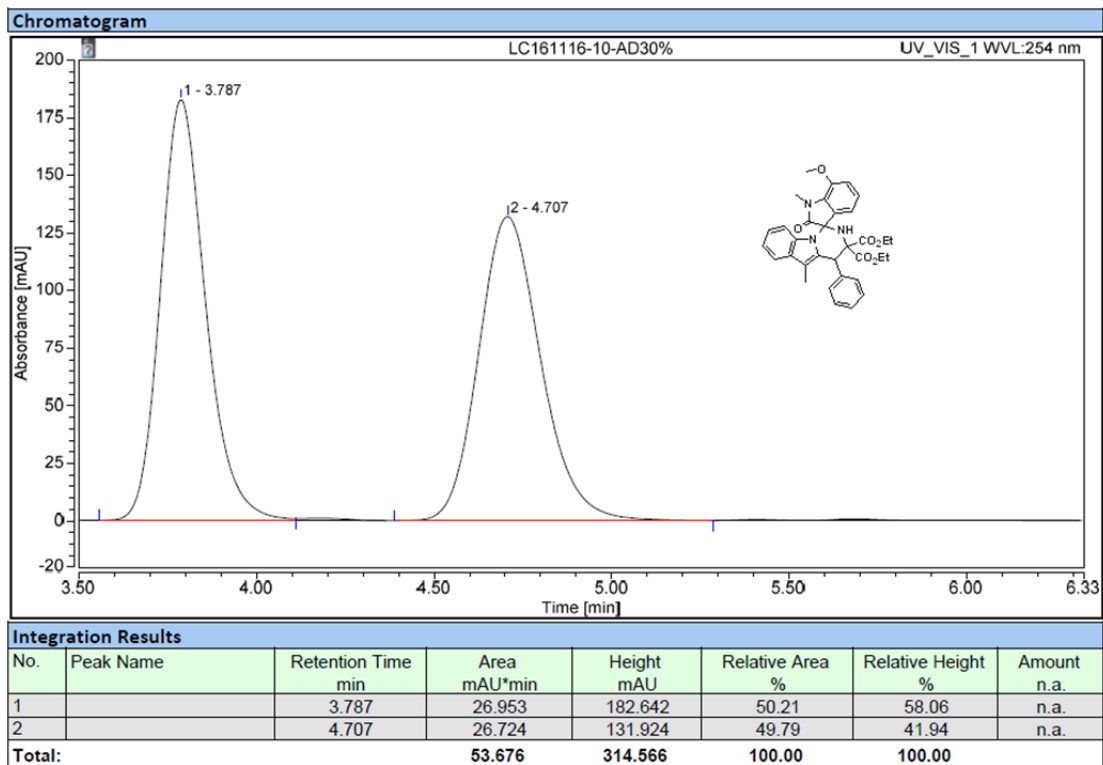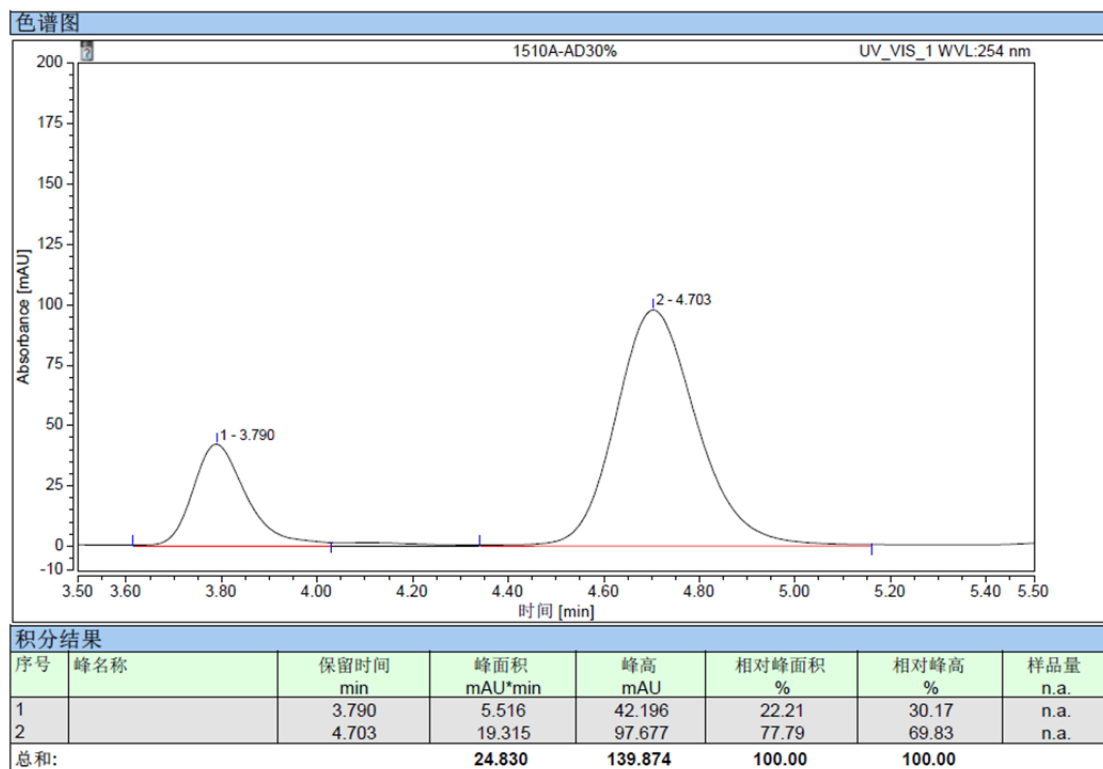



## 6af

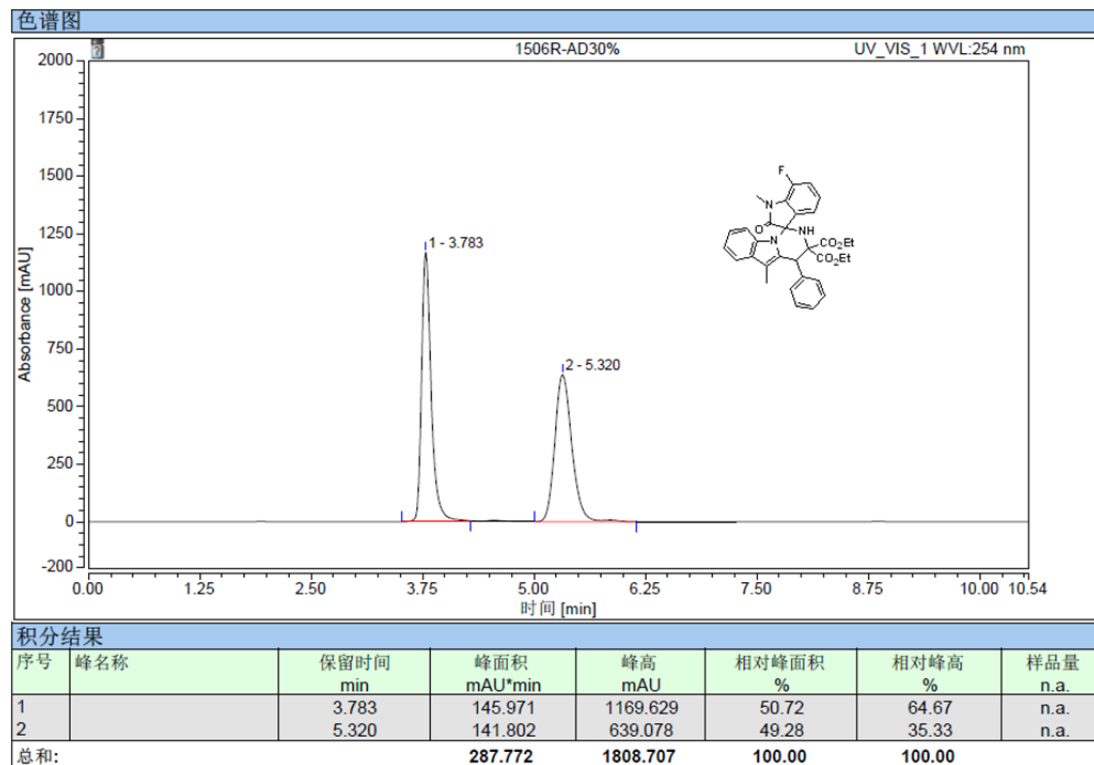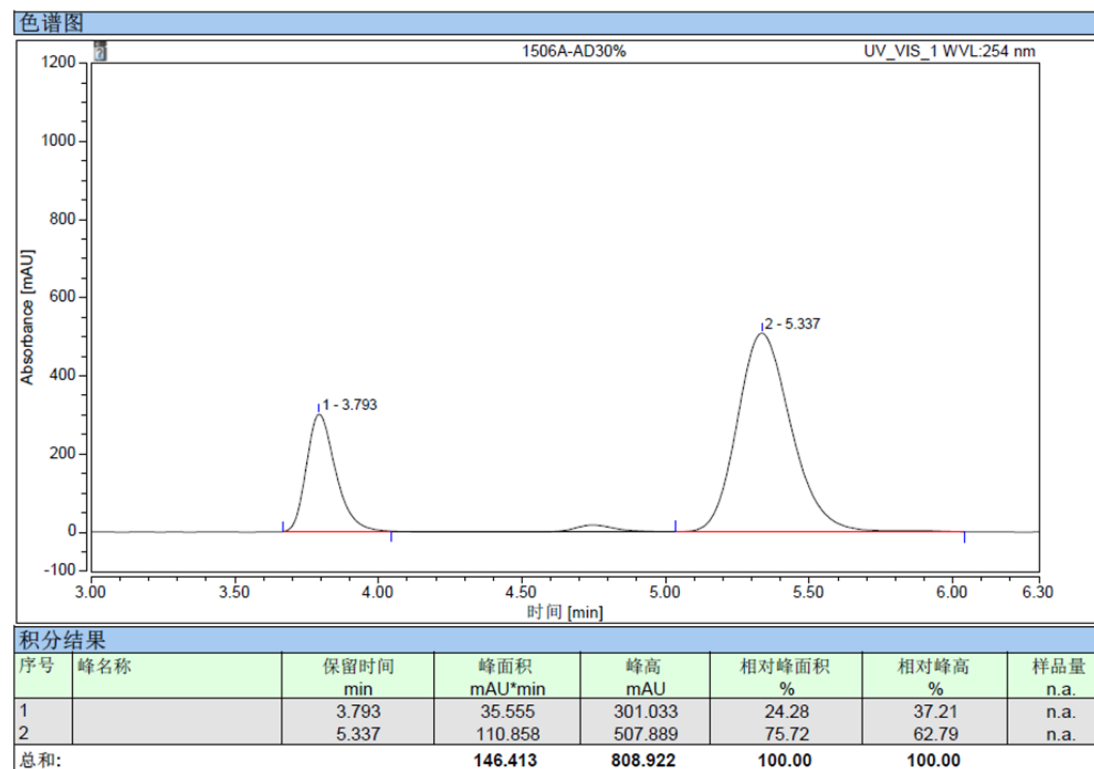

6mb

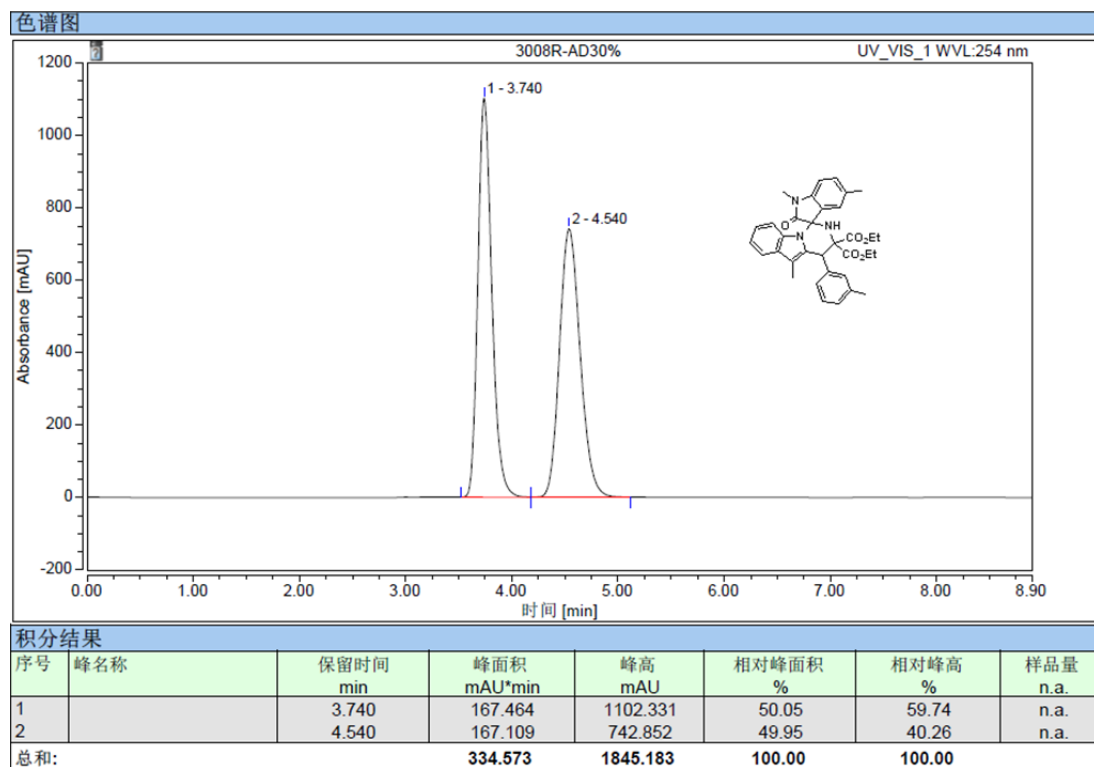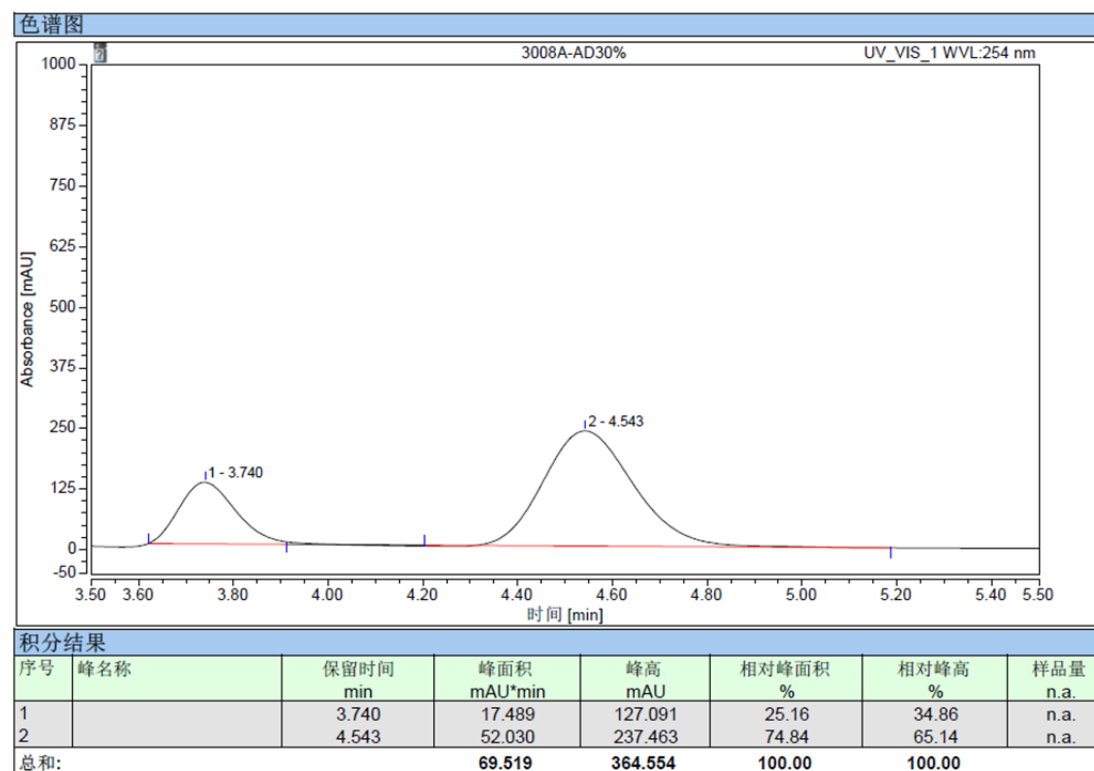

## 6. X-ray single crystal data for product 6aa

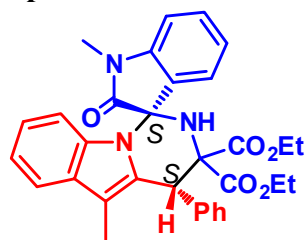

(S,S)-6aa

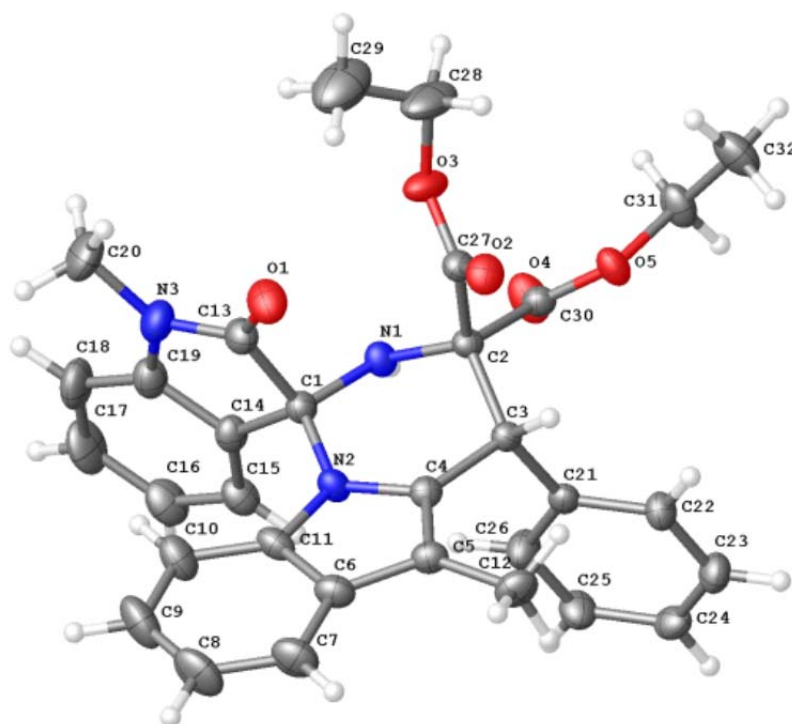

The thermal ellipsoid was drawn at the 30% probability level.

|                        |                                                                                                    |
|------------------------|----------------------------------------------------------------------------------------------------|
| Empirical formula      | C <sub>32</sub> H <sub>31</sub> N <sub>3</sub> O <sub>5</sub>                                      |
| Formula weight         | 537.60                                                                                             |
| Temperature            | 130 K                                                                                              |
| Wavelength             | 1.54178 Å                                                                                          |
| Crystal system         | Orthorhombic                                                                                       |
| Space group            | F d d 2                                                                                            |
| Unit cell dimensions   | a = 31.9591(4) Å      α = 90°.<br>b = 33.2764(4) Å      β = 90°.<br>c = 10.32080(10) Å    γ = 90°. |
| Volume                 | 10976.0(2) Å <sup>3</sup>                                                                          |
| Z                      | 16                                                                                                 |
| Density (calculated)   | 1.301 Mg/m <sup>3</sup>                                                                            |
| Absorption coefficient | 0.720 mm <sup>-1</sup>                                                                             |
| F(000)                 | 4544                                                                                               |
| Crystal size           | 0.2 x 0.18 x 0.15 mm <sup>3</sup>                                                                  |

|                                   |                                             |
|-----------------------------------|---------------------------------------------|
| Theta range for data collection   | 3.835 to 69.544°.                           |
| Index ranges                      | -38<=h<=37, -39<=k<=39, -12<=l<=12          |
| Reflections collected             | 20326                                       |
| Independent reflections           | 4942 [R(int) = 0.0460]                      |
| Completeness to theta = 67.679°   | 99.9 %                                      |
| Absorption correction             | Semi-empirical from equivalents             |
| Max. and min. transmission        | 0.7532 and 0.5856                           |
| Refinement method                 | Full-matrix least-squares on F <sup>2</sup> |
| Data / restraints / parameters    | 4942 / 1 / 369                              |
| Goodness-of-fit on F <sup>2</sup> | 1.038                                       |
| Final R indices [I>2sigma(I)]     | R1 = 0.0418, wR2 = 0.1130                   |
| R indices (all data)              | R1 = 0.0436, wR2 = 0.1149                   |
| Absolute structure parameter      | -0.02(9)                                    |
| Extinction coefficient            | n/a                                         |
| Largest diff. peak and hole       | 0.581 and -0.257 e.Å <sup>-3</sup>          |
